# Supplementary material for: A Sparse-Modeling Based Approach for Class Specific Feature Selection
Source: PeerJ journal article supplement (doi:10.7717/peerj-cs.237), 2019-11-18
Supplement: Naive_Bayes_plots.pdf [file Naive_Bayes_plots.pdf]

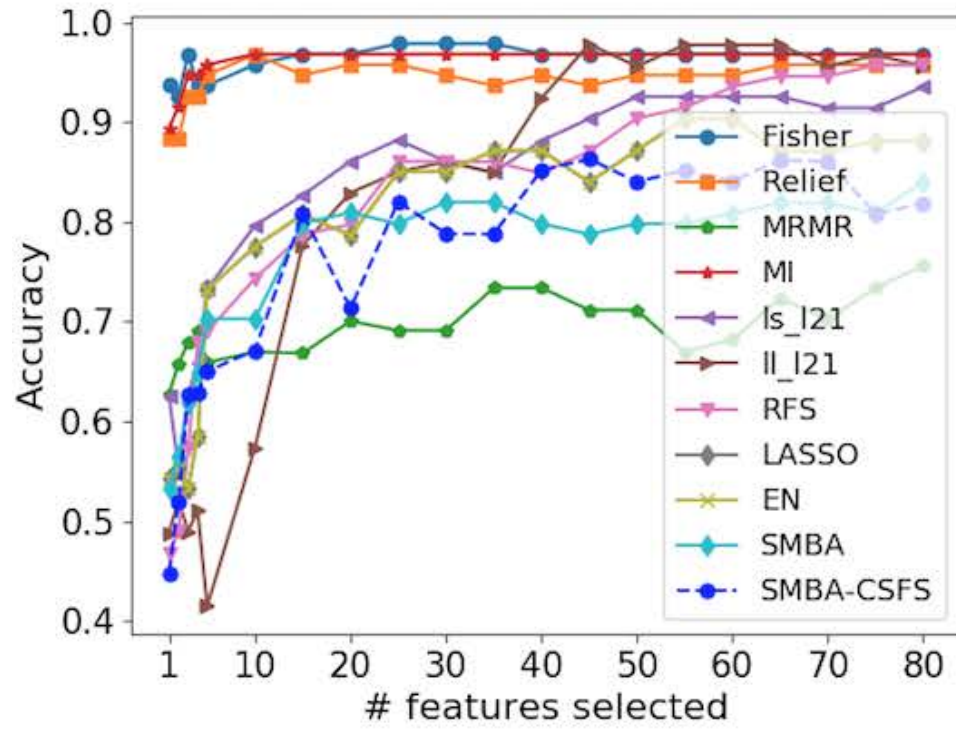

(a) ALLAML (2)

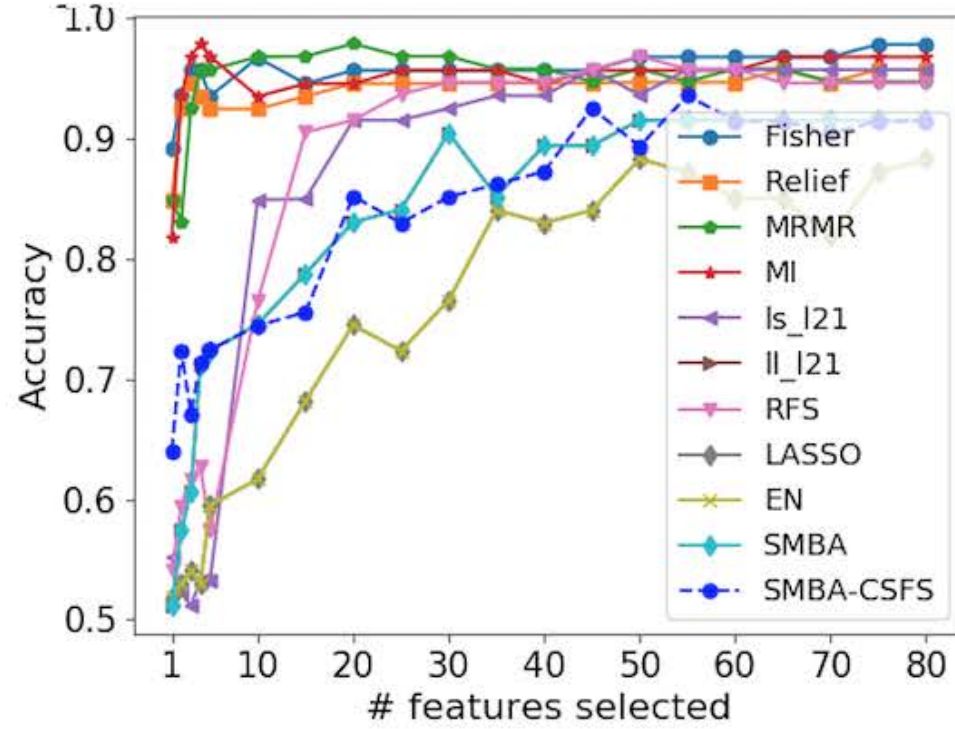

(b) LEUKEMIA (2)

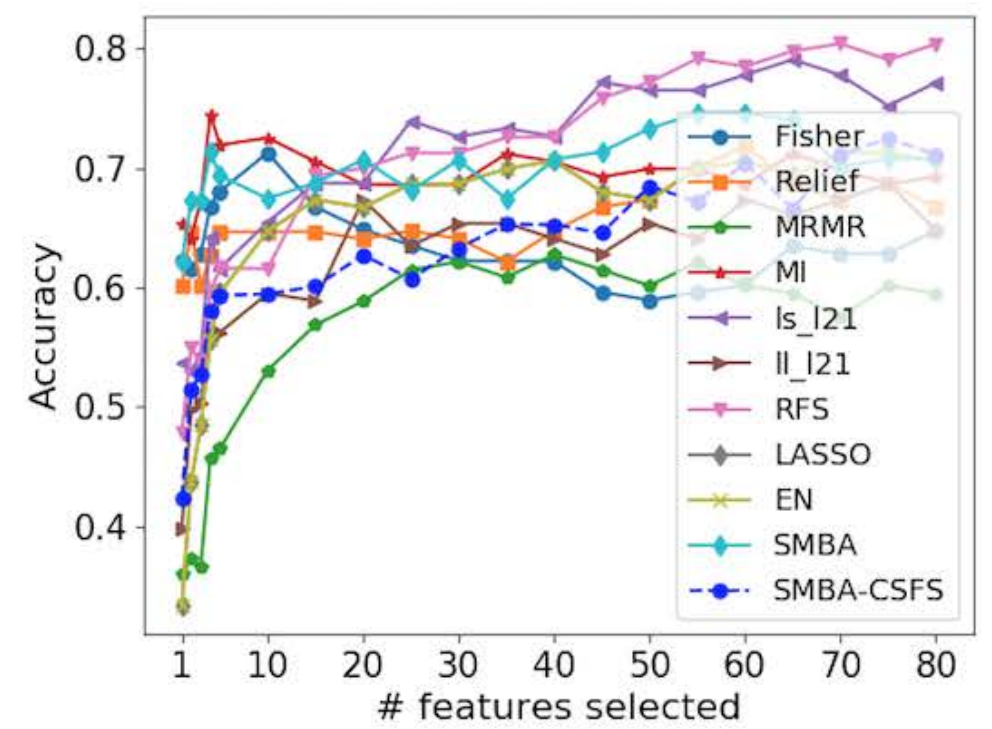

(c) CLL\_SUB\_111 (3)

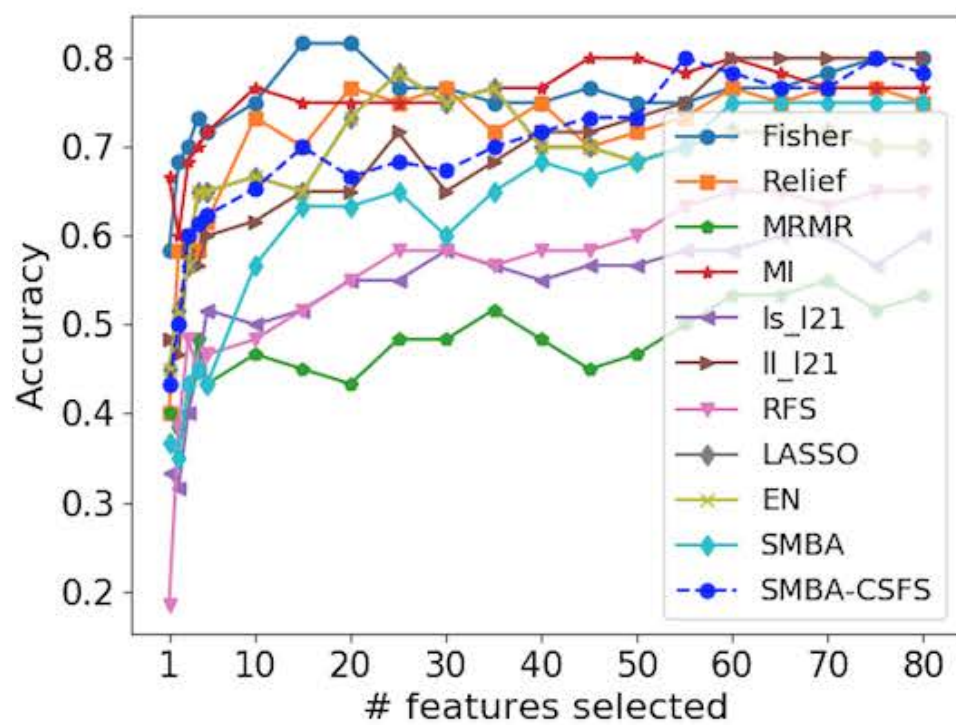

(d) GLIOMA (4)

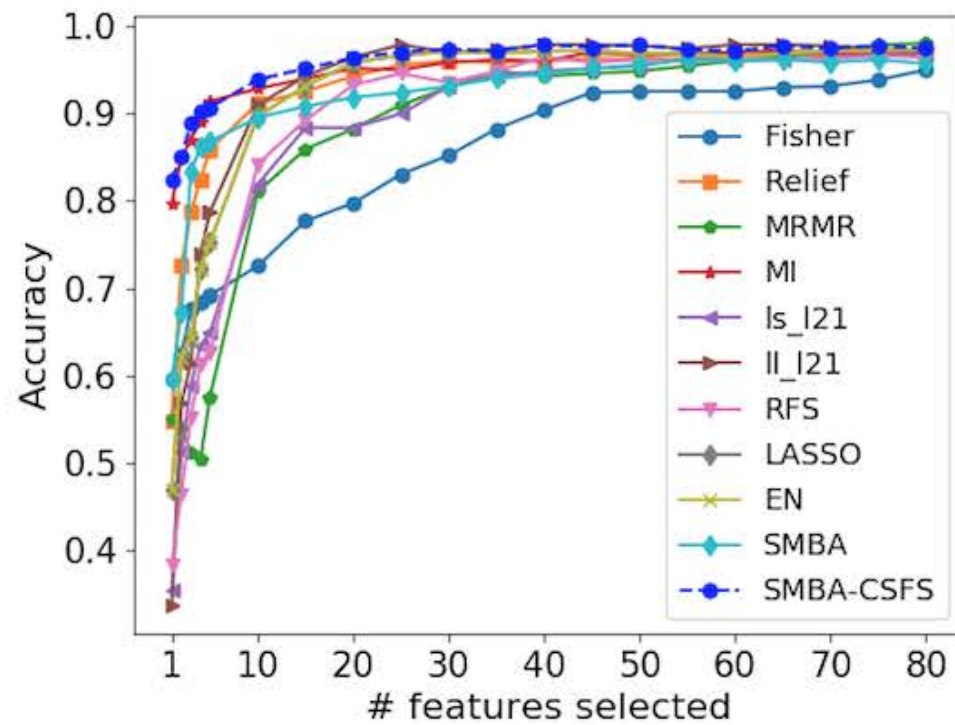

(e) LUNG\_C (5)

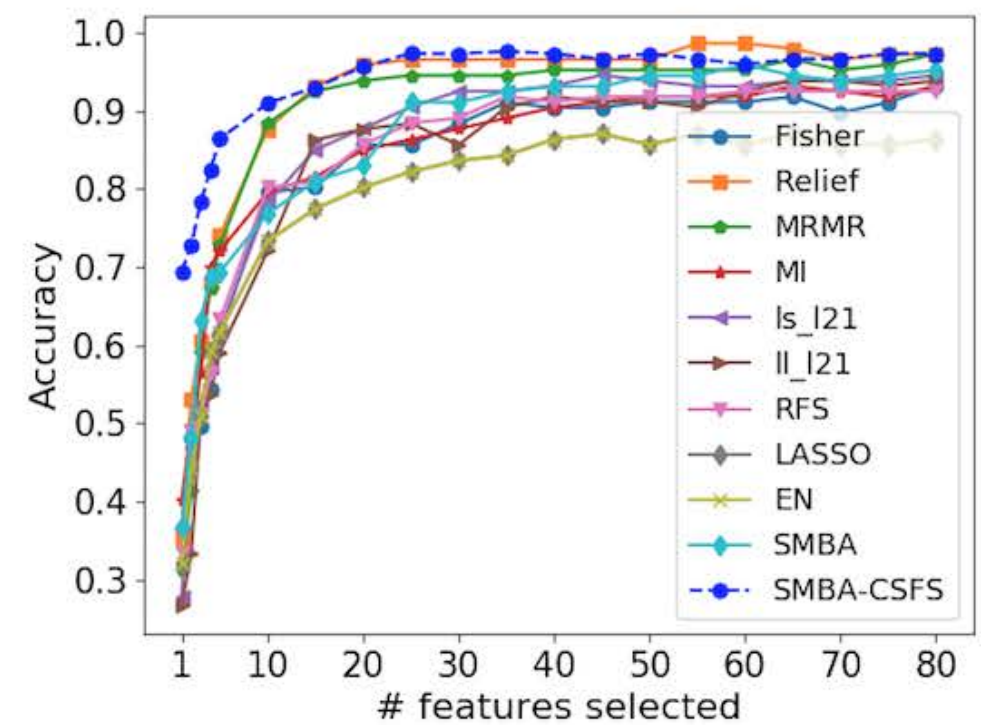

(f) LUNG\_D (7)

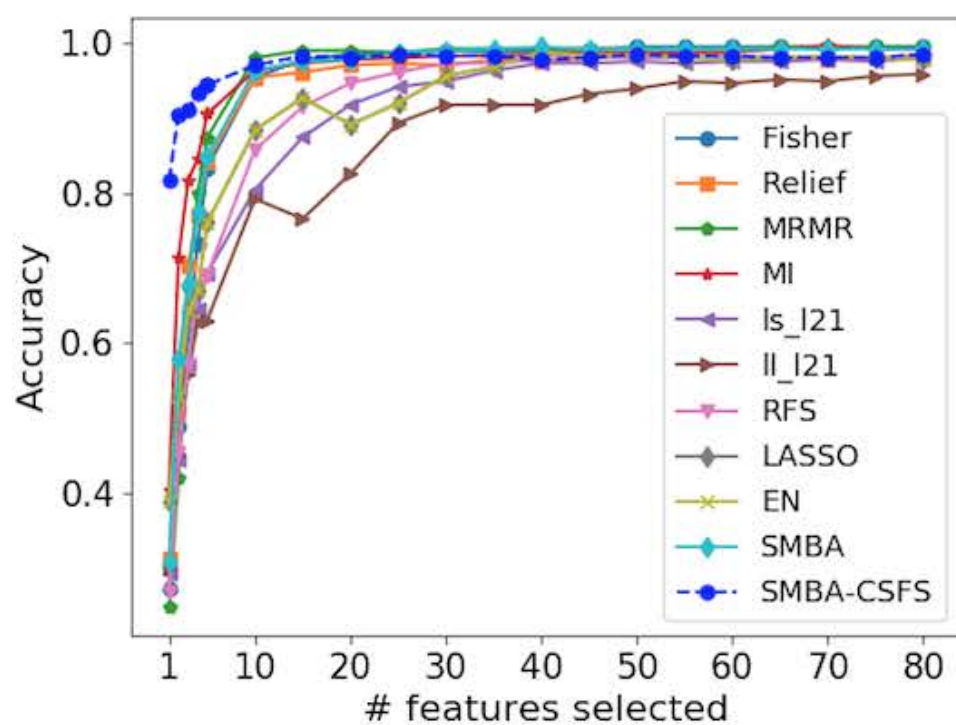

(g) DLBCL (9)

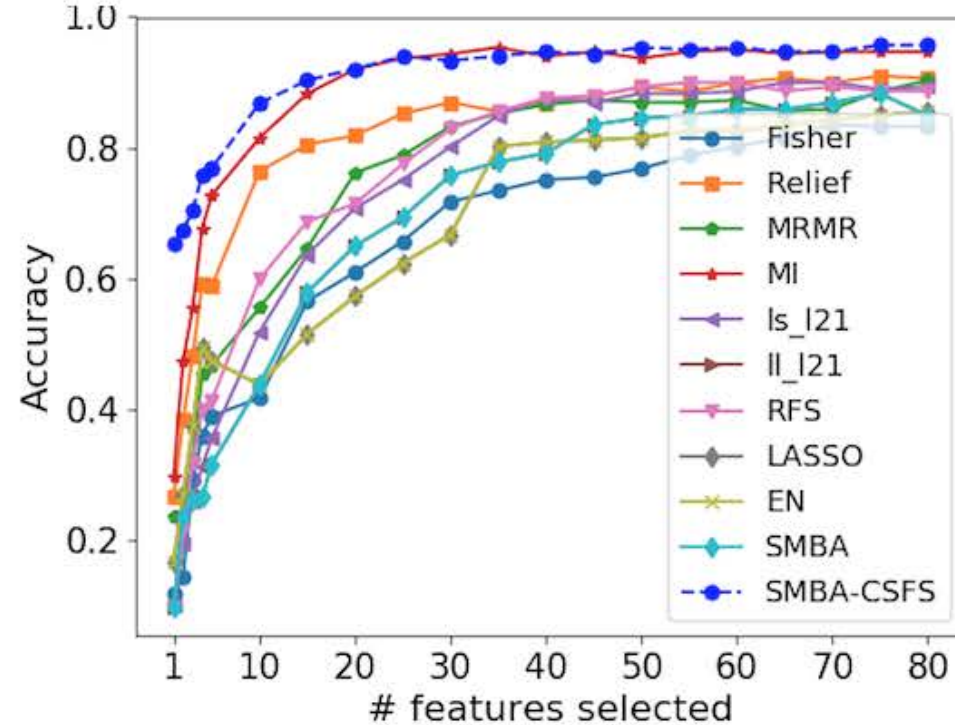

(h) CARCINOM (11)

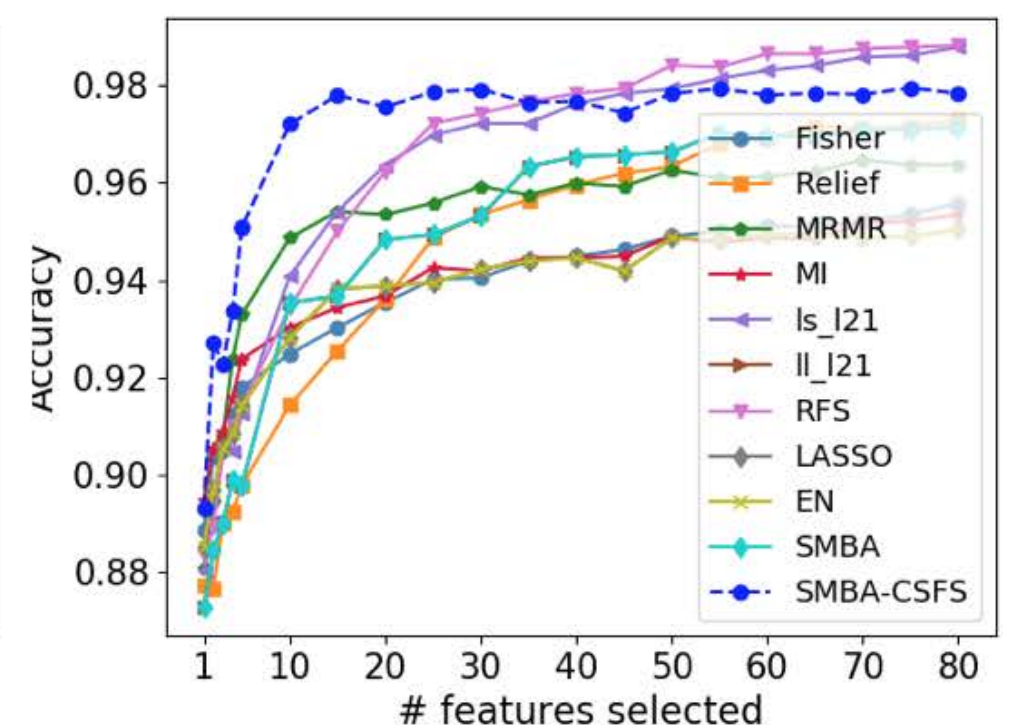

(i) GCM (14)

**Figure 1.** Comparison of several TFS accuracies against SMBA and SMBA-CSFS on nine data sets, when a varying number of features is selected. Naive Bayes classifier with 5-fold CV was used.

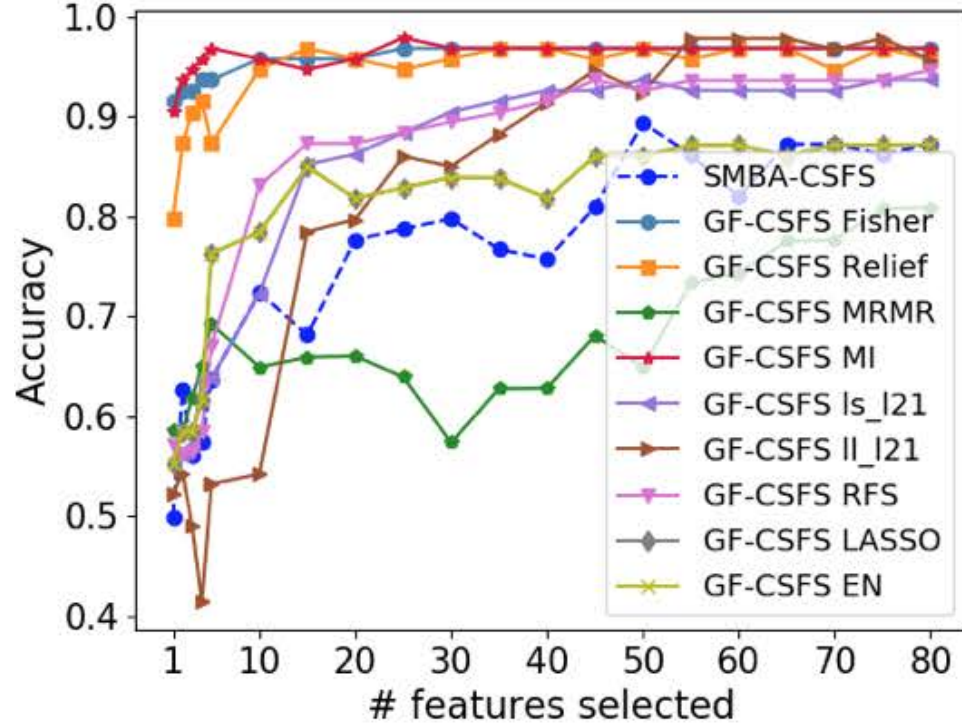

(a) ALLAML (2)

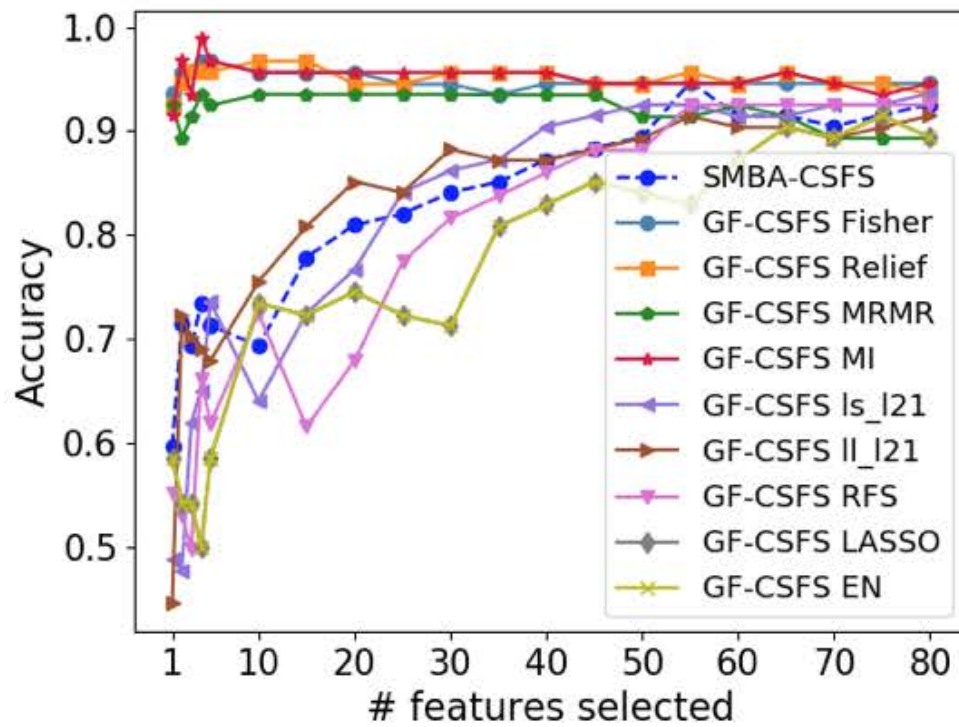

(b) LEUKEMIA (2)

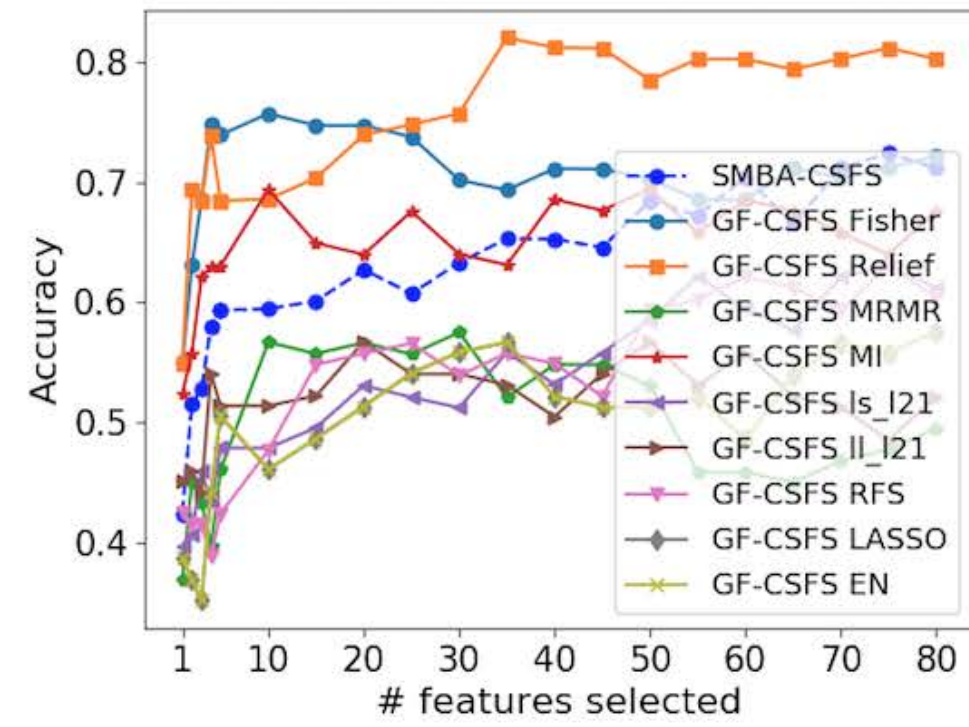

(c) CLL\_SUB\_111 (3)

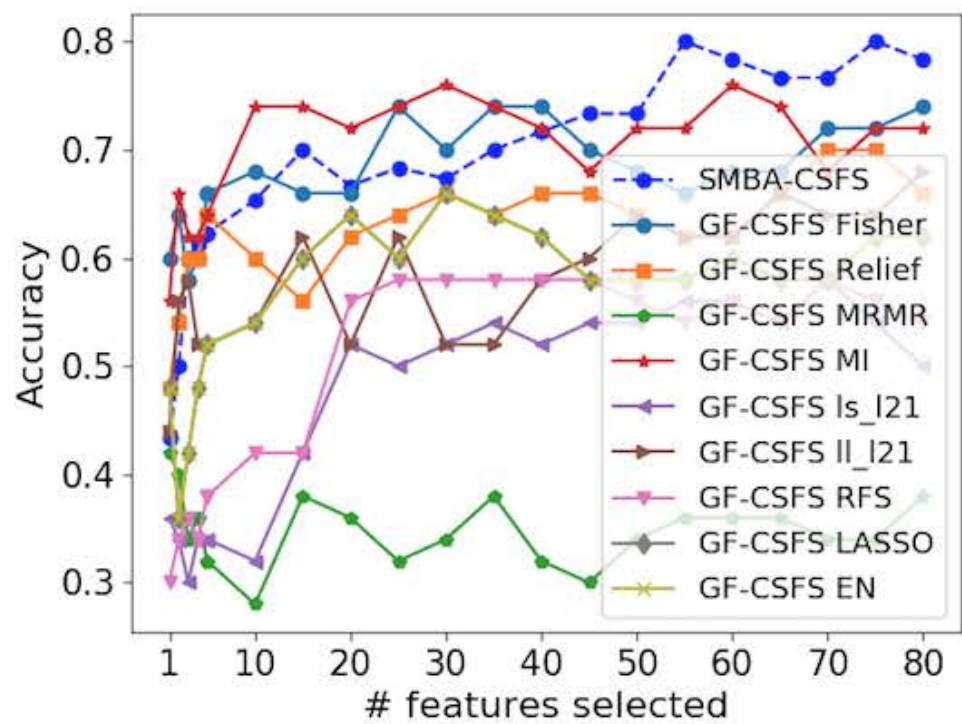

(d) GLIOMA (4)

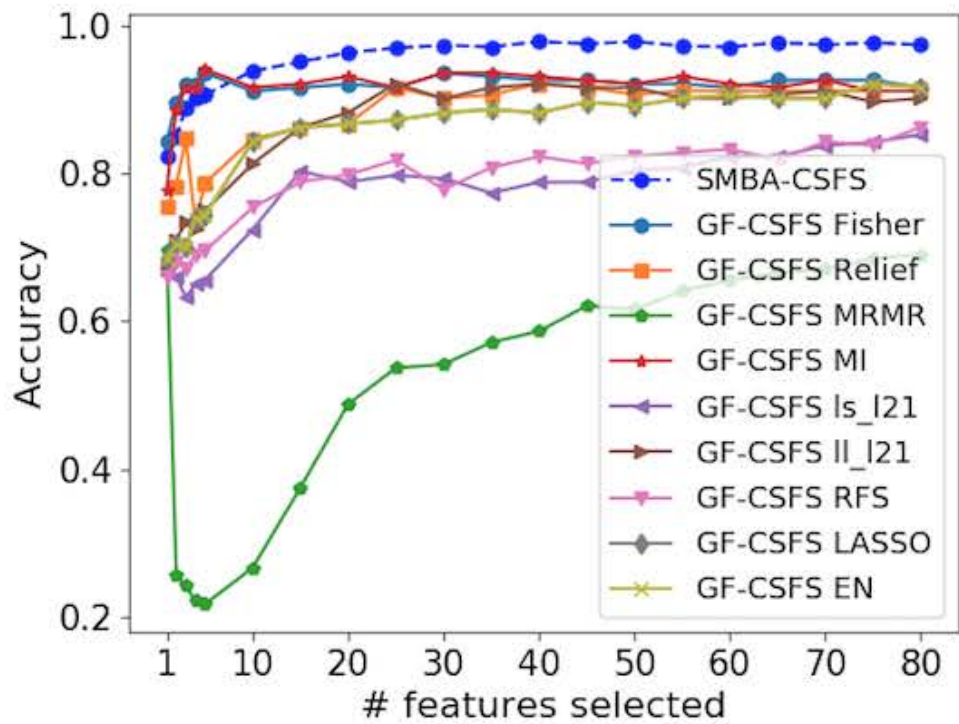

(e) LUNG\_C (5)

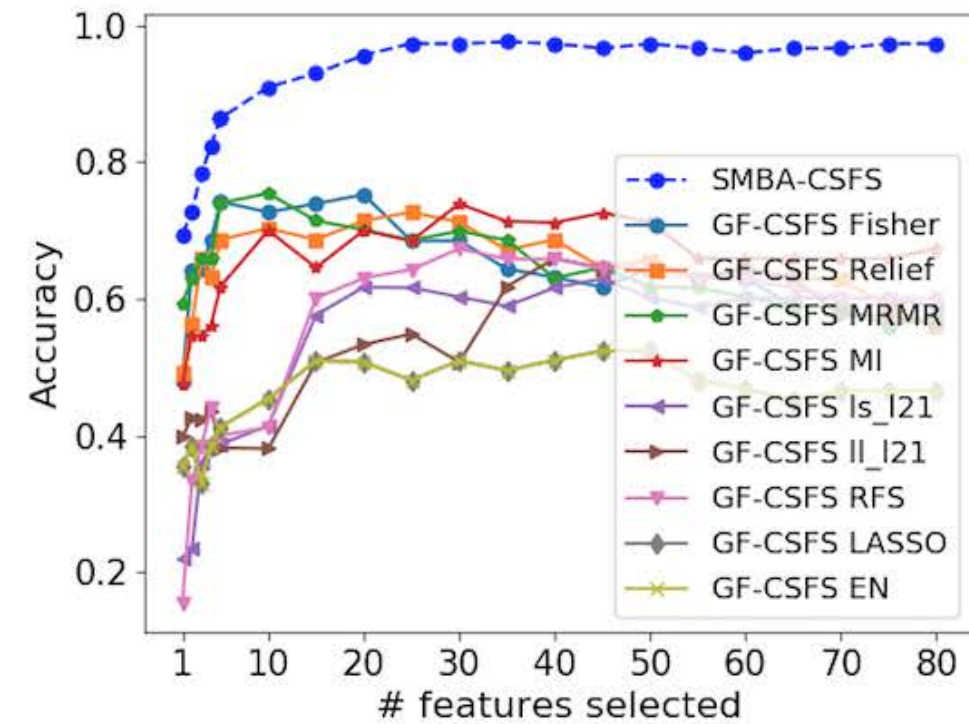

(f) LUNG\_D (7)

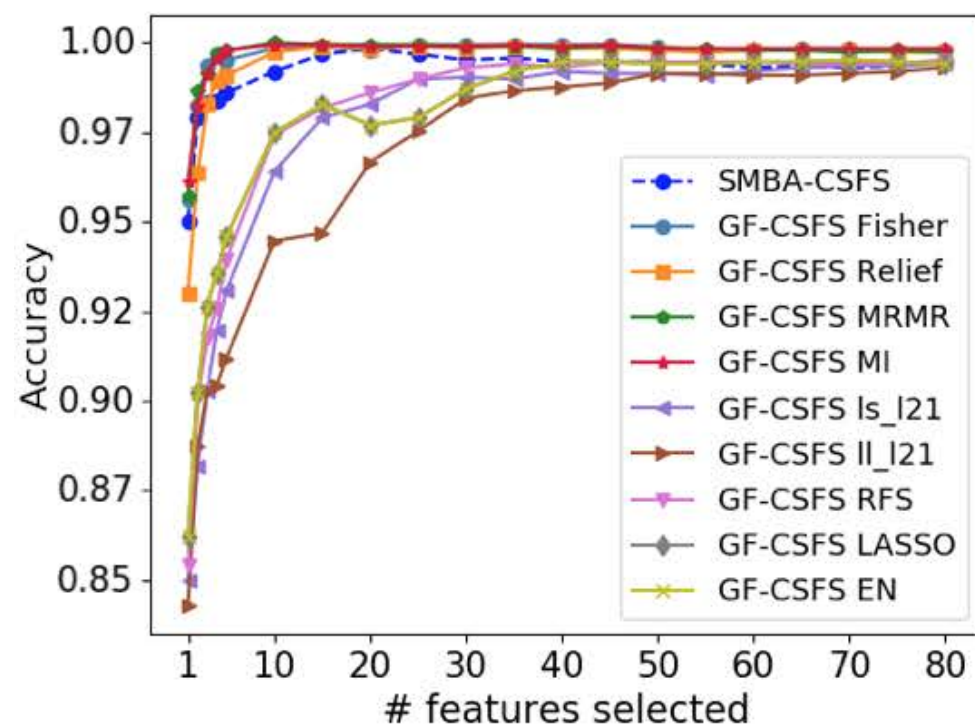

(g) DLBCL (9)

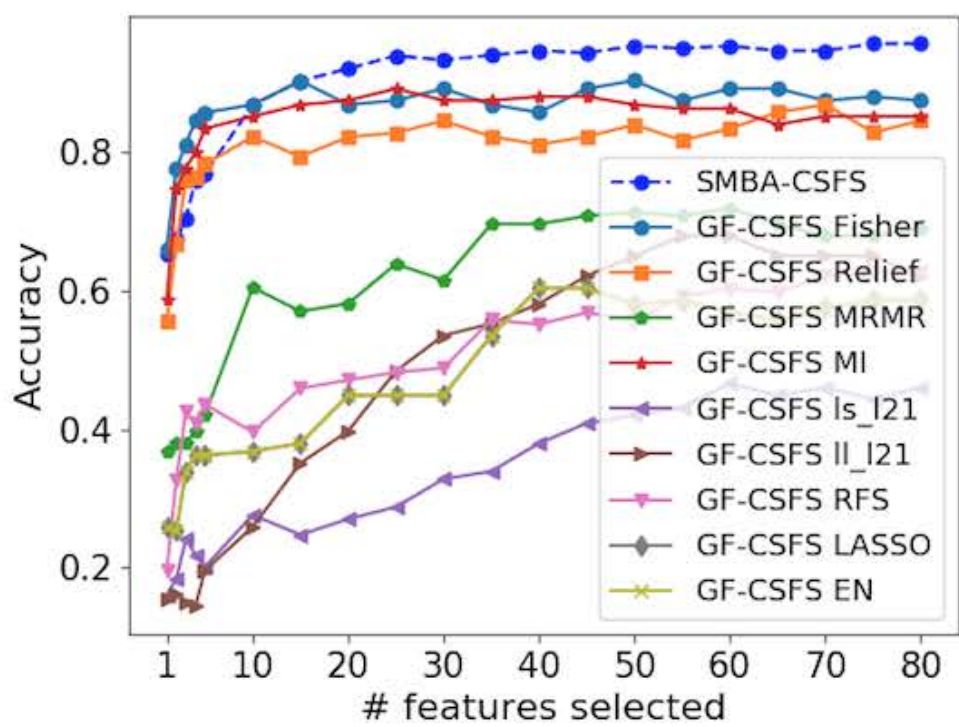

(h) CARCINOM (11)

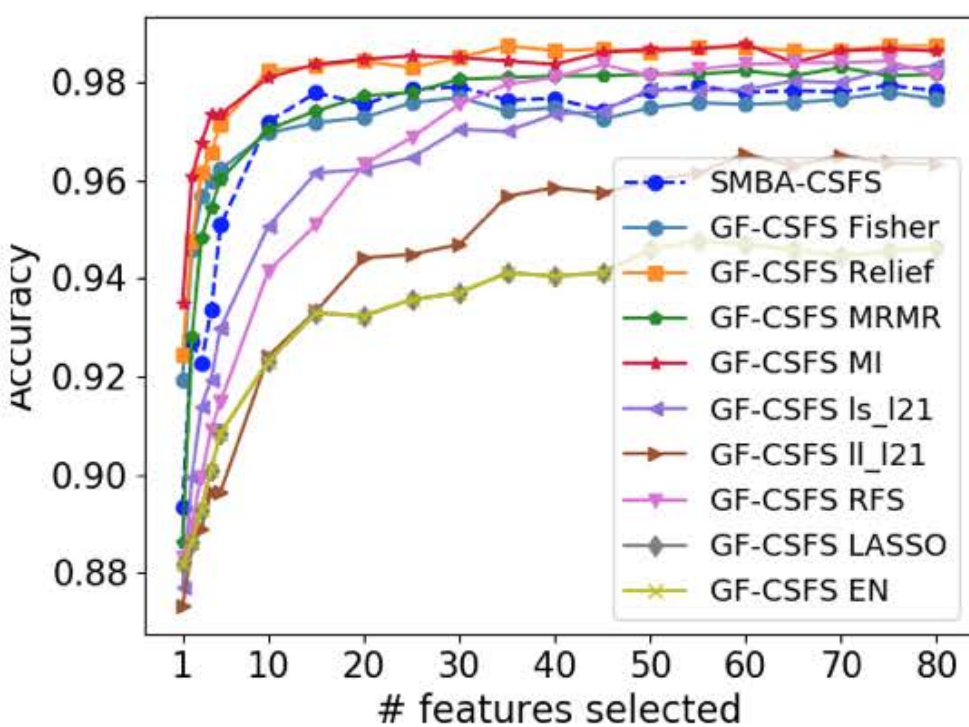

(i) GCM (14)

**Figure 2.** Comparison of several CSFS accuracies against SMBA and SMBA-CSFS on nine data sets, when a varying number of features is selected. Naive Bayes classifier with 5-fold CV was used.

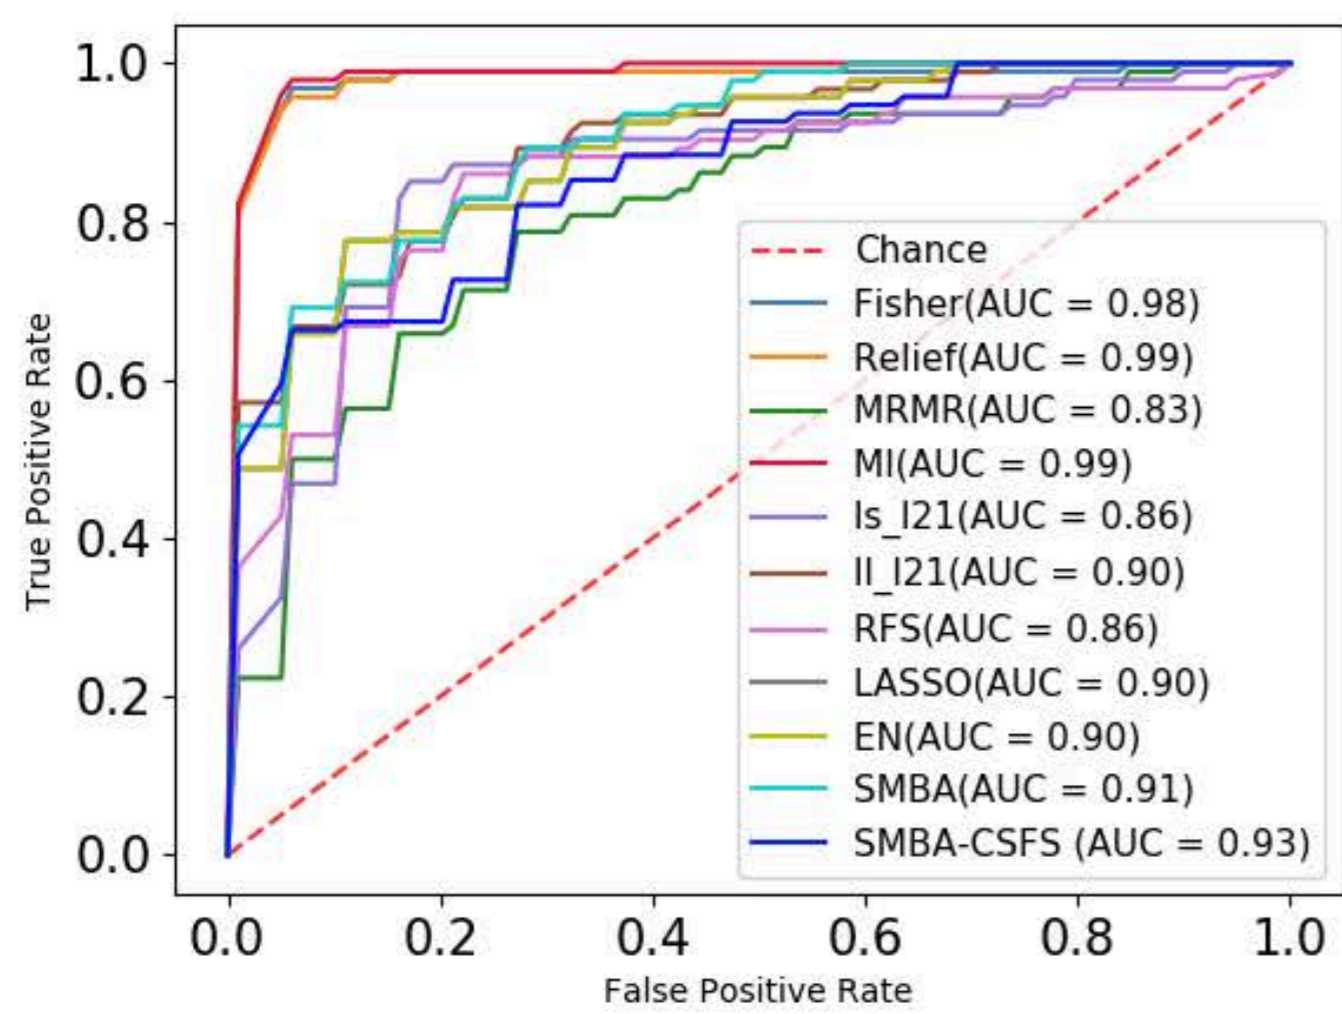

(a) ALLAML (2)

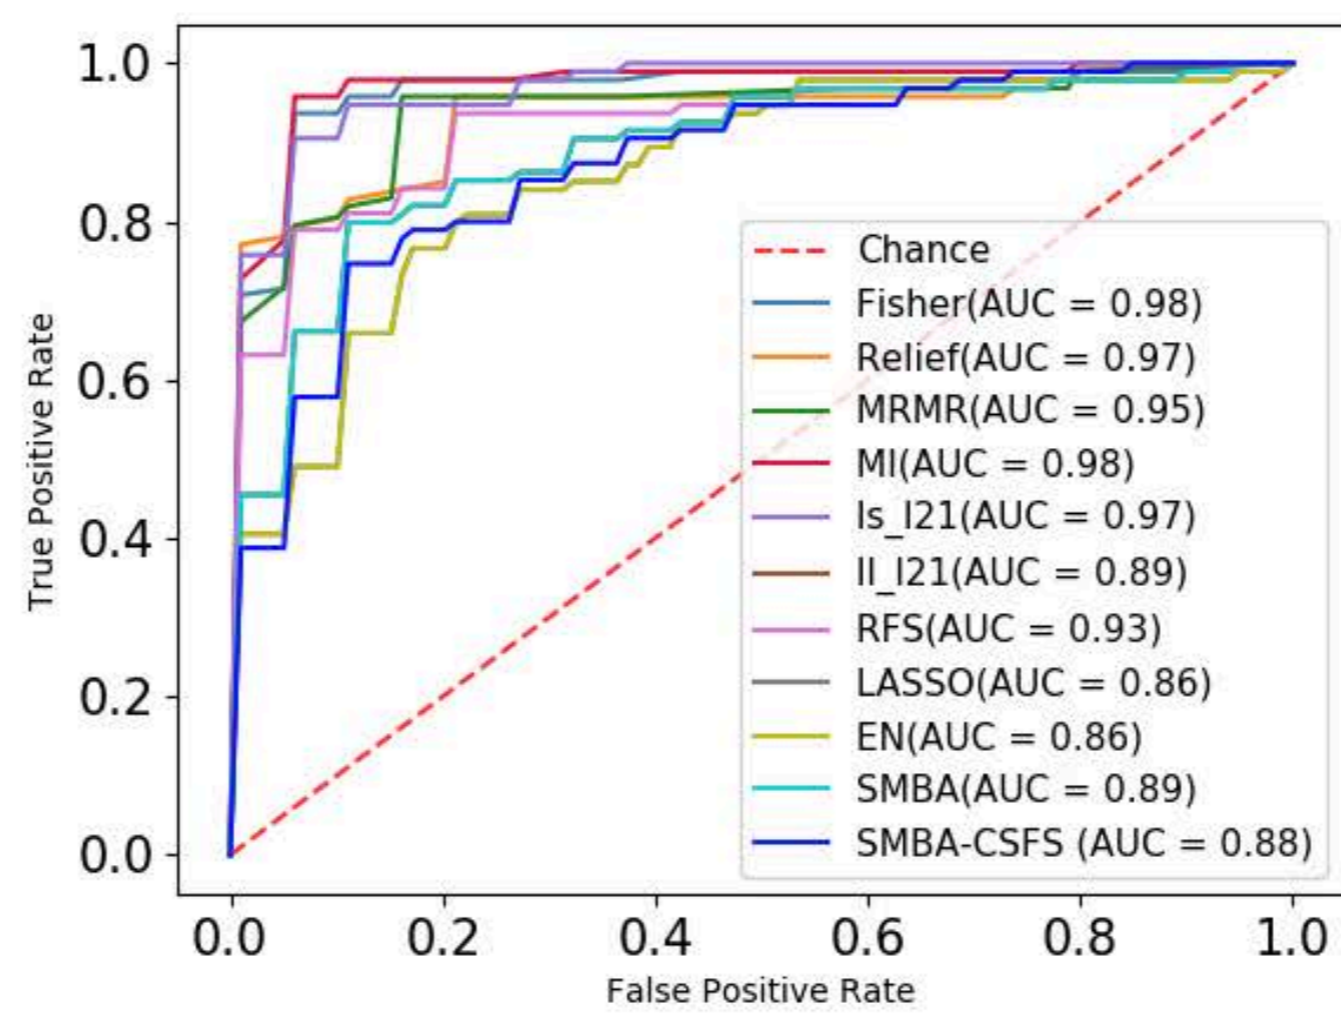

(b) LEUKEMIA (2)

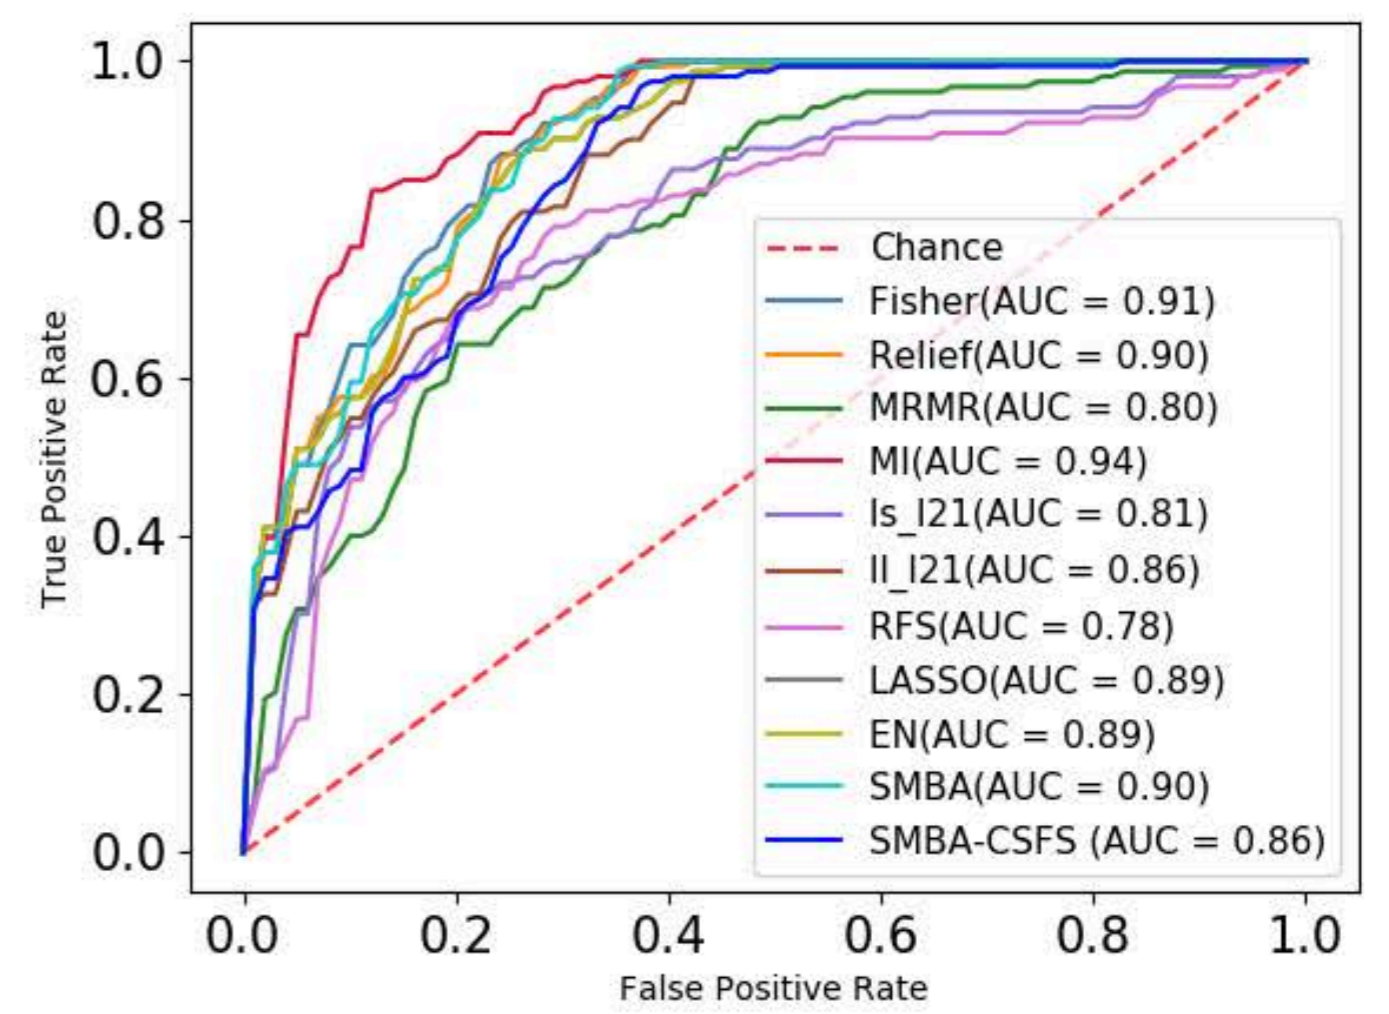

(c) CLL\_SUB\_111 (3)

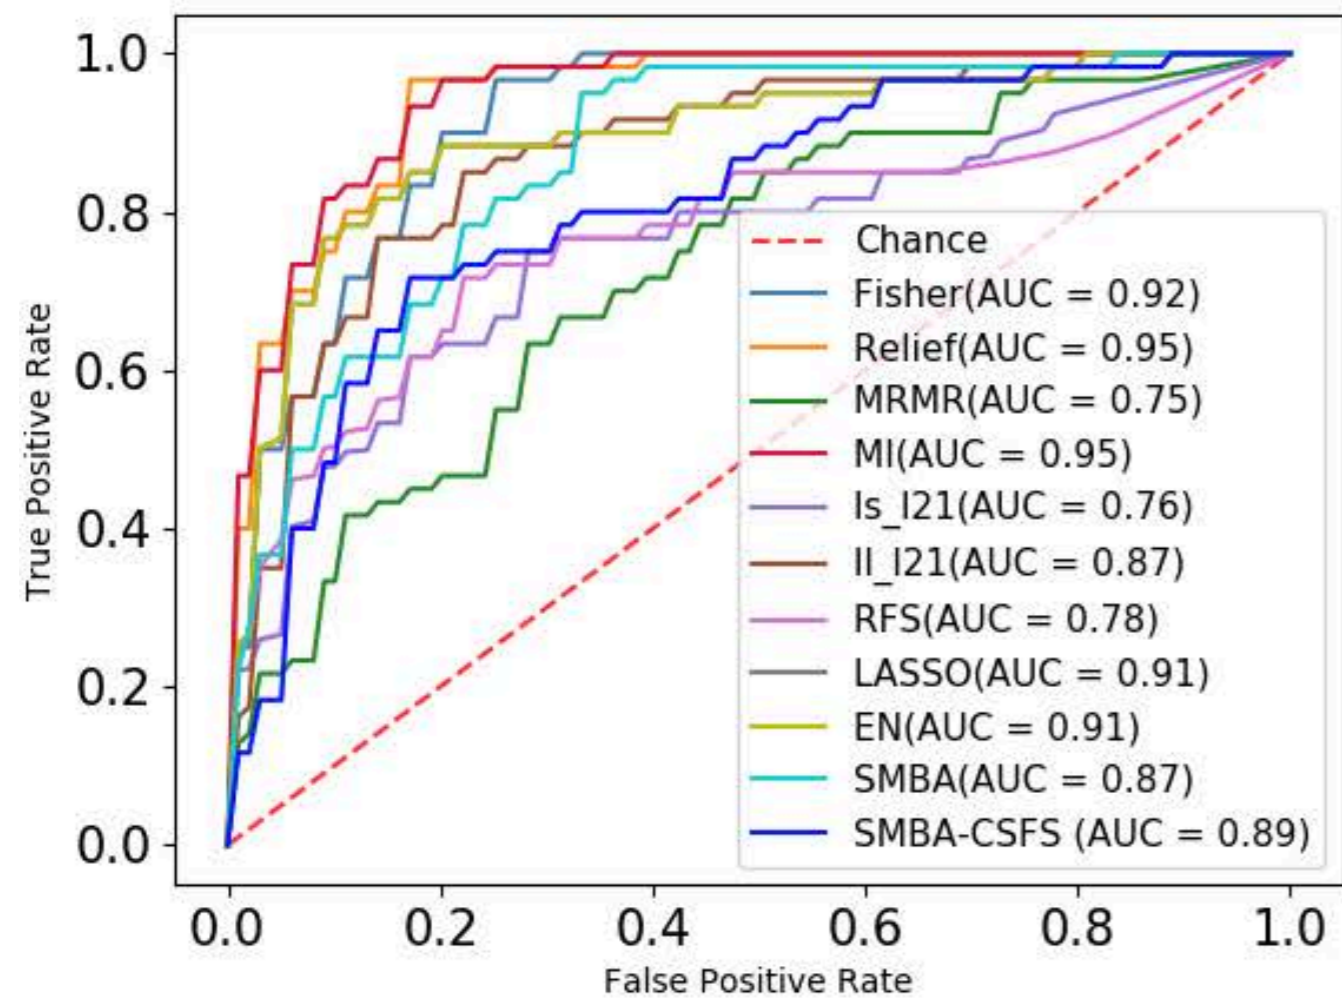

(d) GLIOMA (4)

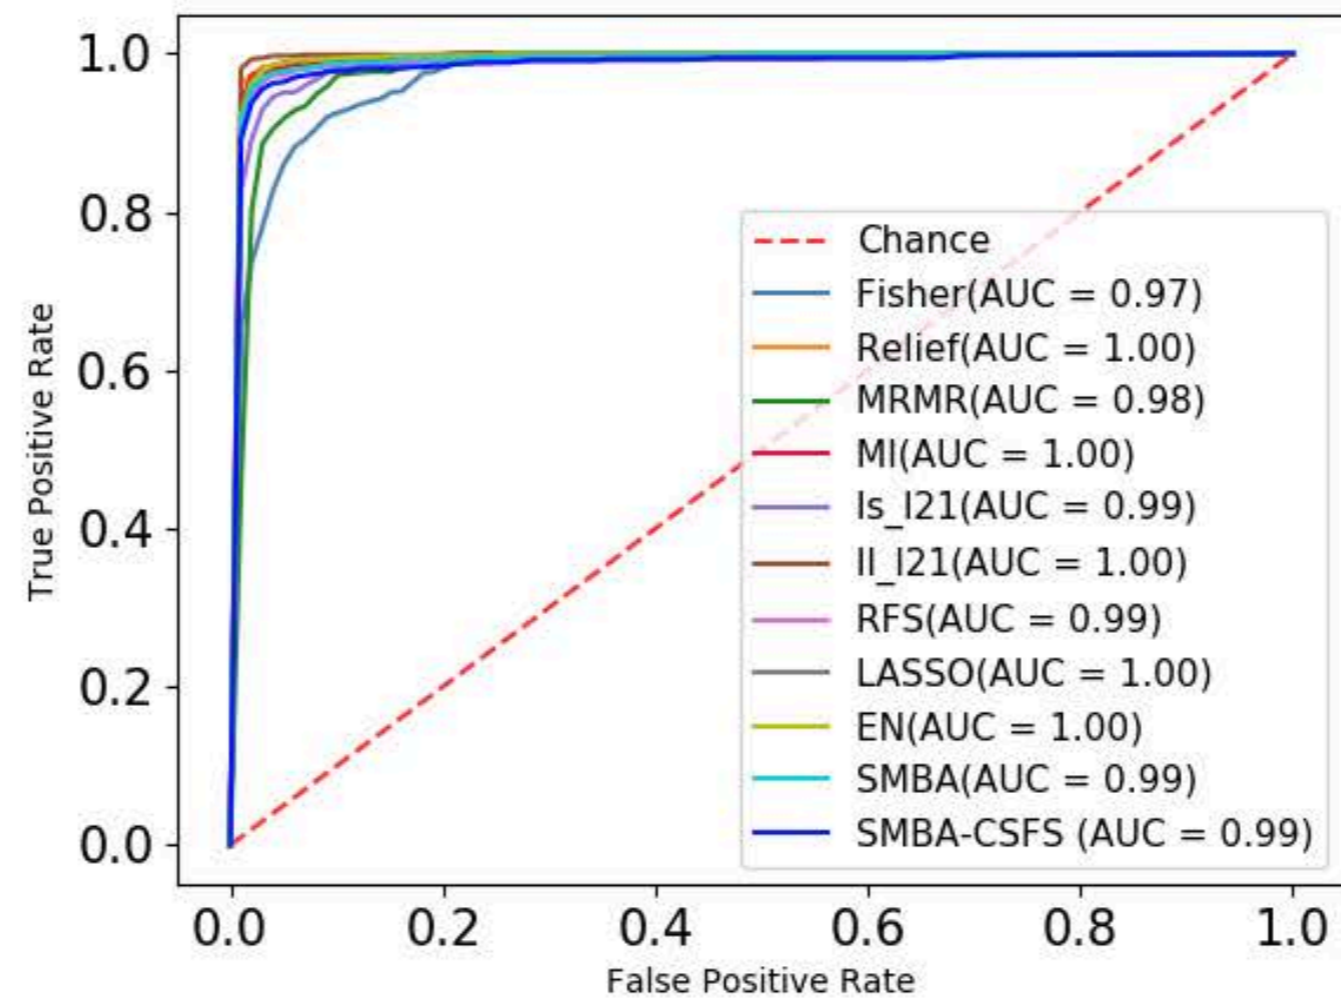

(e) LUNG\_C (5)

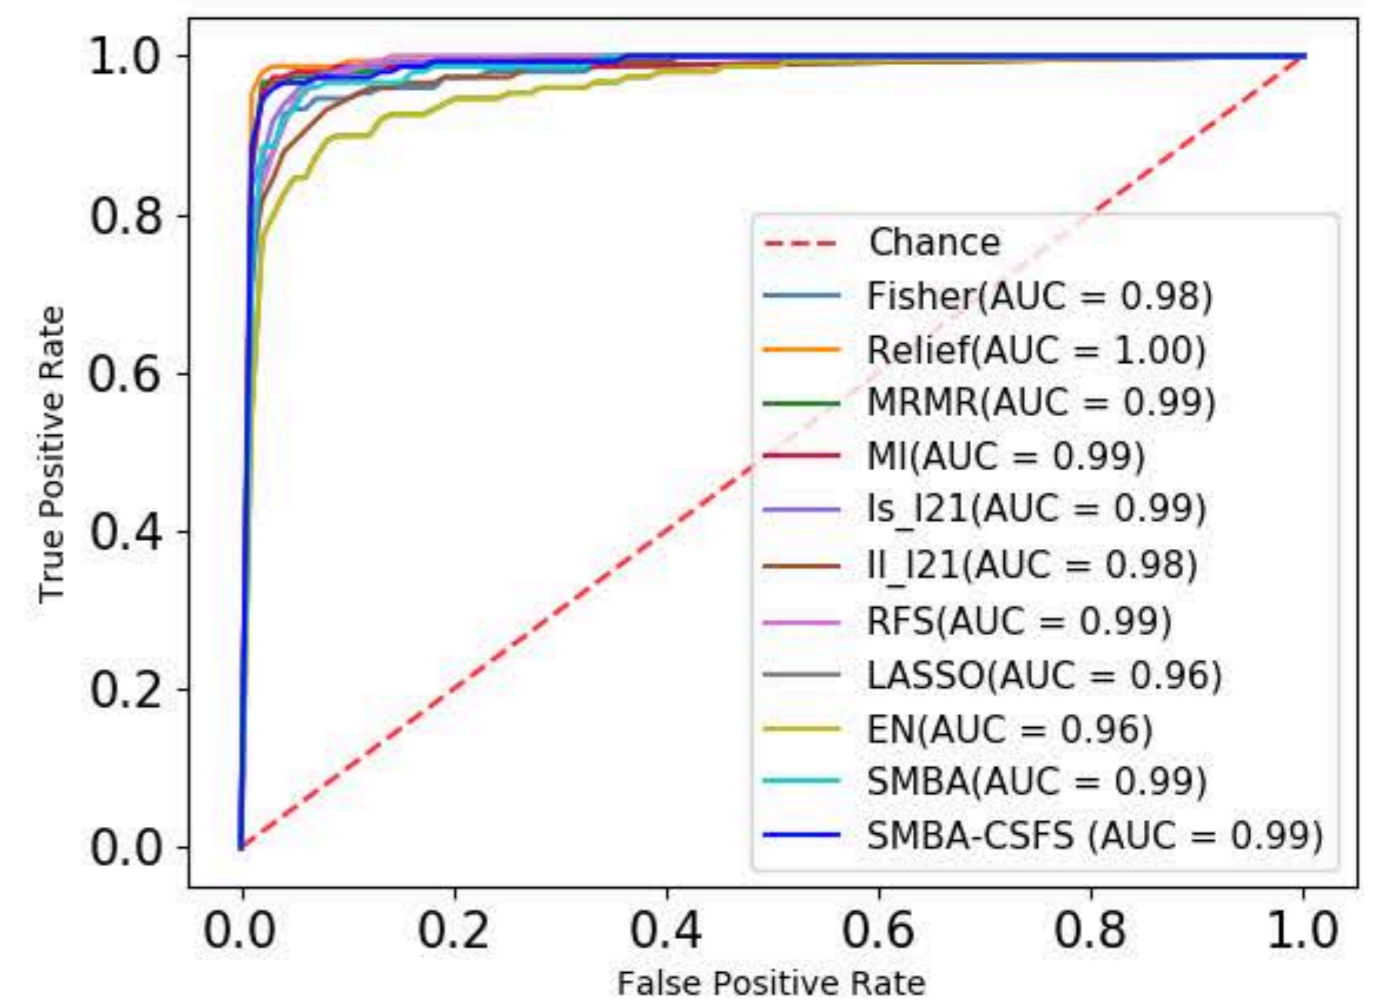

(f) LUNG\_D (7)

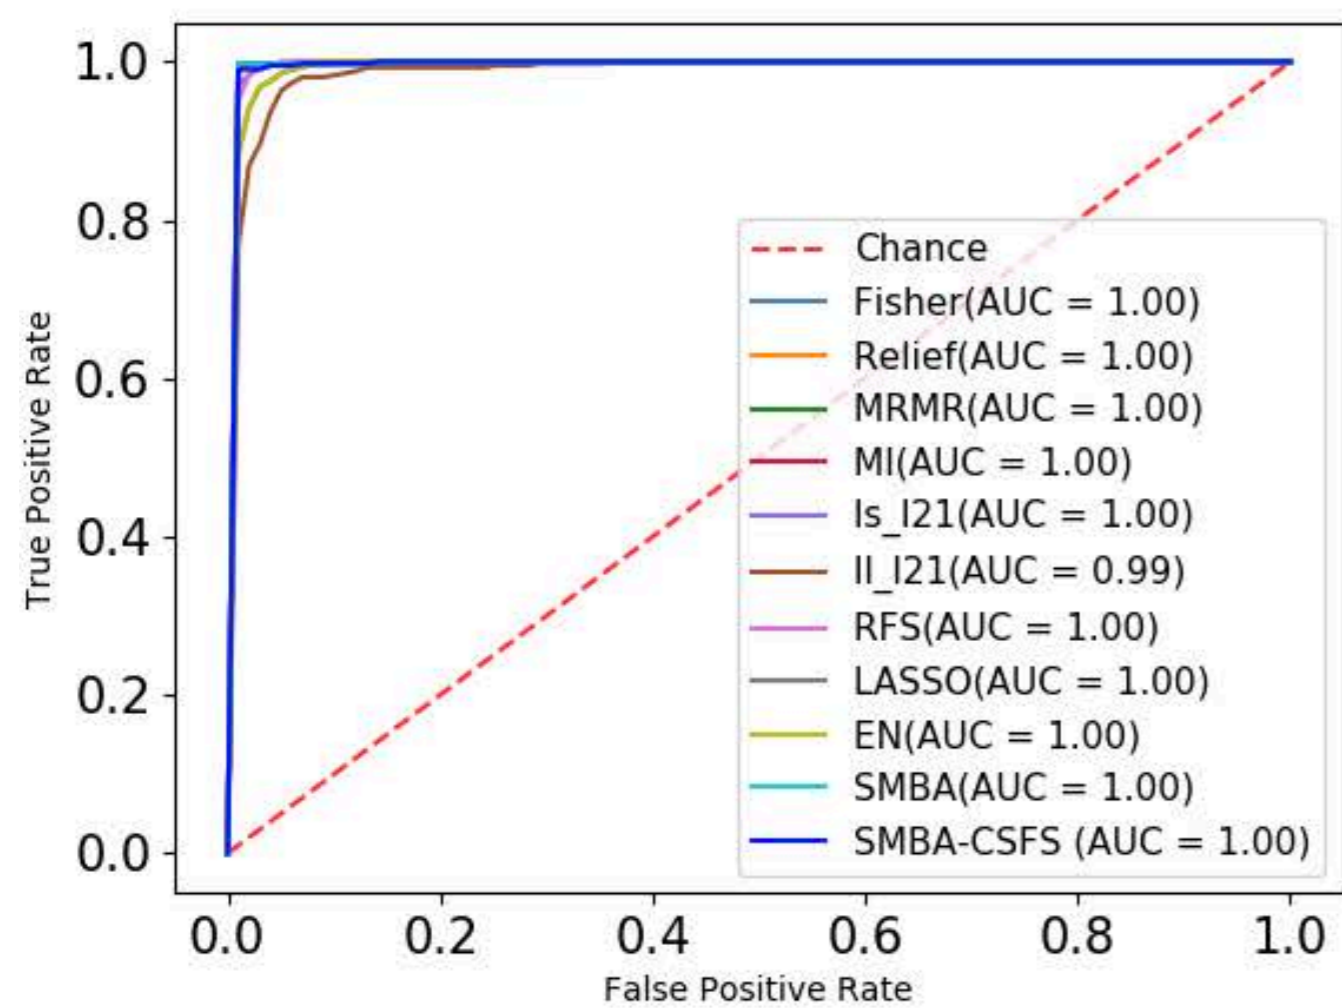

(g) DLBCL (9)

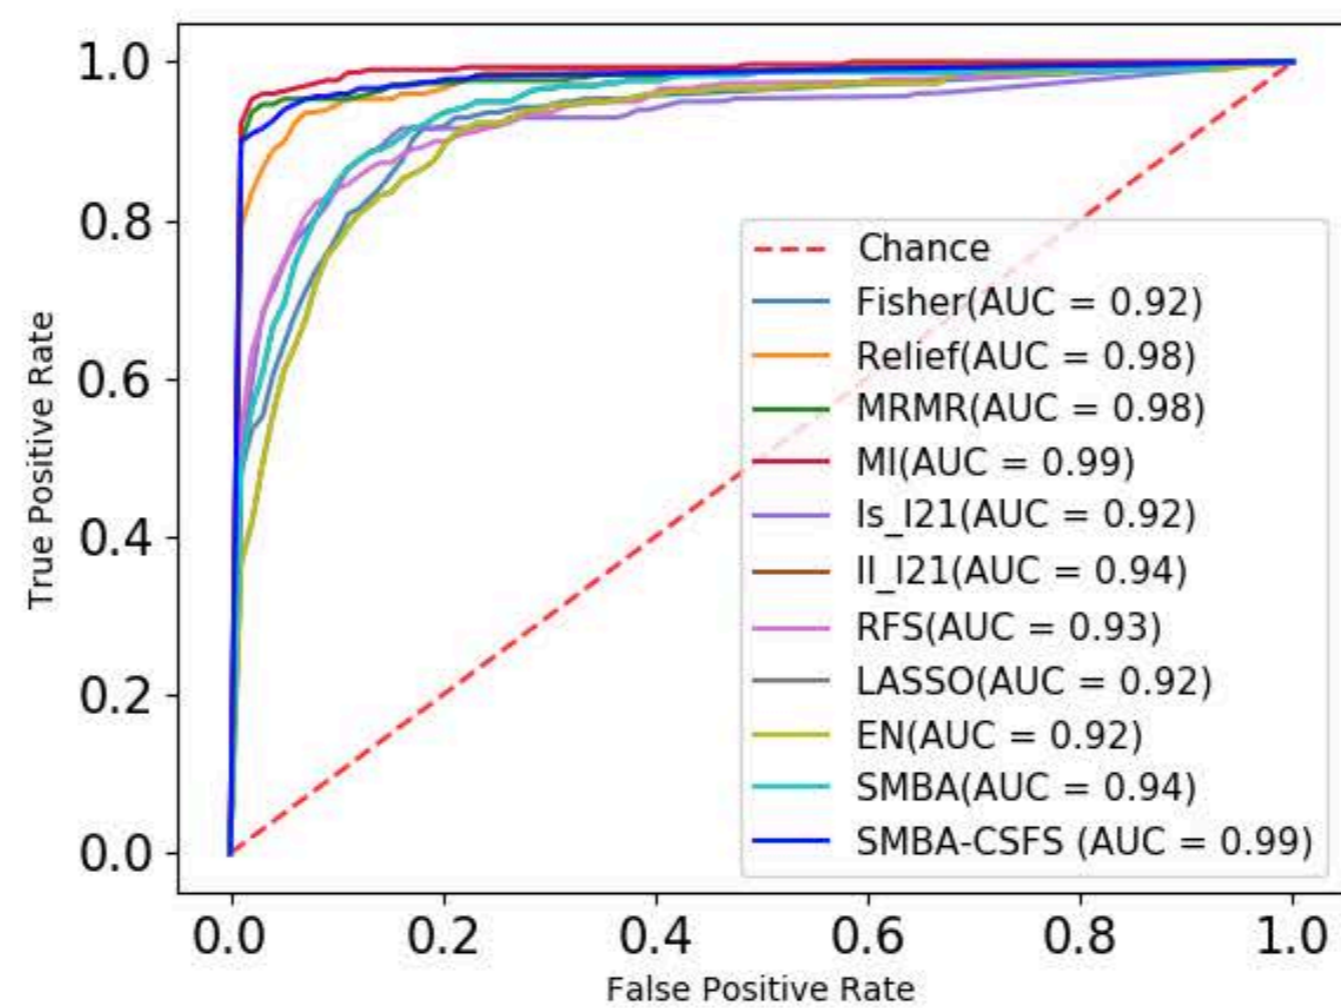

(h) CARCINOM (11)

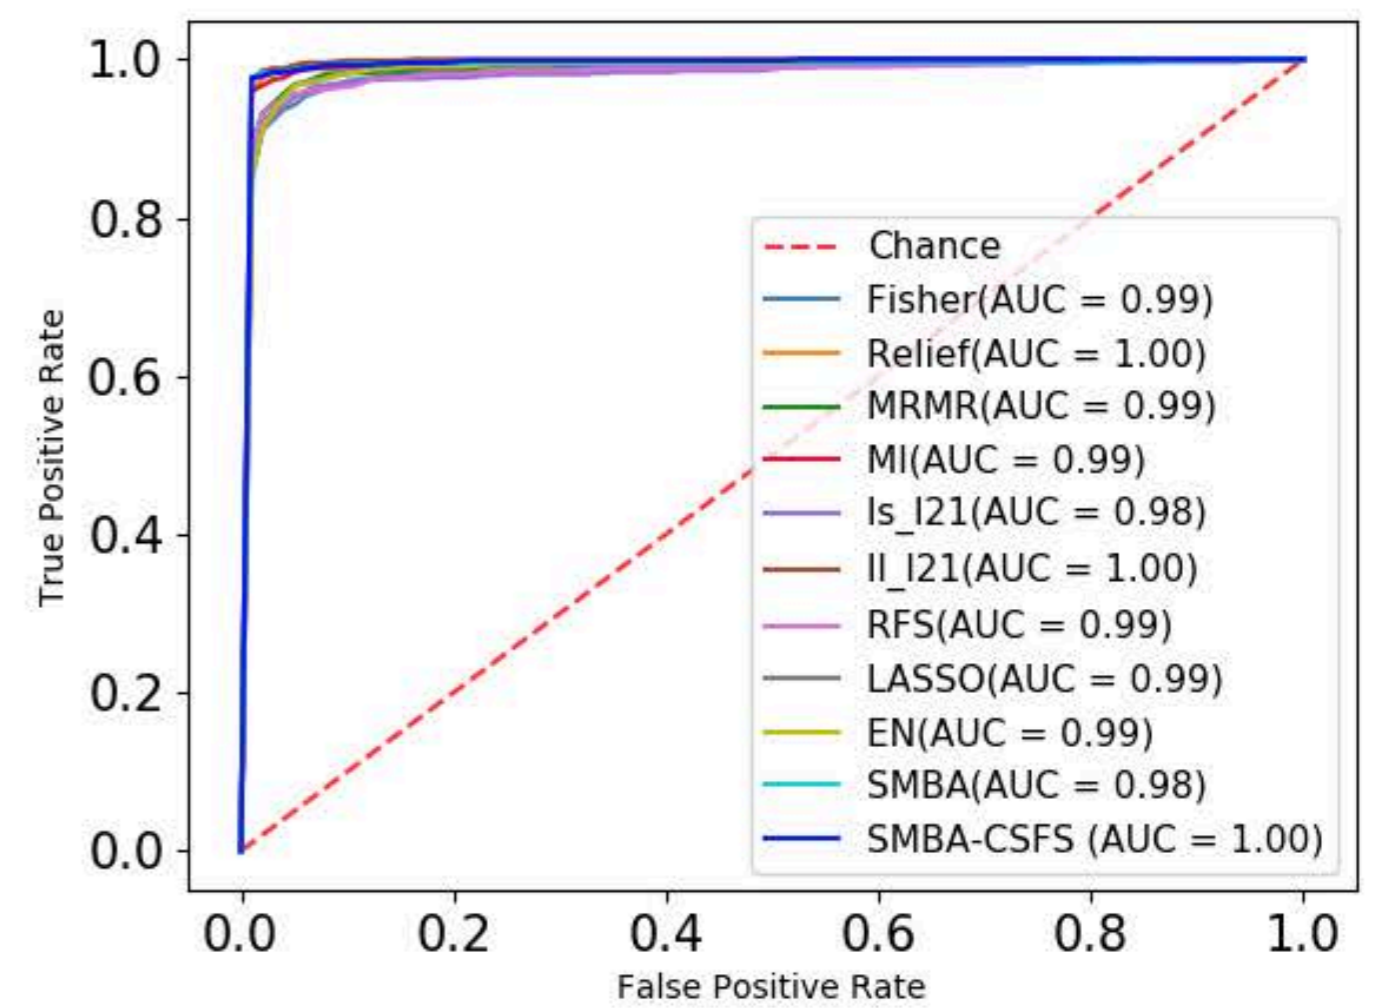

(i) GCM (14)

**Figure 3.** Averaged ROC curves comparing the performance among SMBA-CSFS and TFS methods for the classification of nine data sets on the first 20 features. Naive Bayes classifier with 5-fold CV was used.

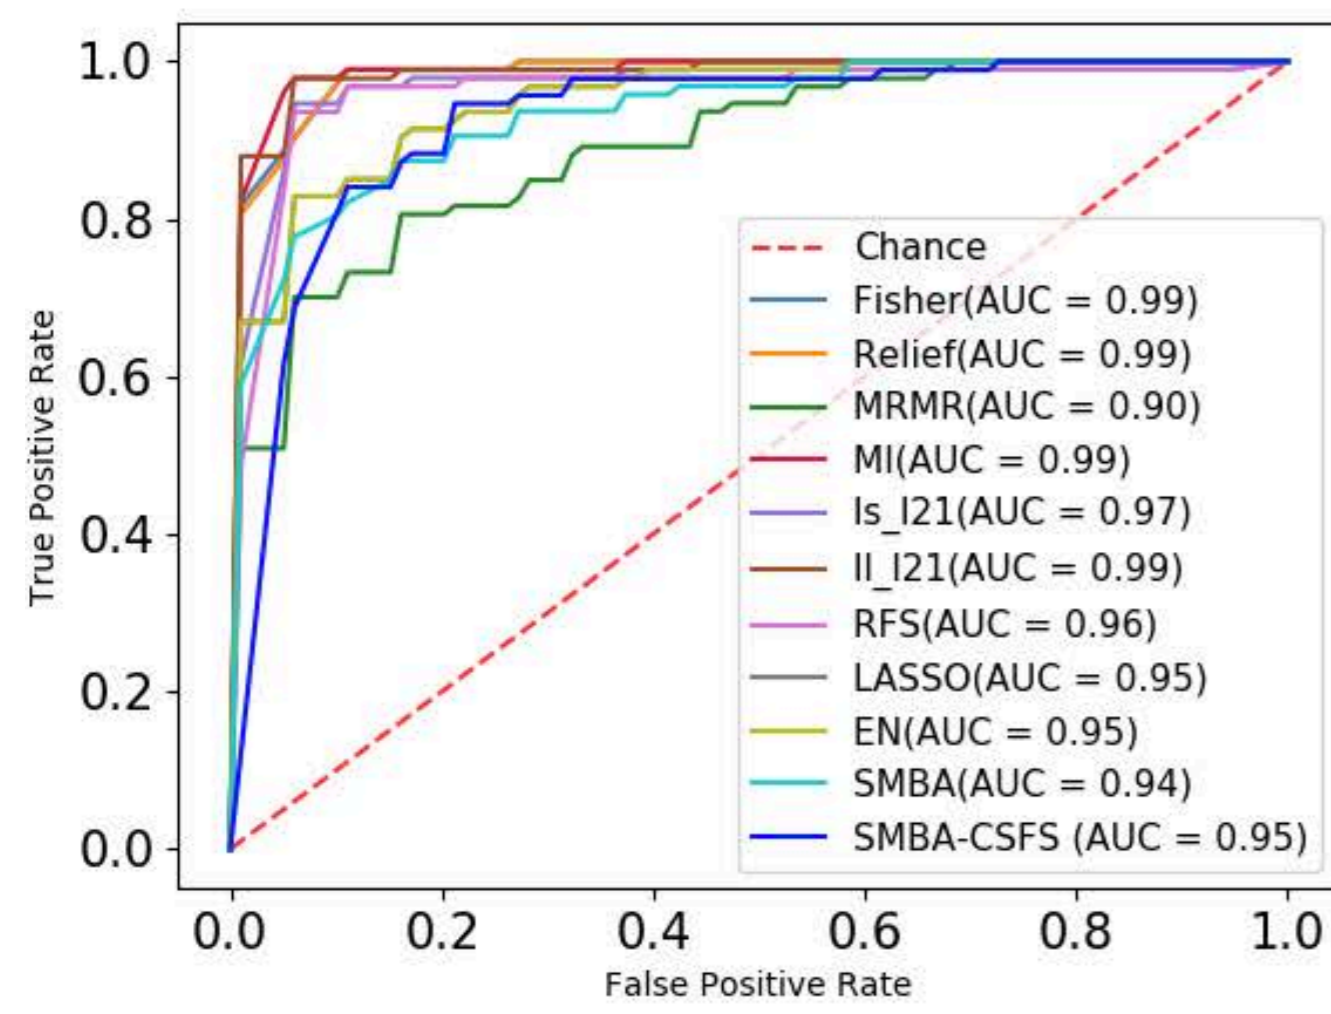

(a) ALLAML (2)

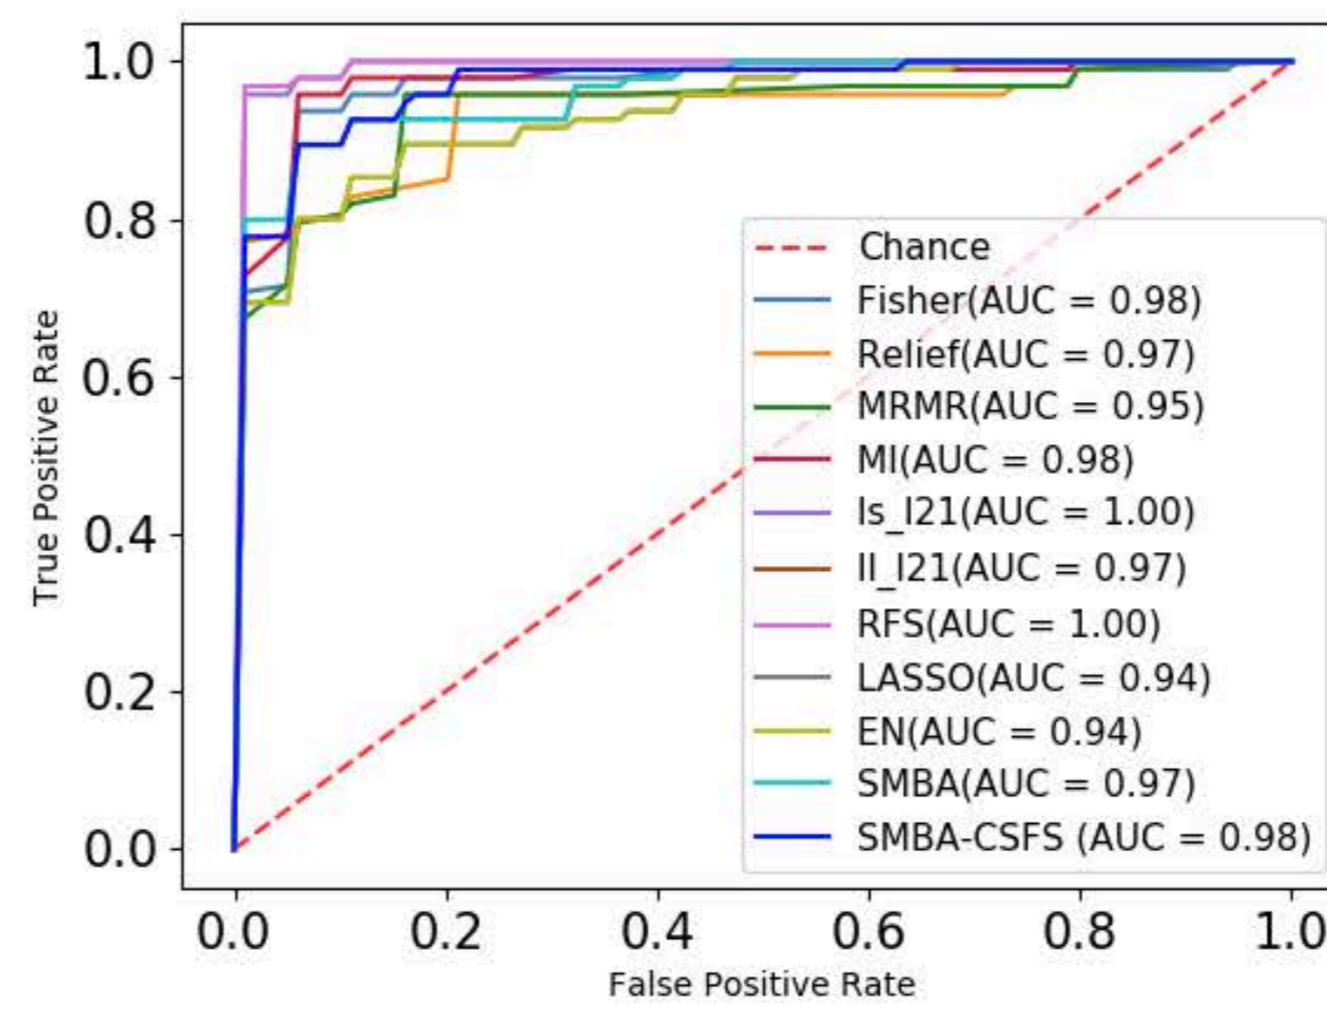

(b) LEUKEMIA (2)

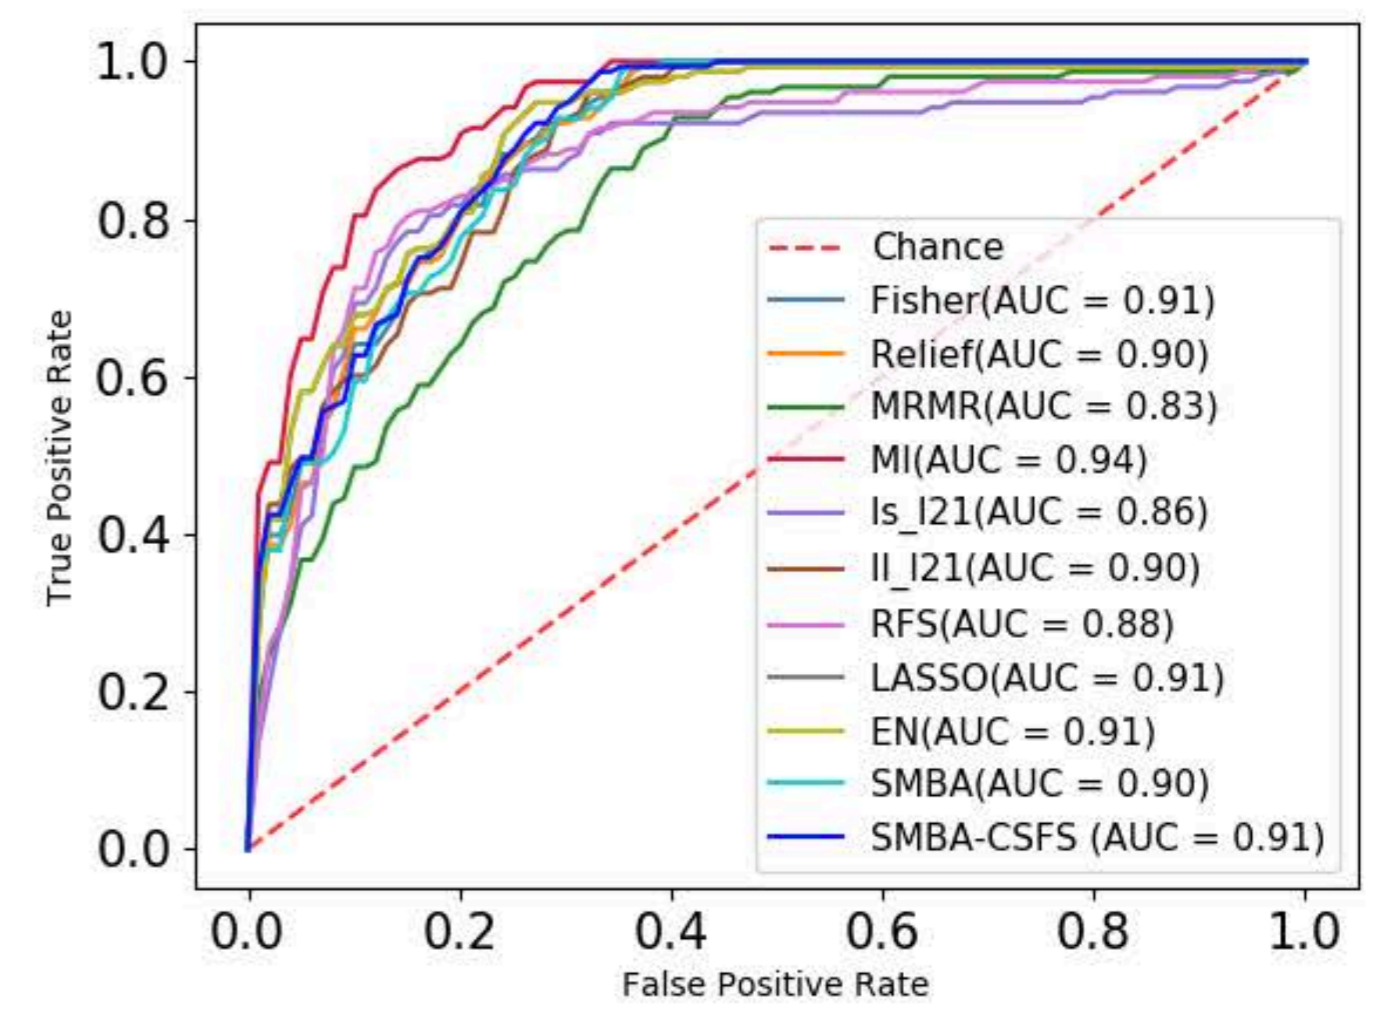

(c) CLL\_SUB\_111 (3)

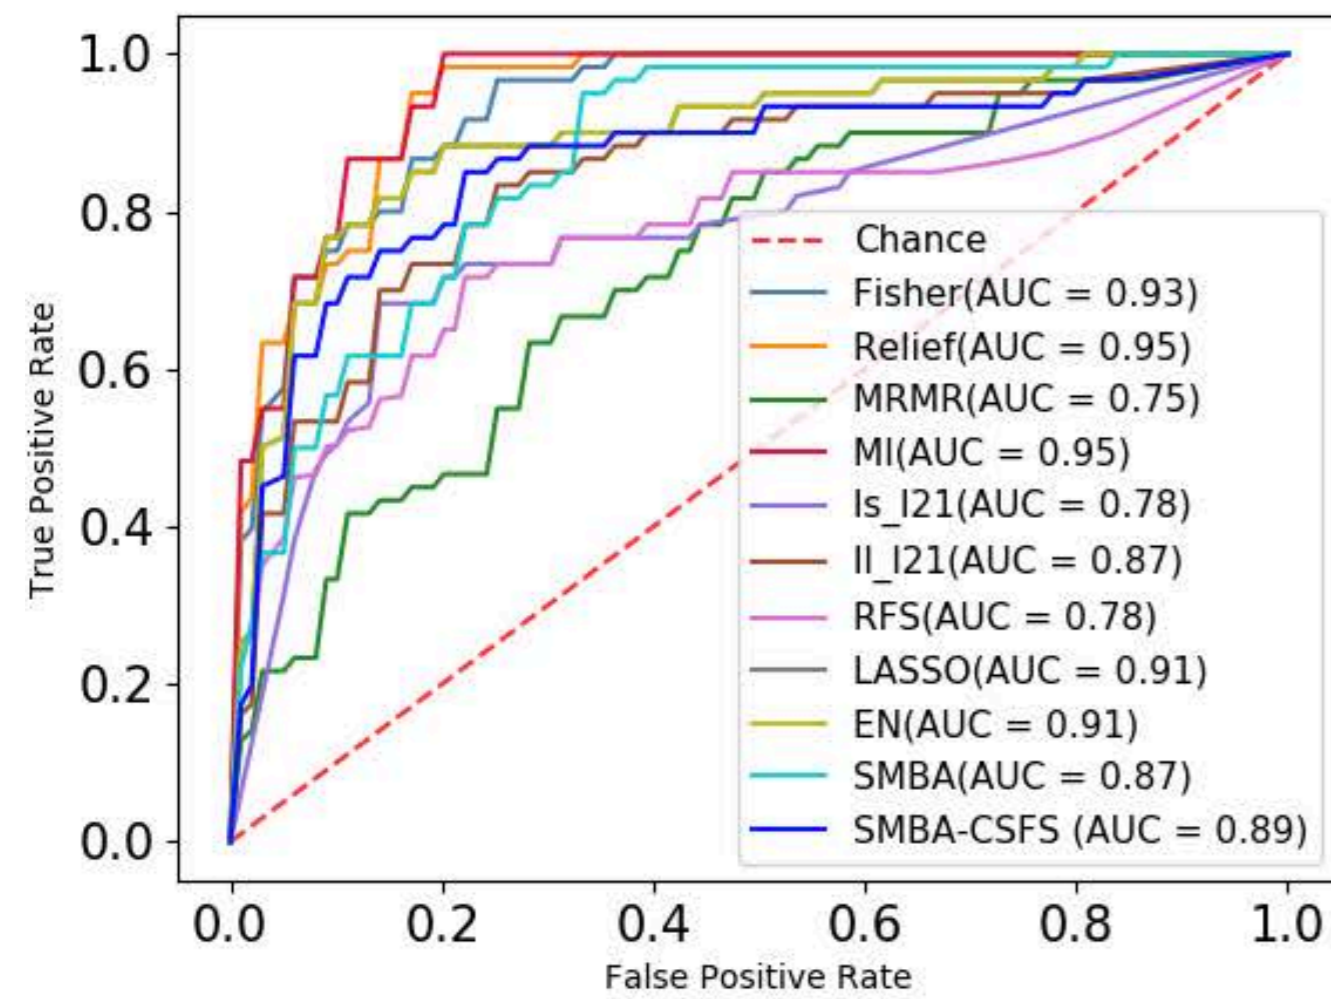

(d) GLIOMA (4)

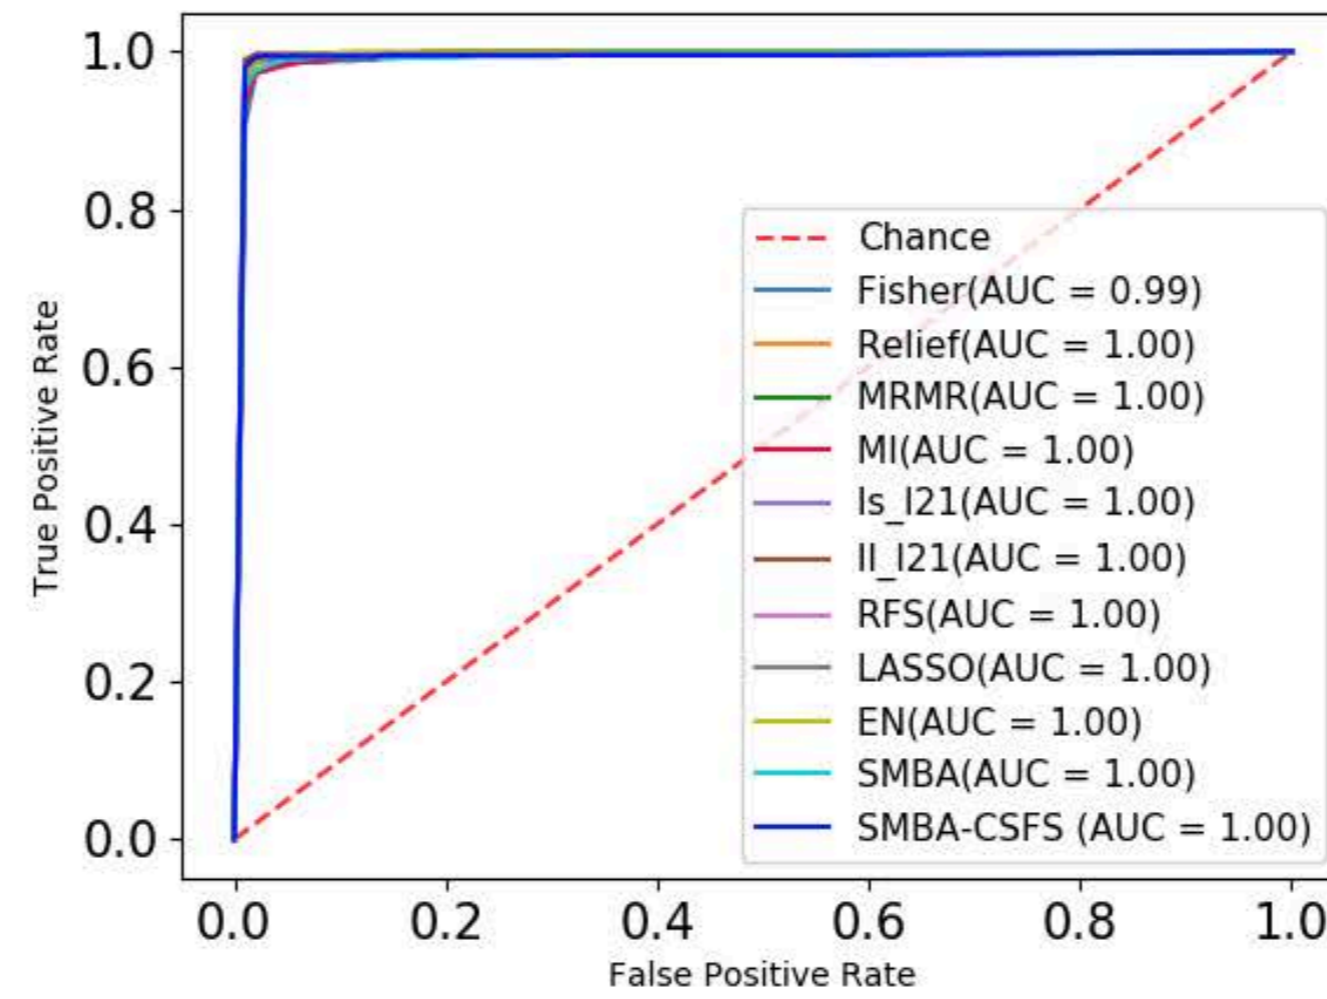

(e) LUNG\_C (5)

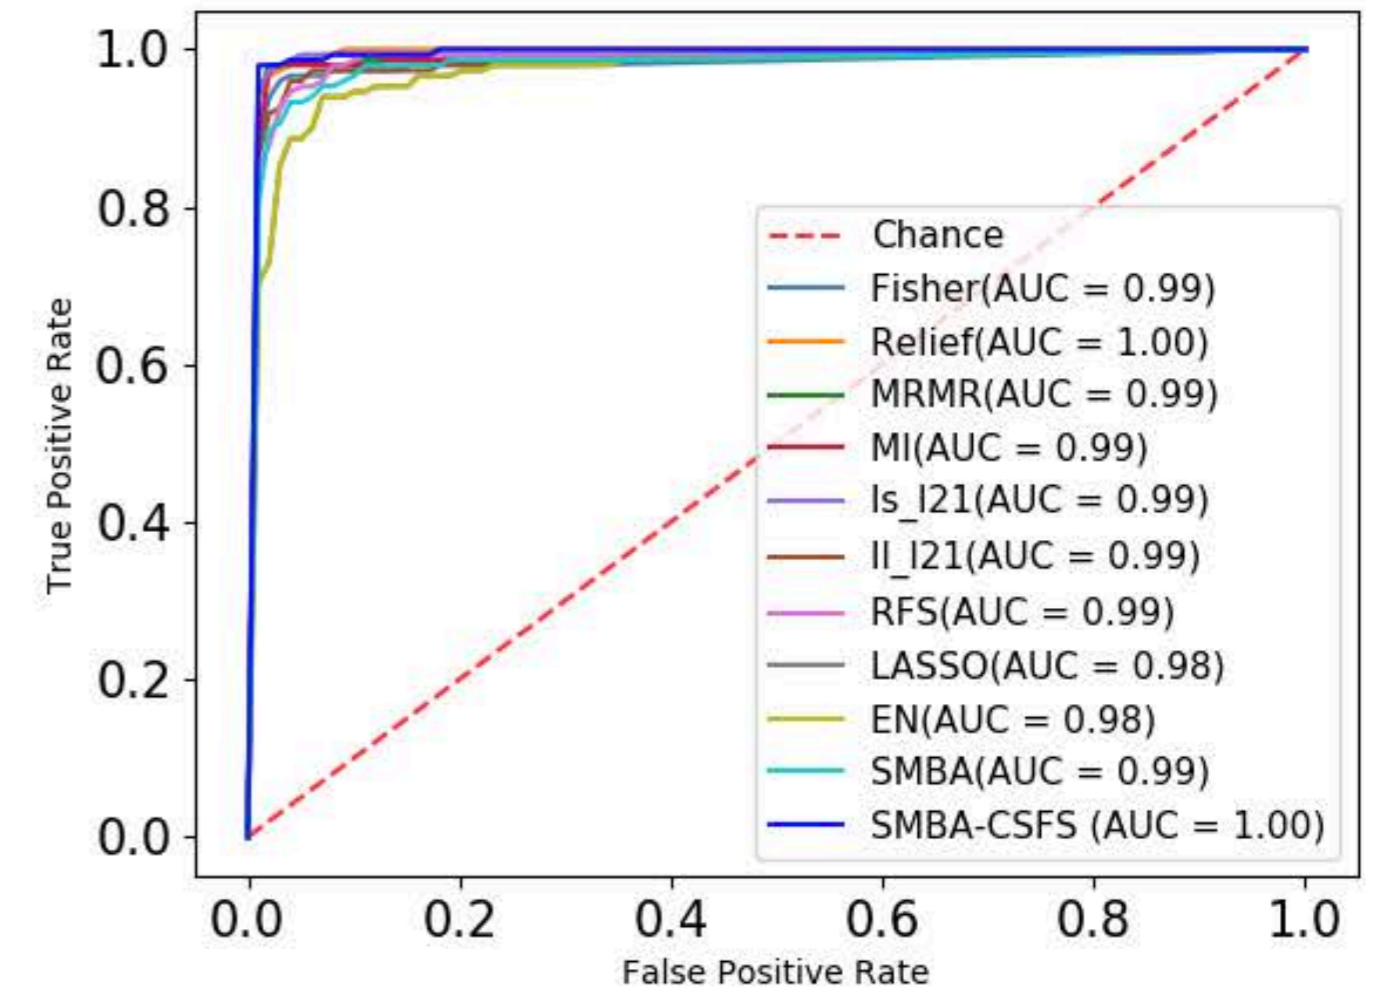

(f) LUNG\_D (7)

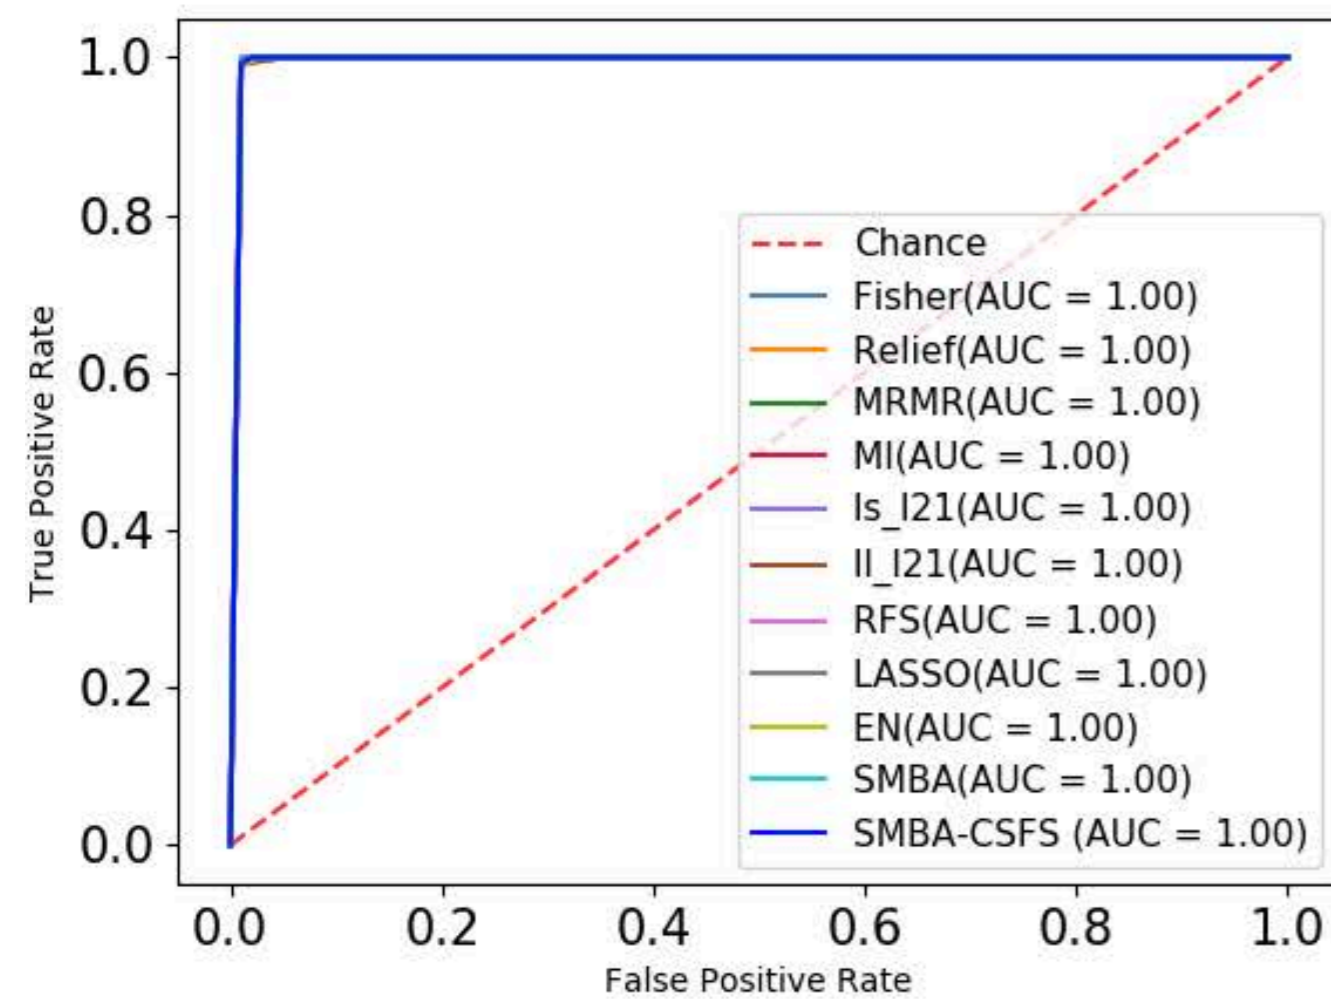

(g) DLBCL (9)

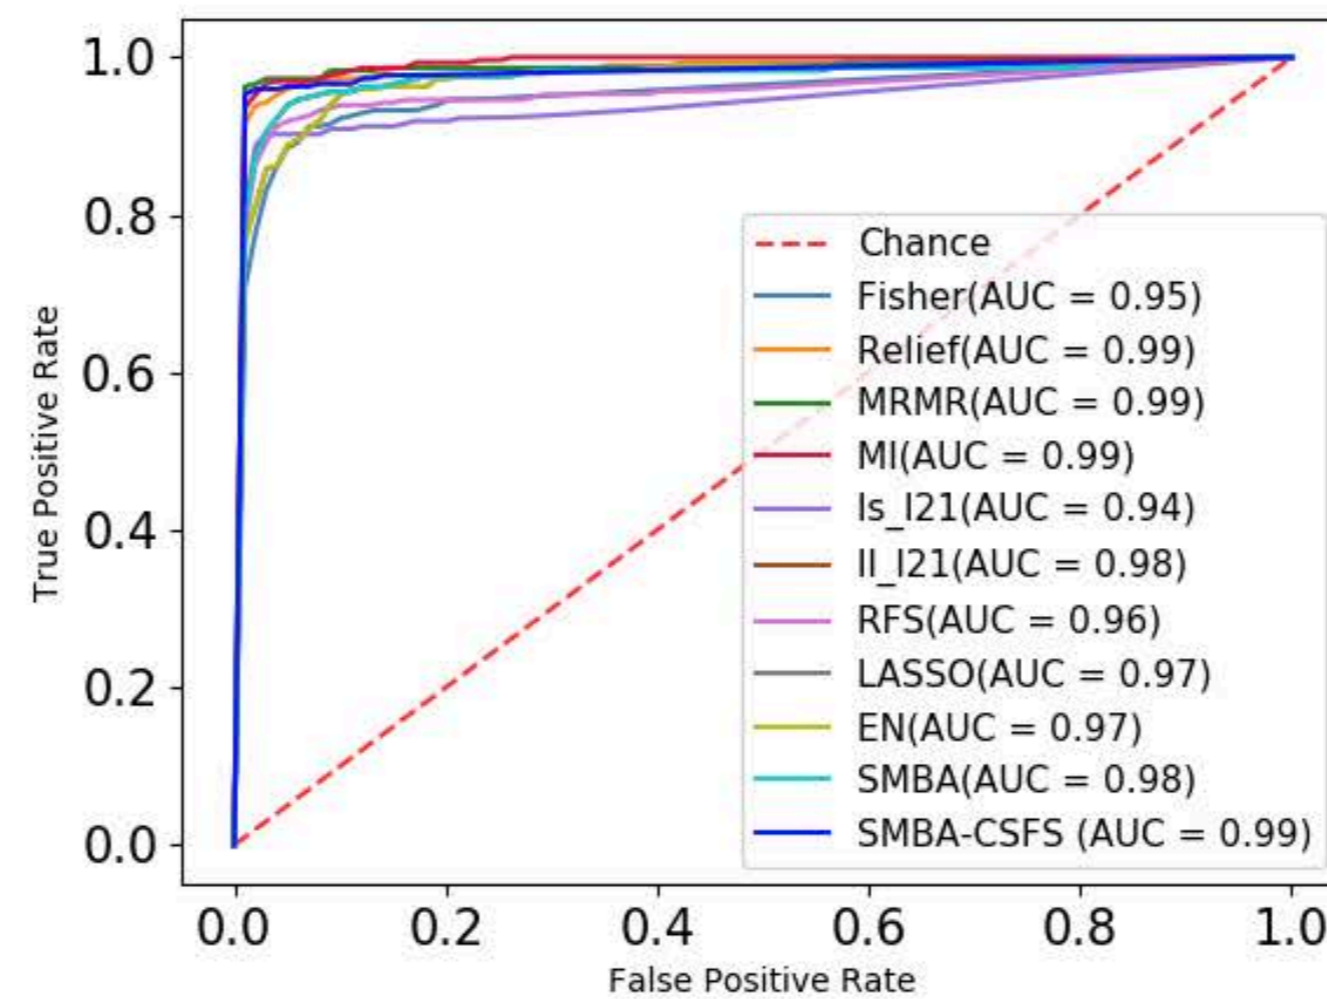

(h) CARCINOM (11)

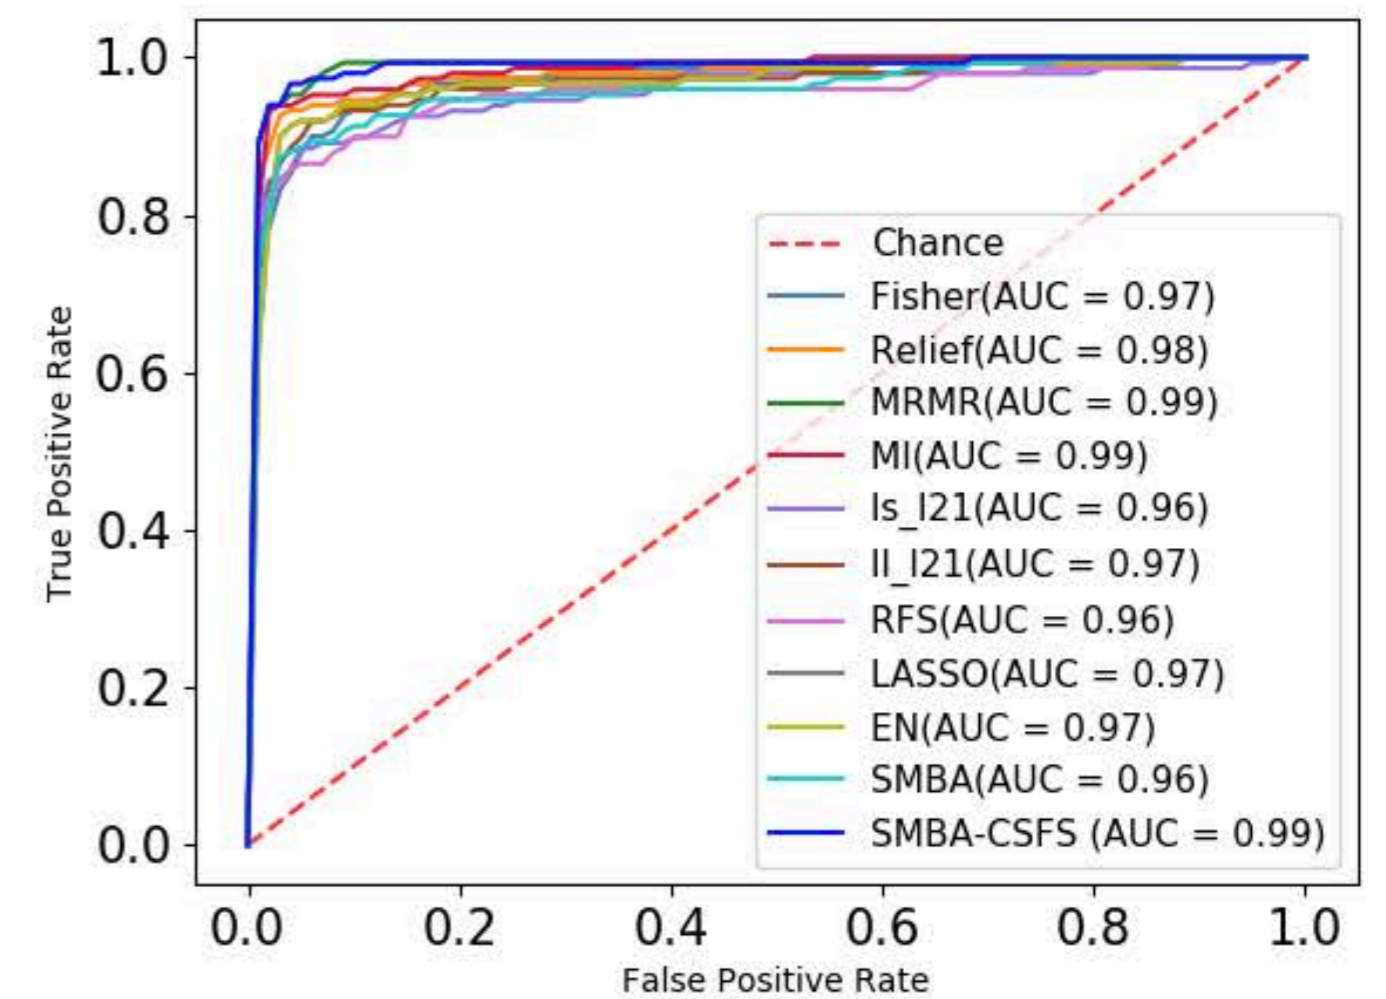

(i) GCM (14)

**Figure 4.** Averaged ROC curves comparing the performance among SMBA-CSFS and TFS methods for the classification of nine data sets on the first 80 features. Naive Bayes classifier with 5-fold CV was used.

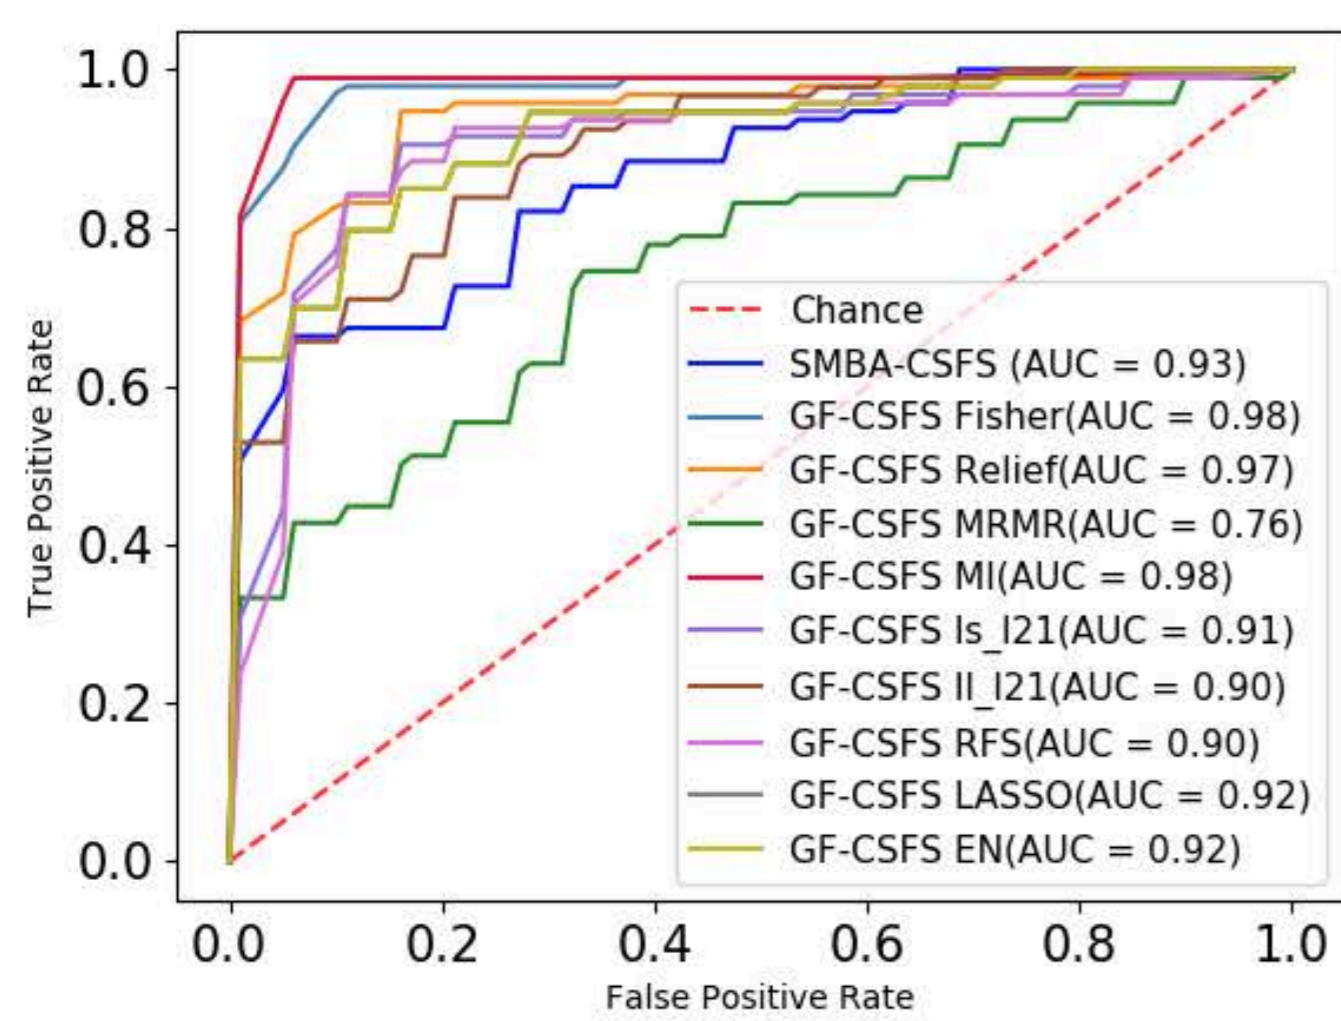

(a) ALLAML (2)

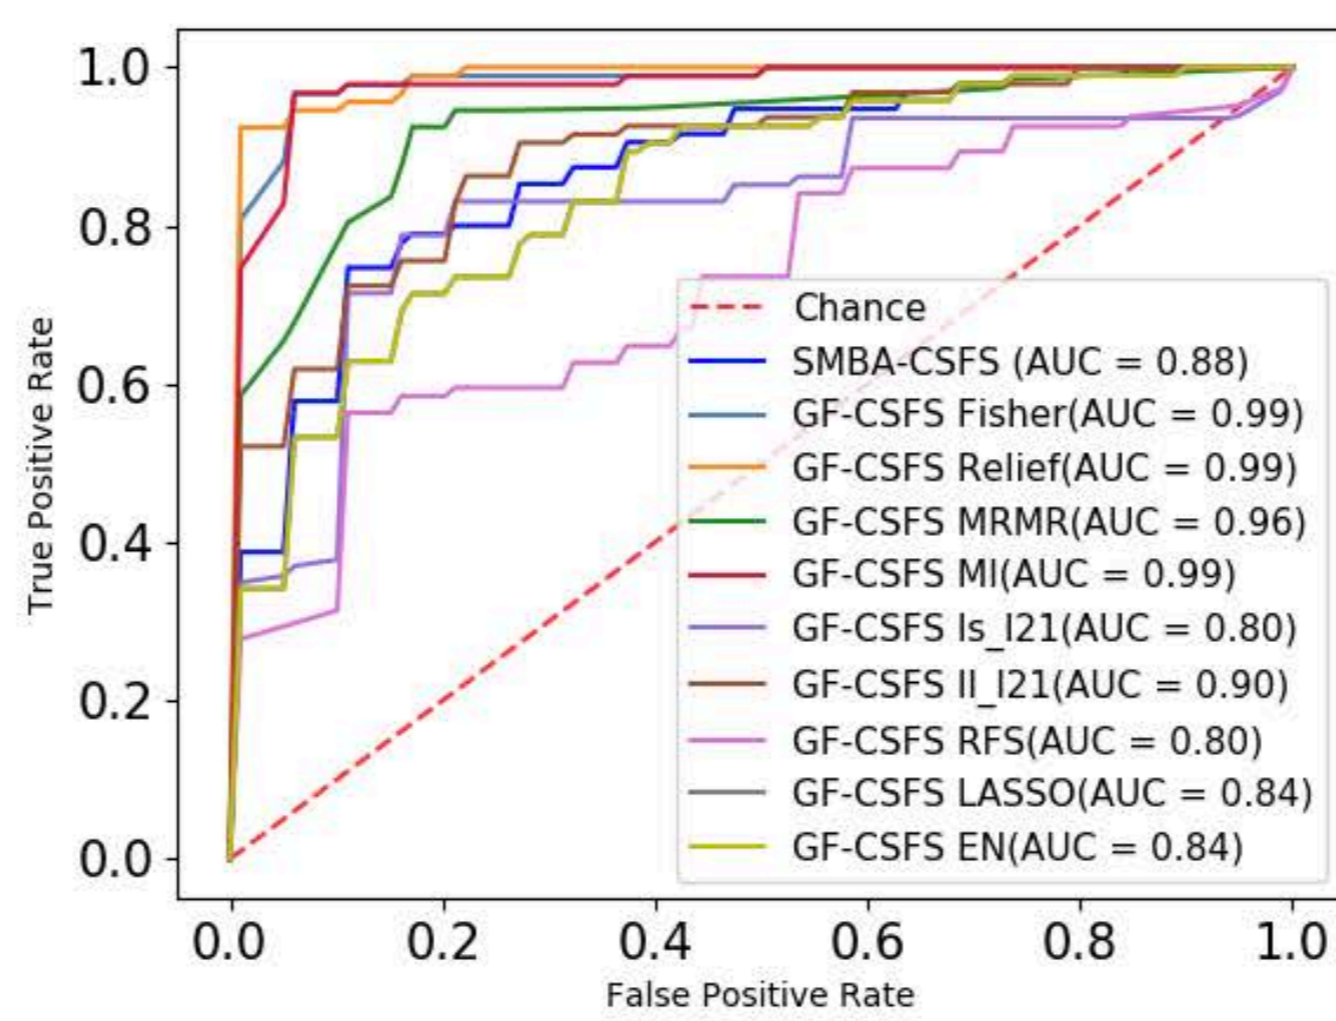

(b) LEUKEMIA (2)

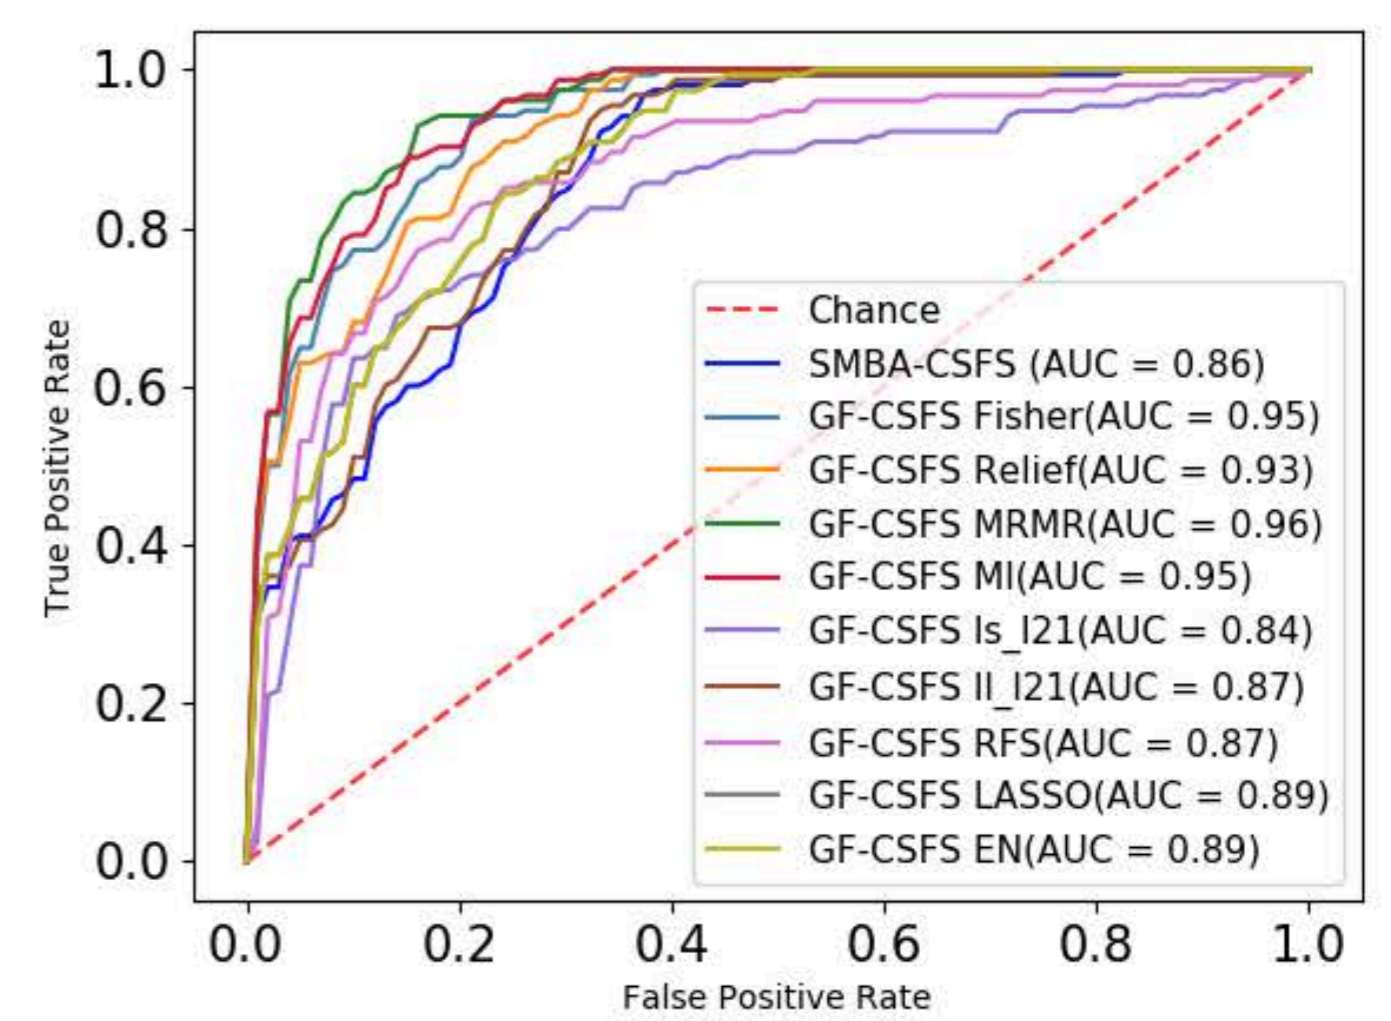

(c) CLL\_SUB\_111 (3)

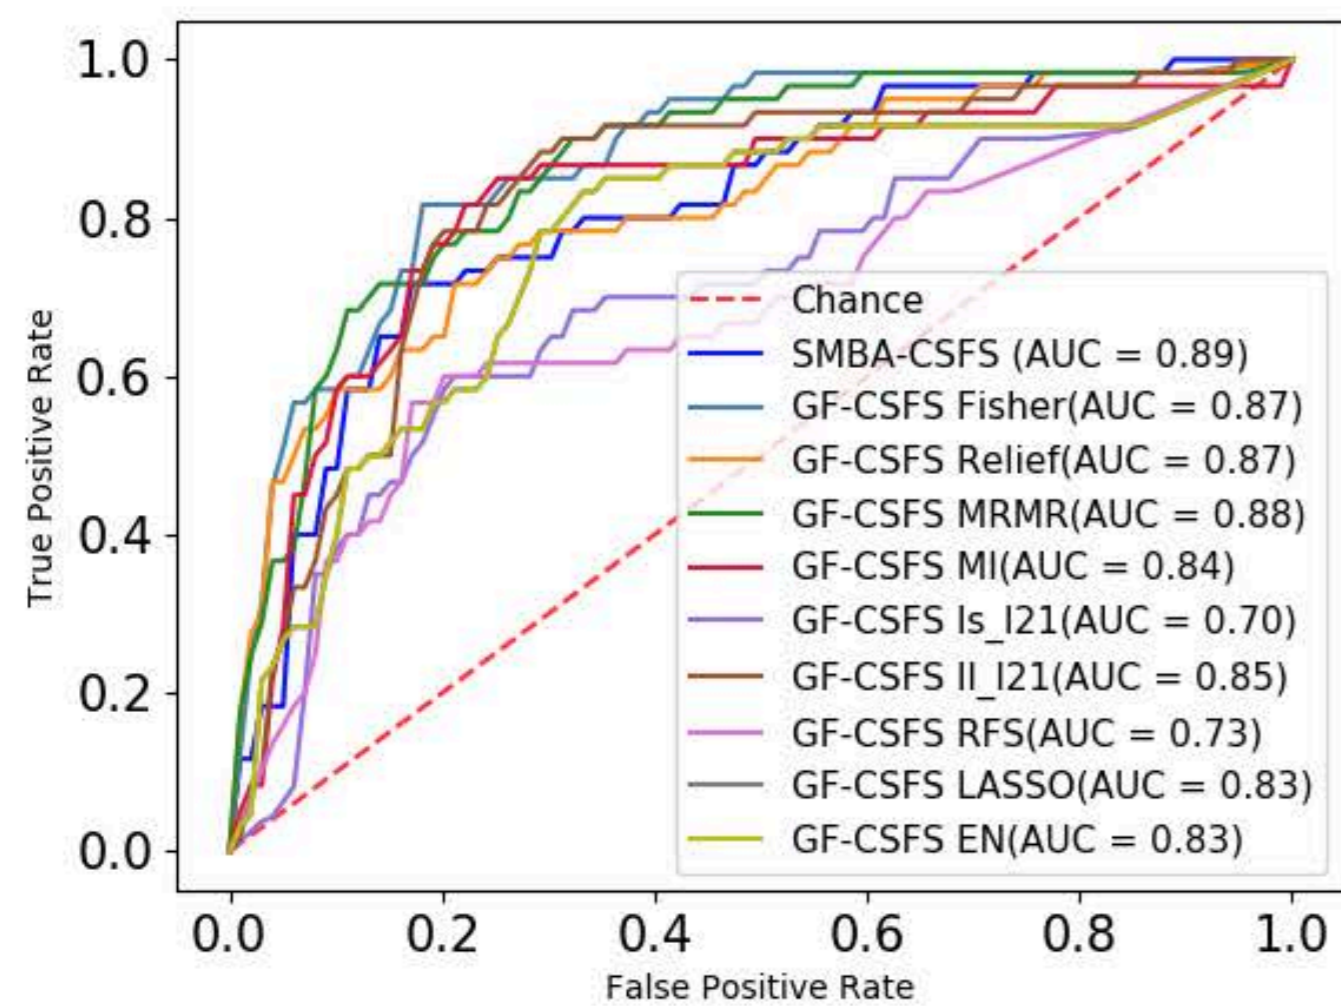

(d) GLIOMA (4)

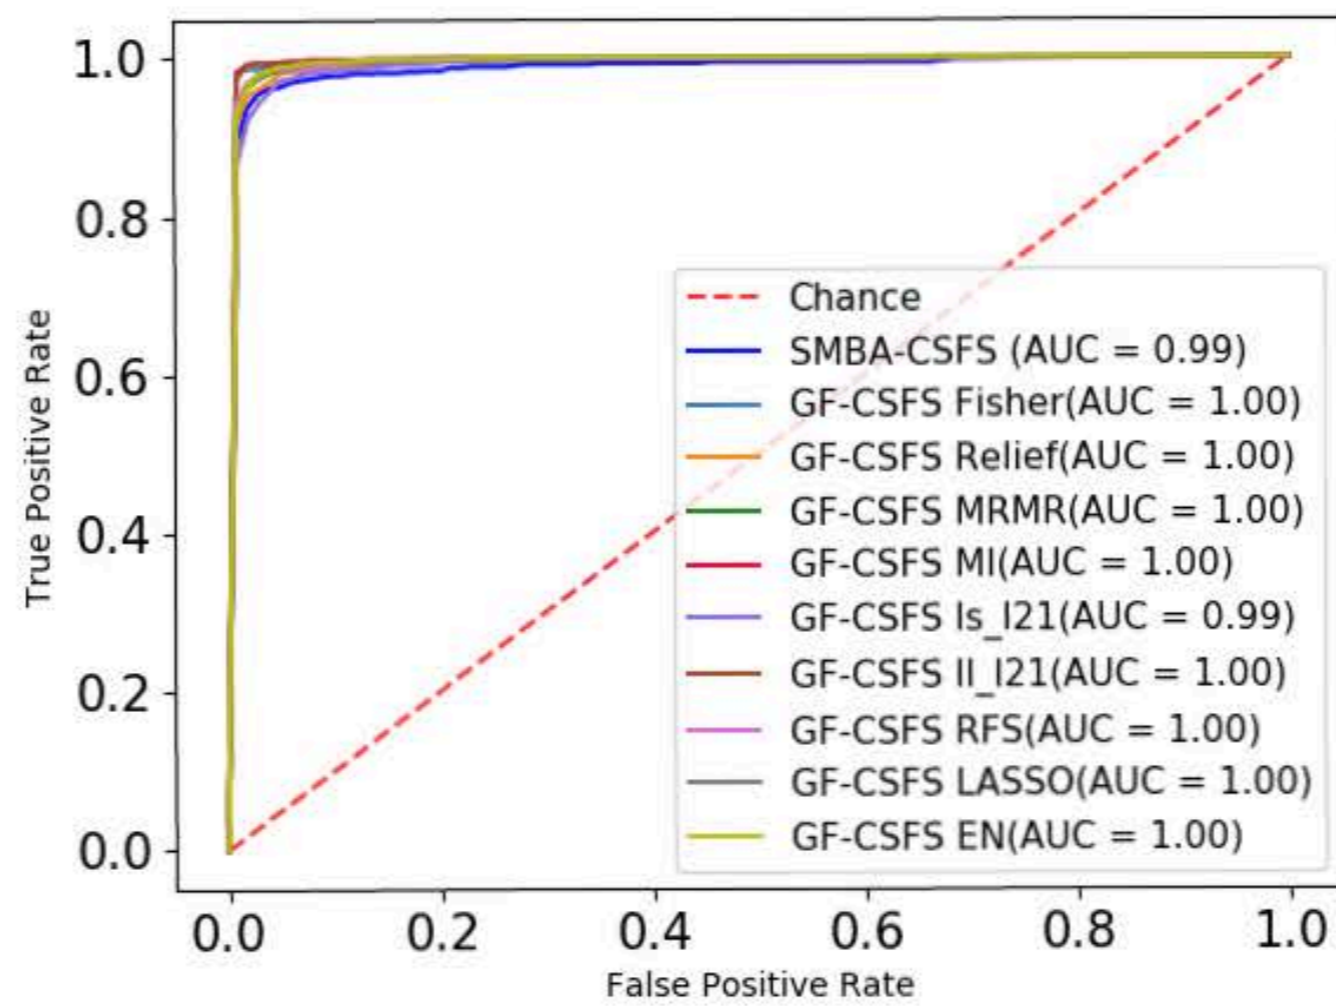

(e) LUNG\_C (5)

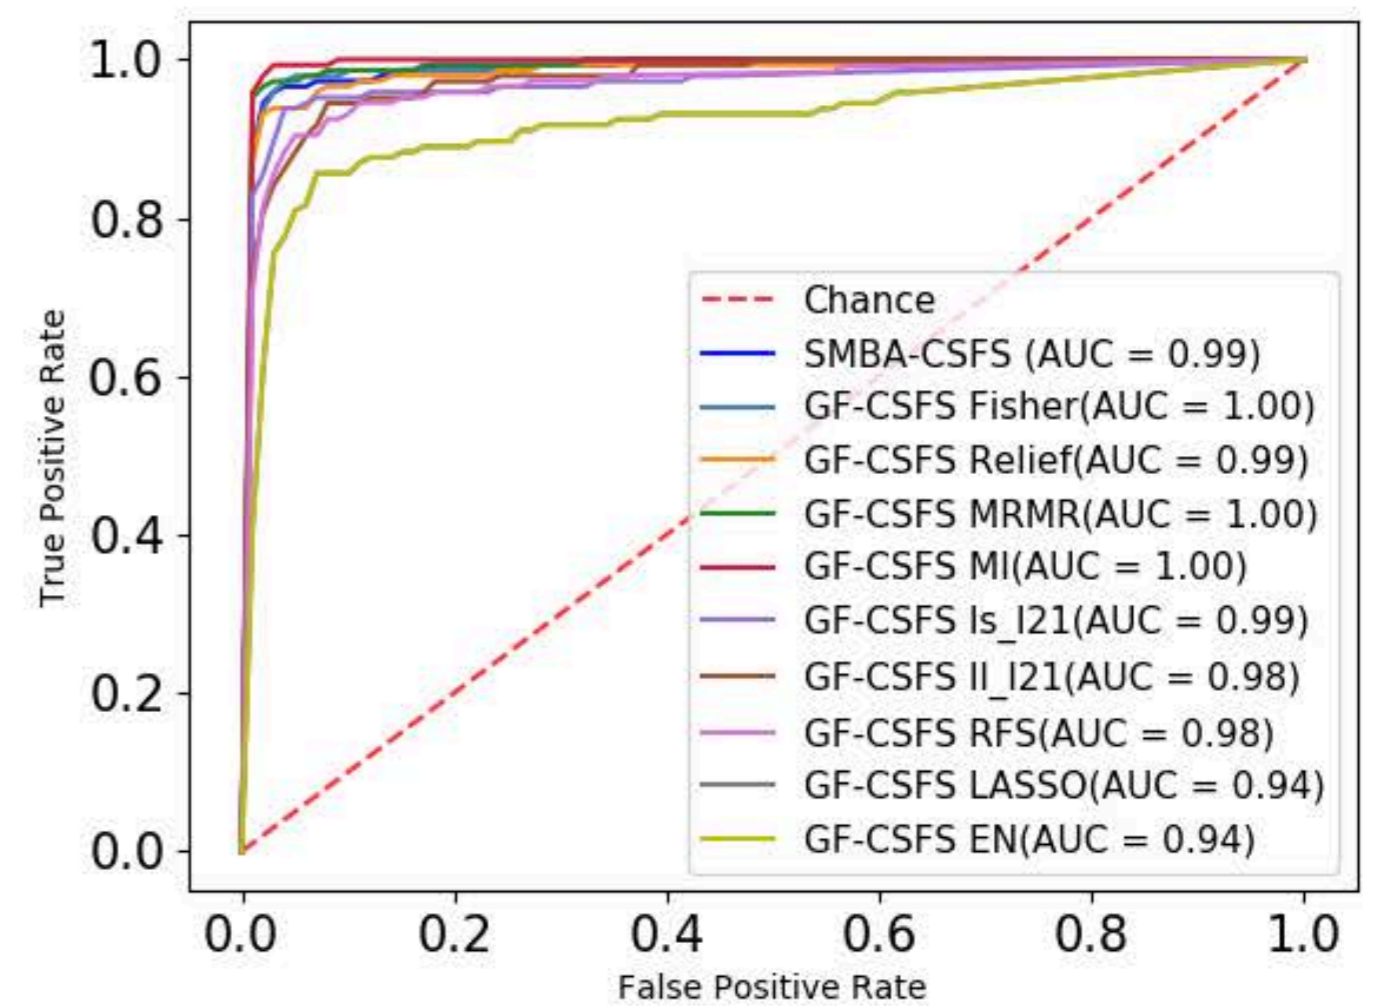

(f) LUNG\_D (7)

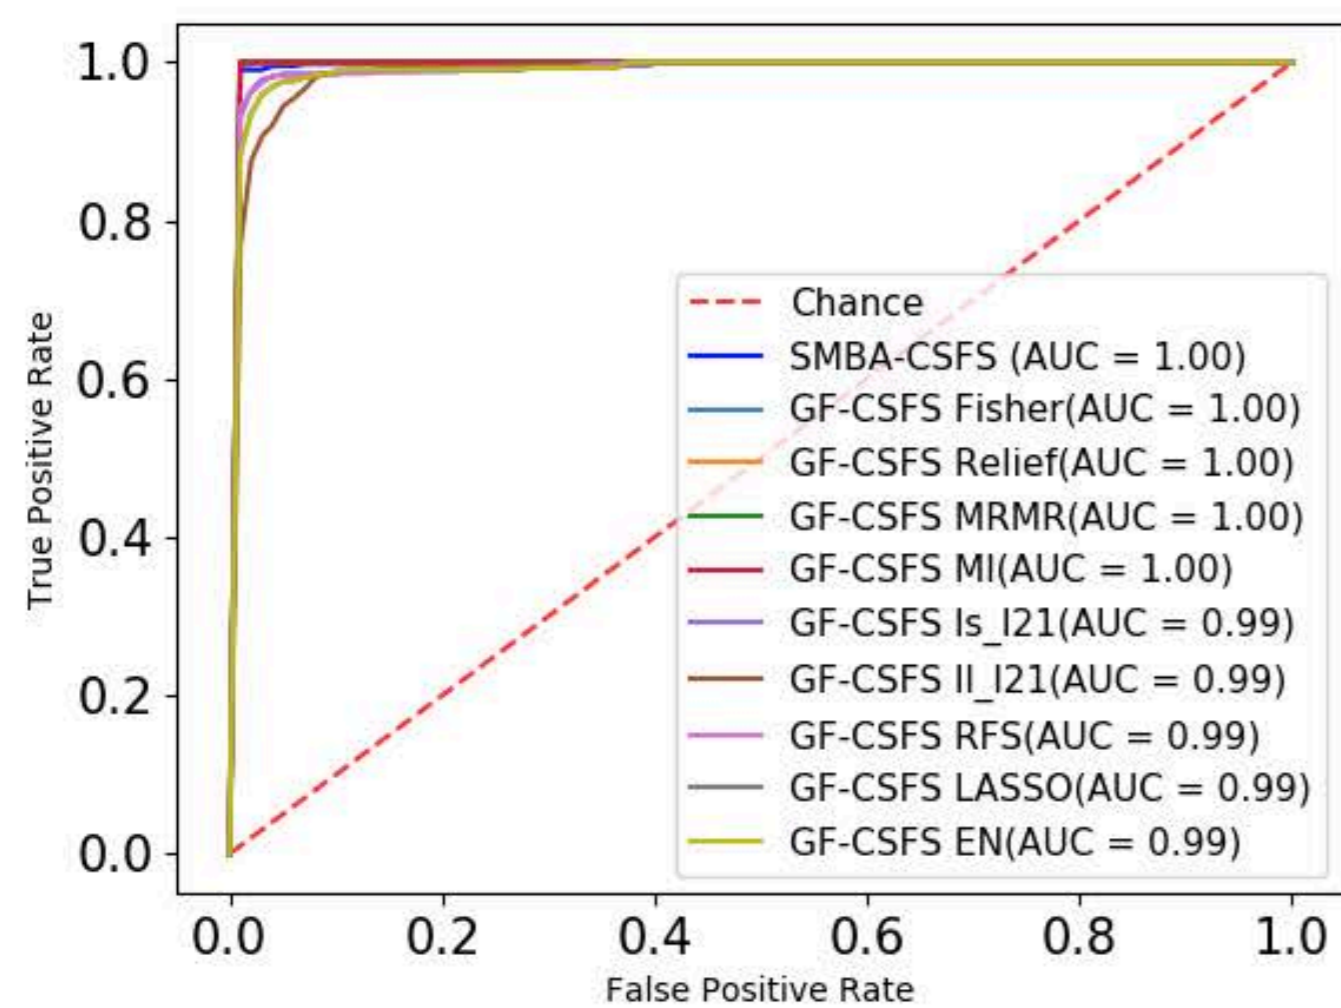

(g) DLBCL (9)

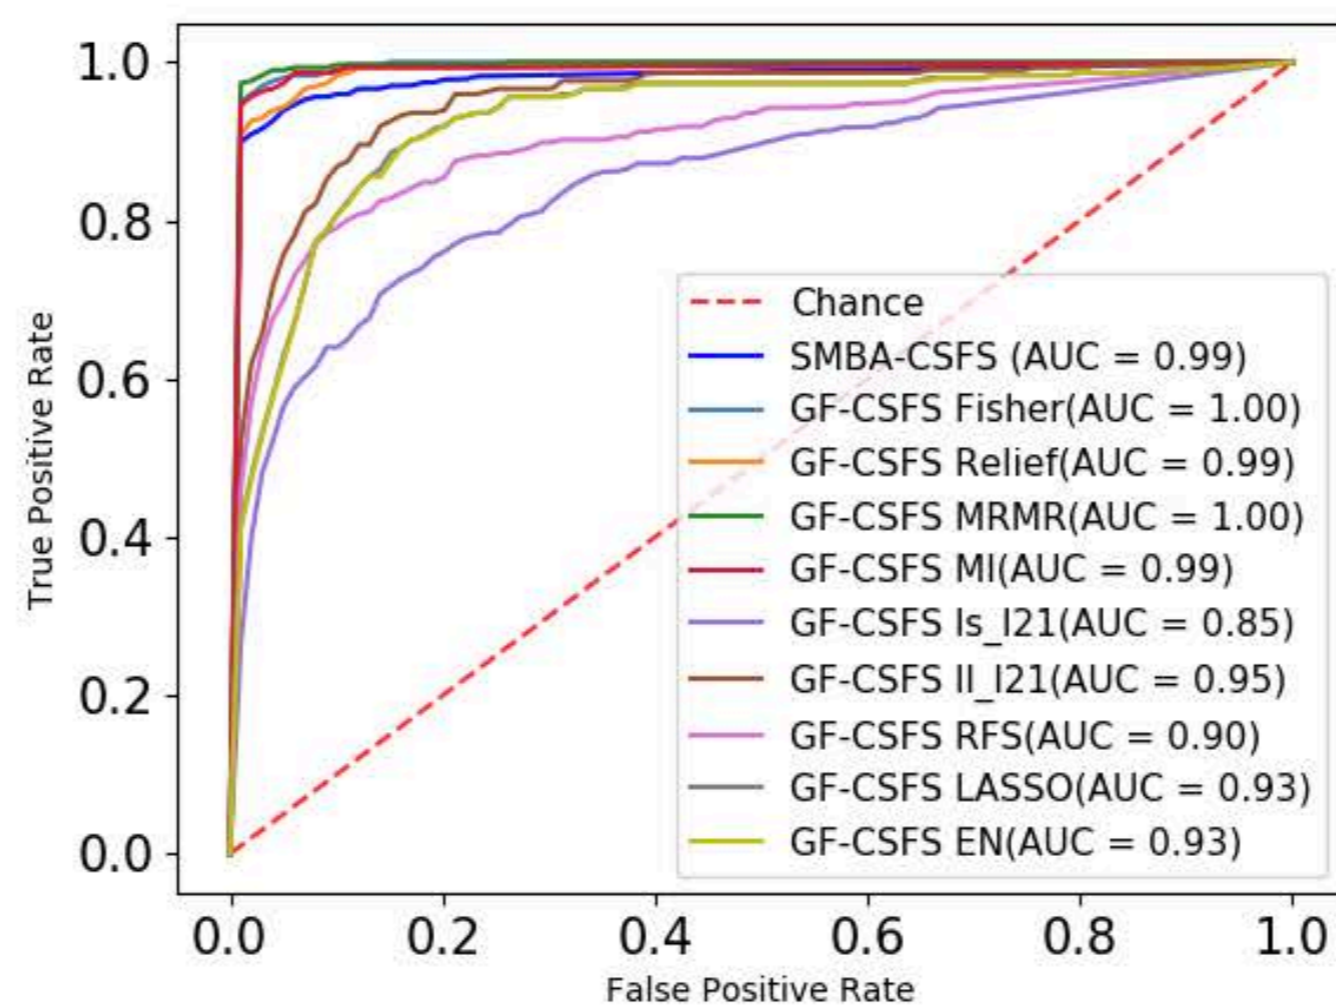

(h) CARCINOM (11)

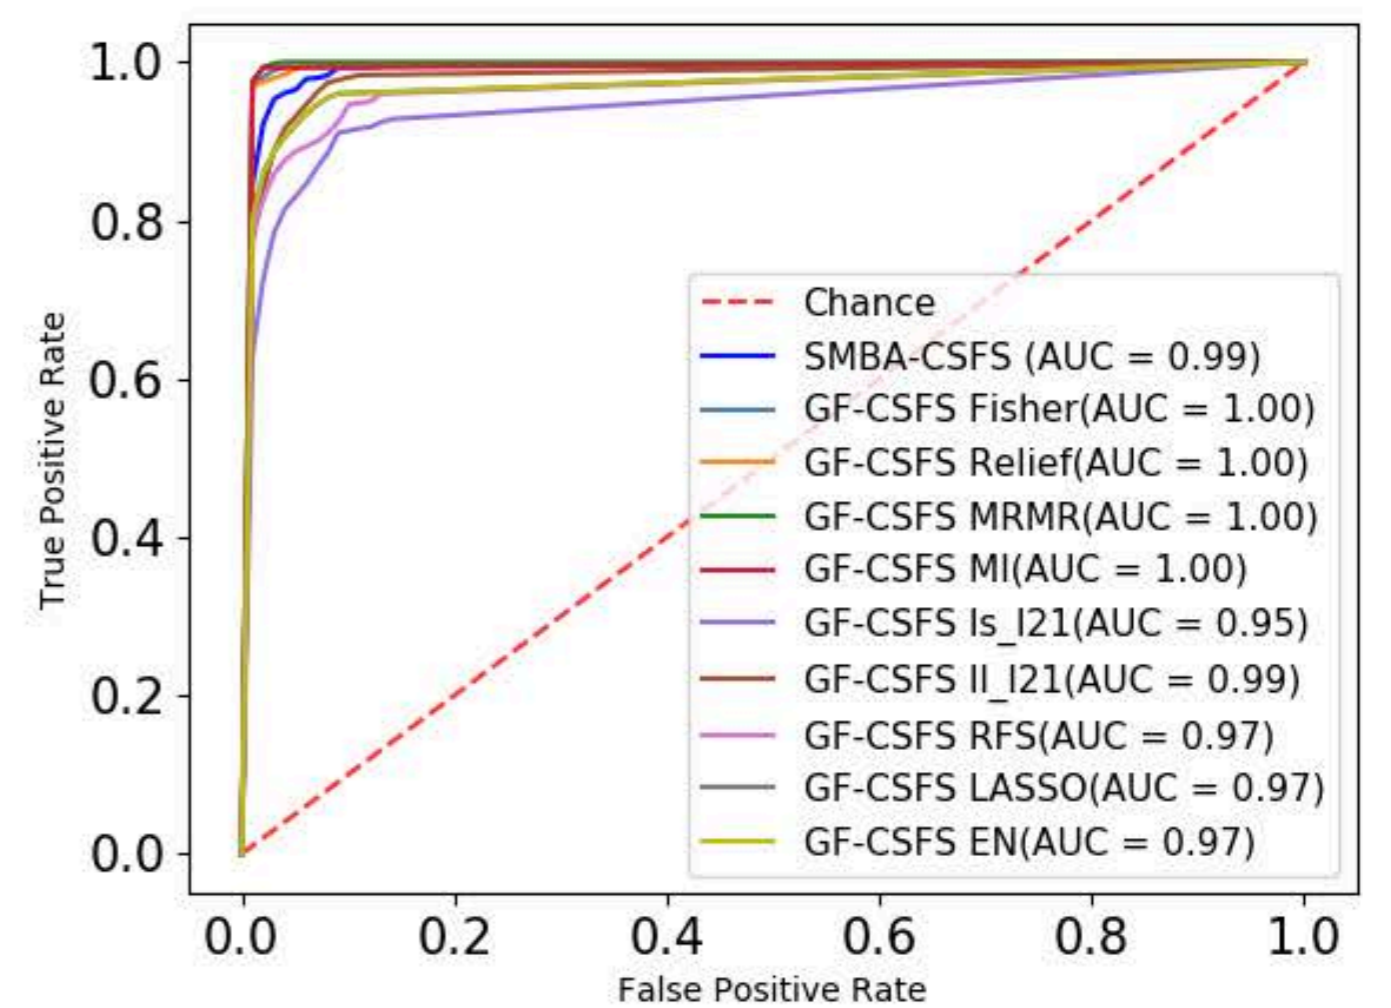

(i) GCM (14)

**Figure 5.** Averaged ROC curves comparing the performance among SMBA-CSFS and several CSFS methods for the classification of nine data sets on the first 20 features. Naive Bayes classifier with 5-fold CV was used.

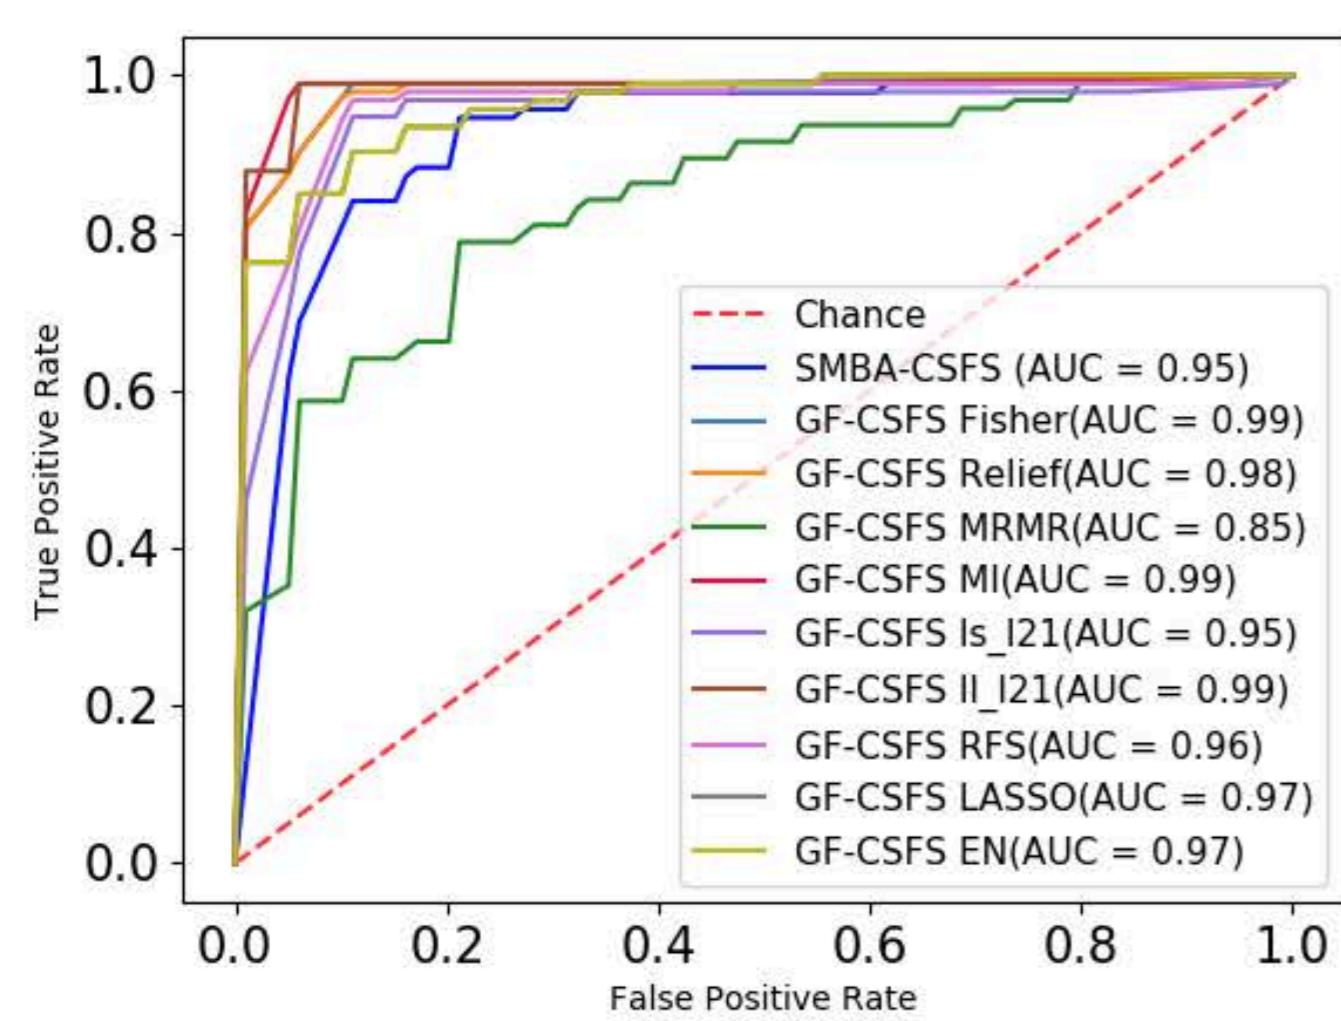

(a) ALLAML (2)

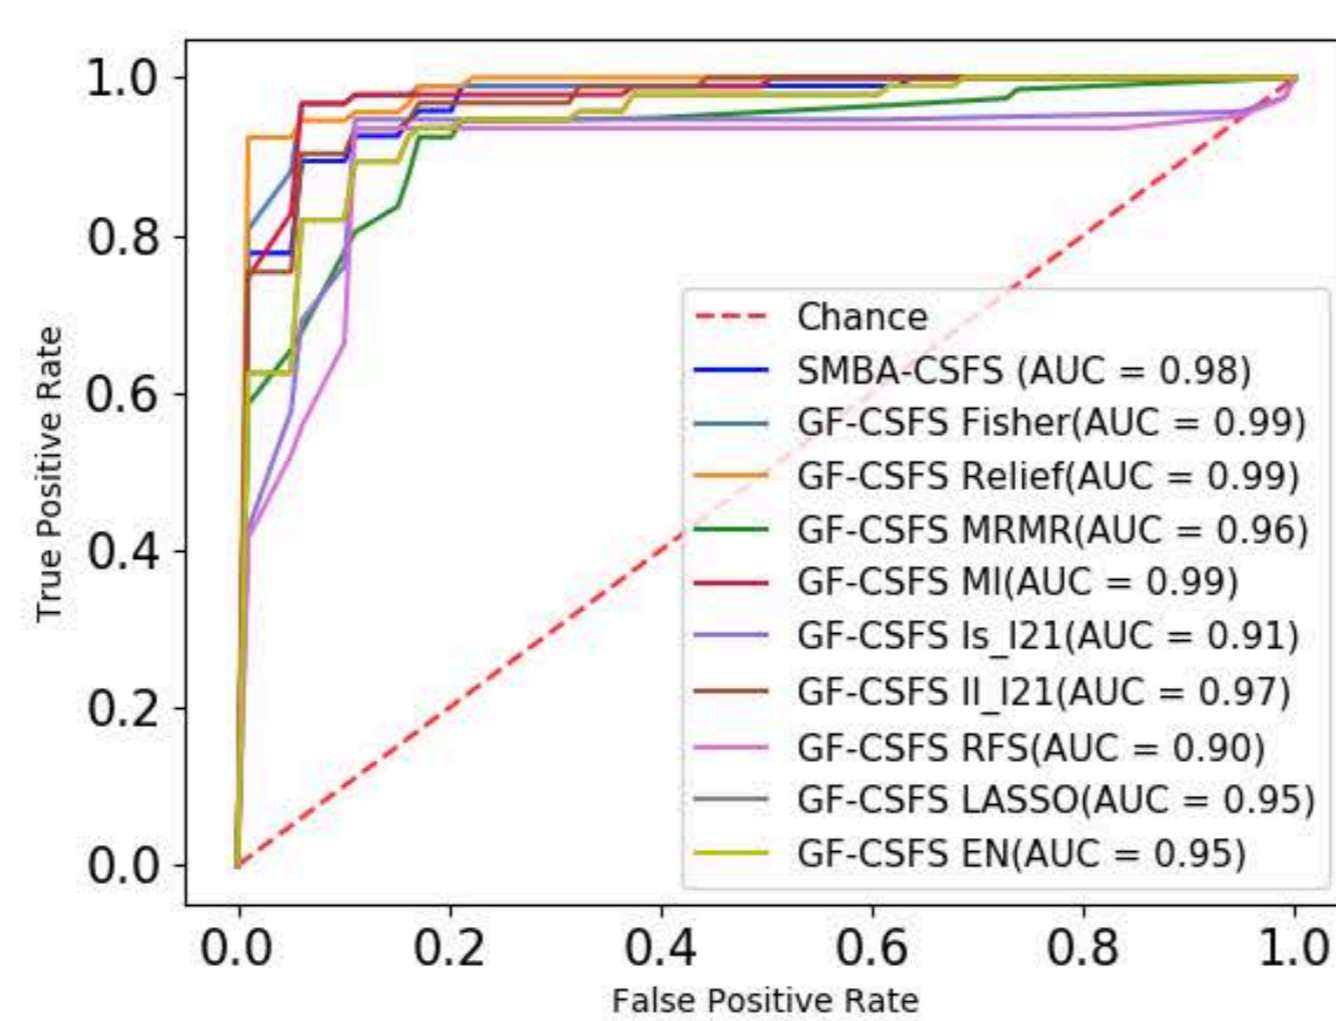

(b) LEUKEMIA (2)

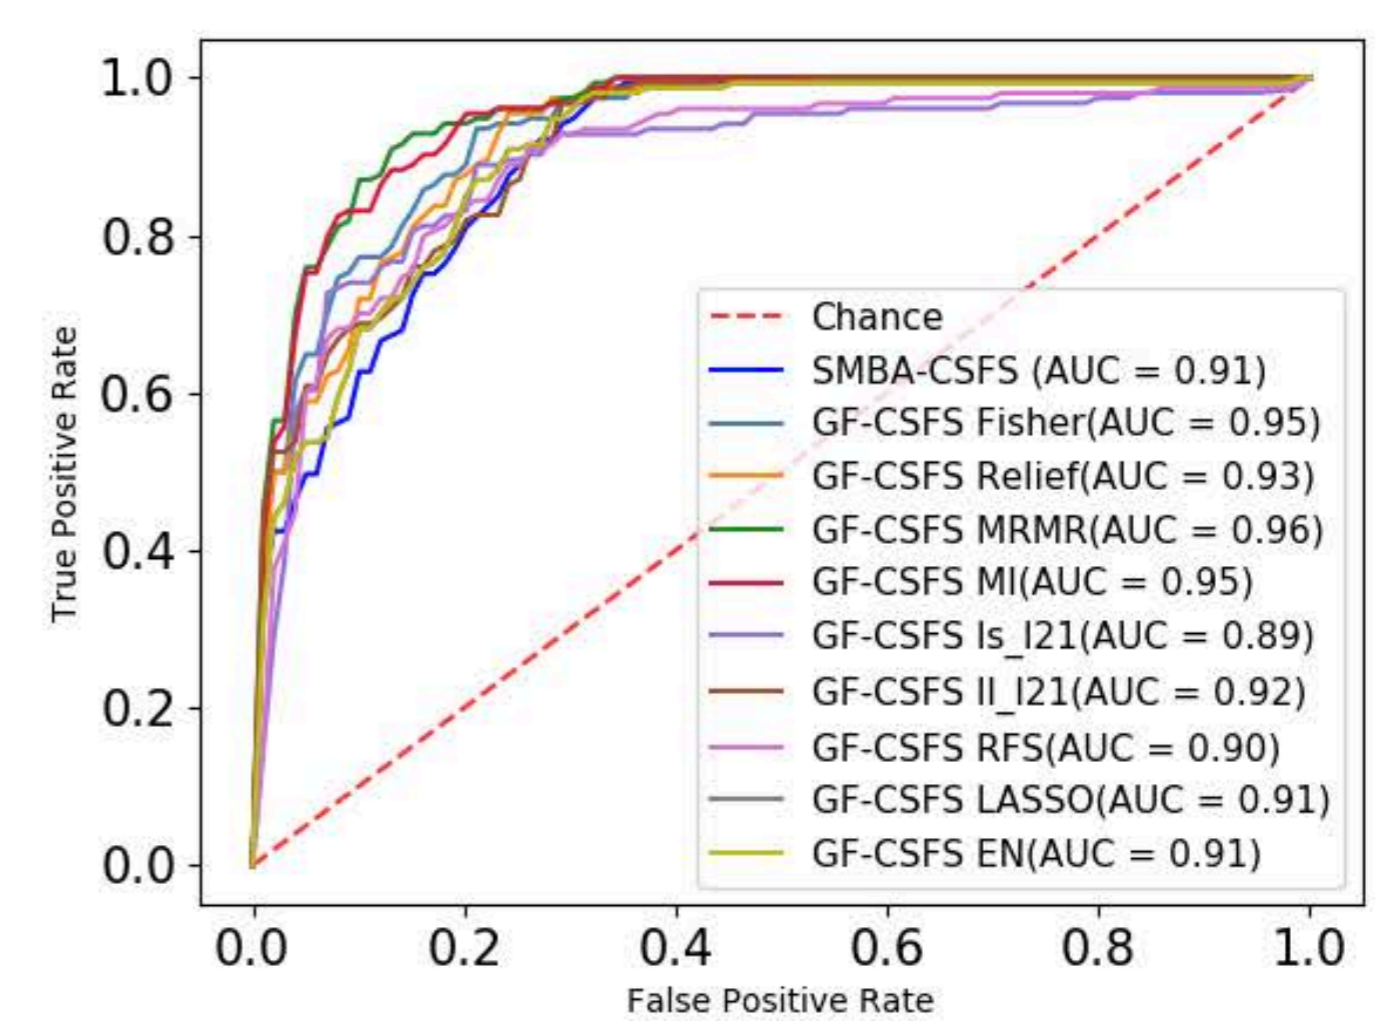

(c) CLL\_SUB\_111 (3)

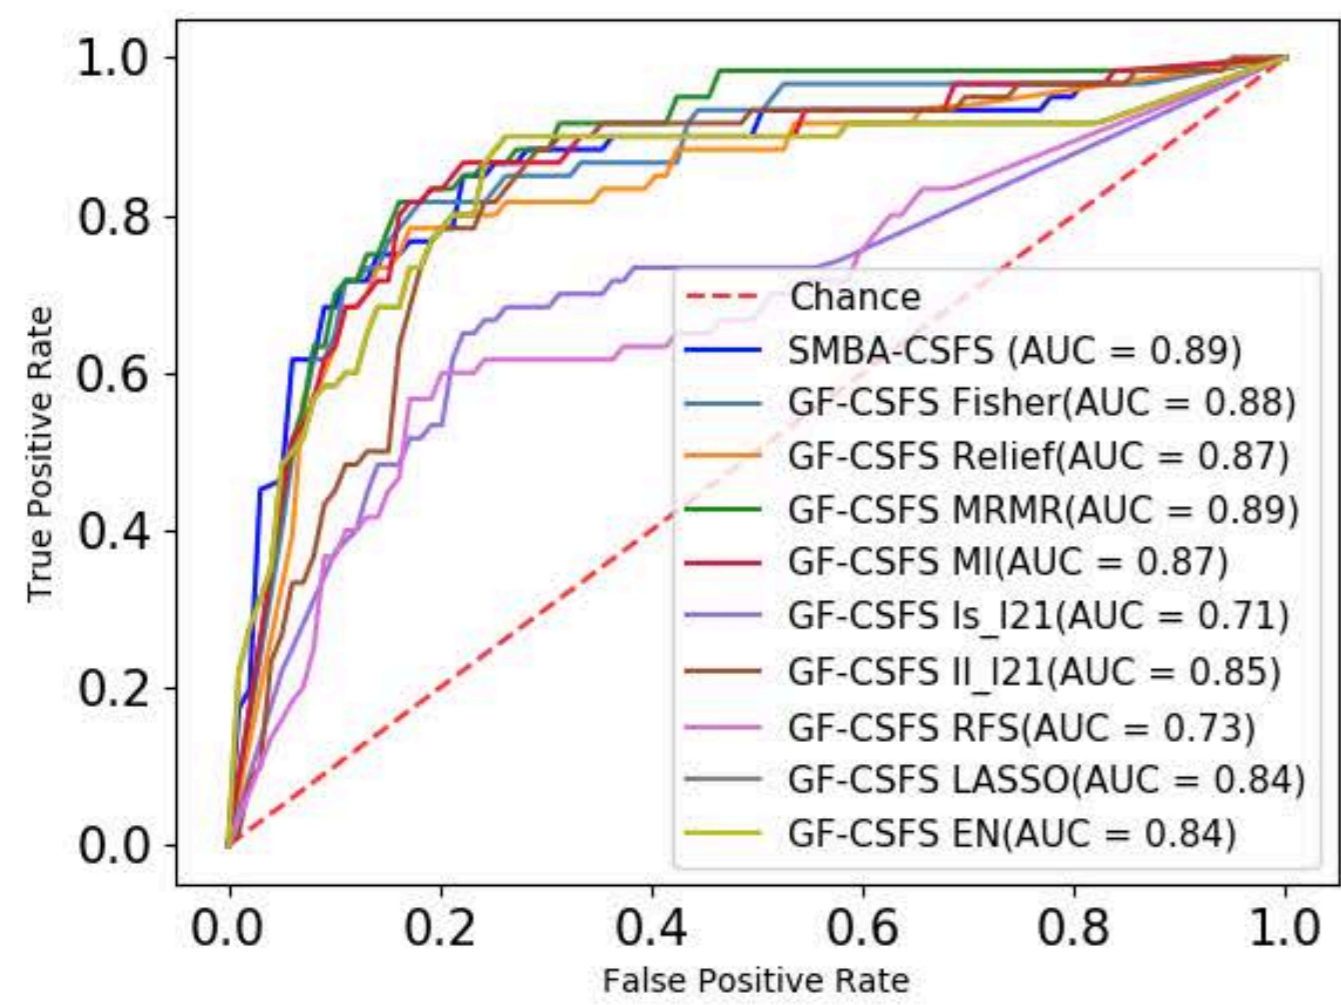

(d) GLIOMA (4)

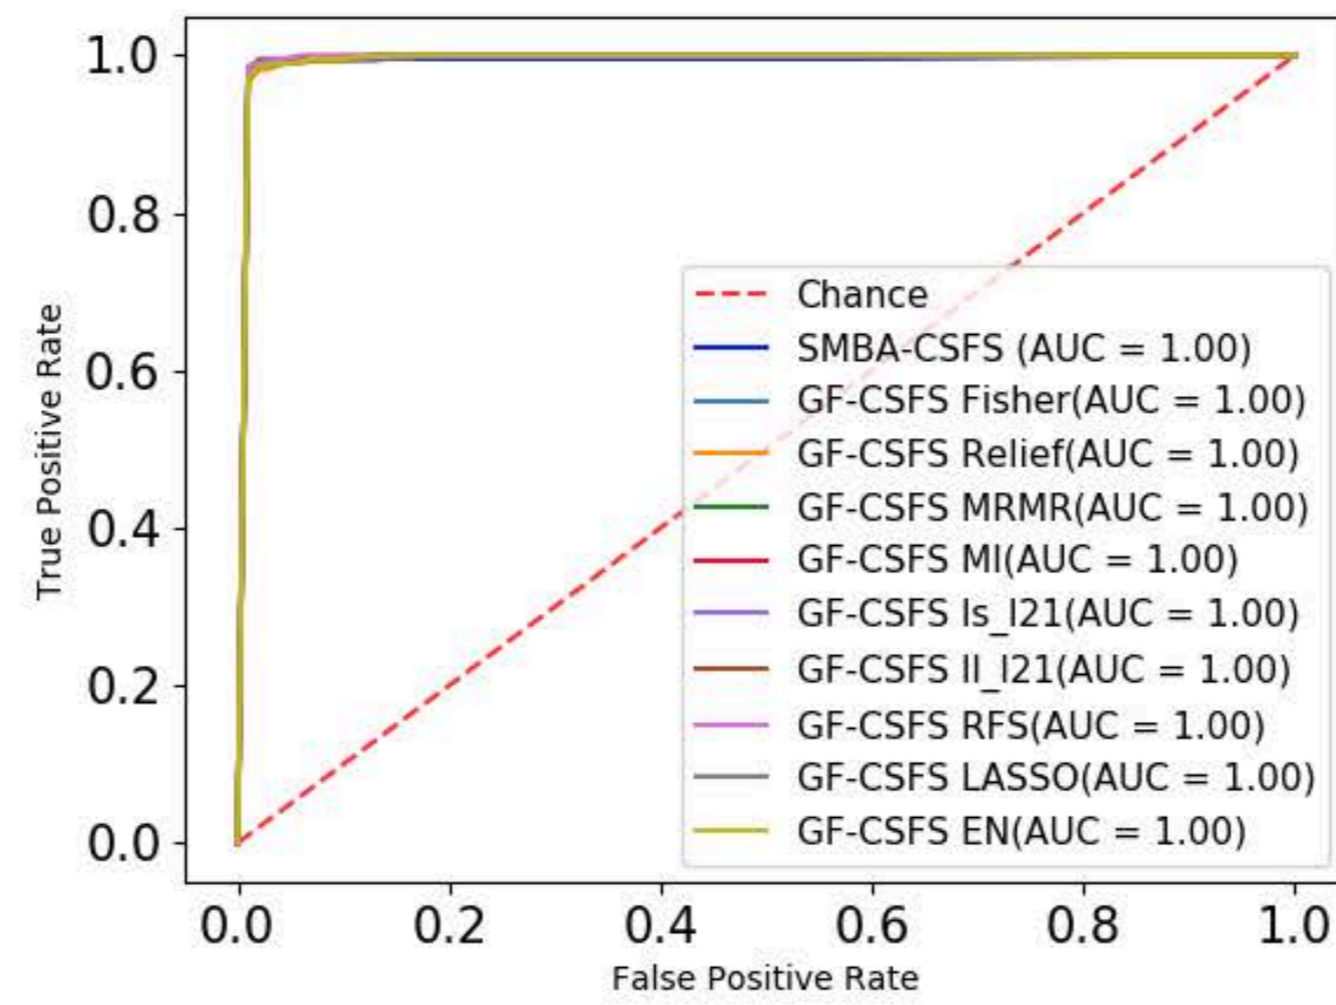

(e) LUNG\_C (5)

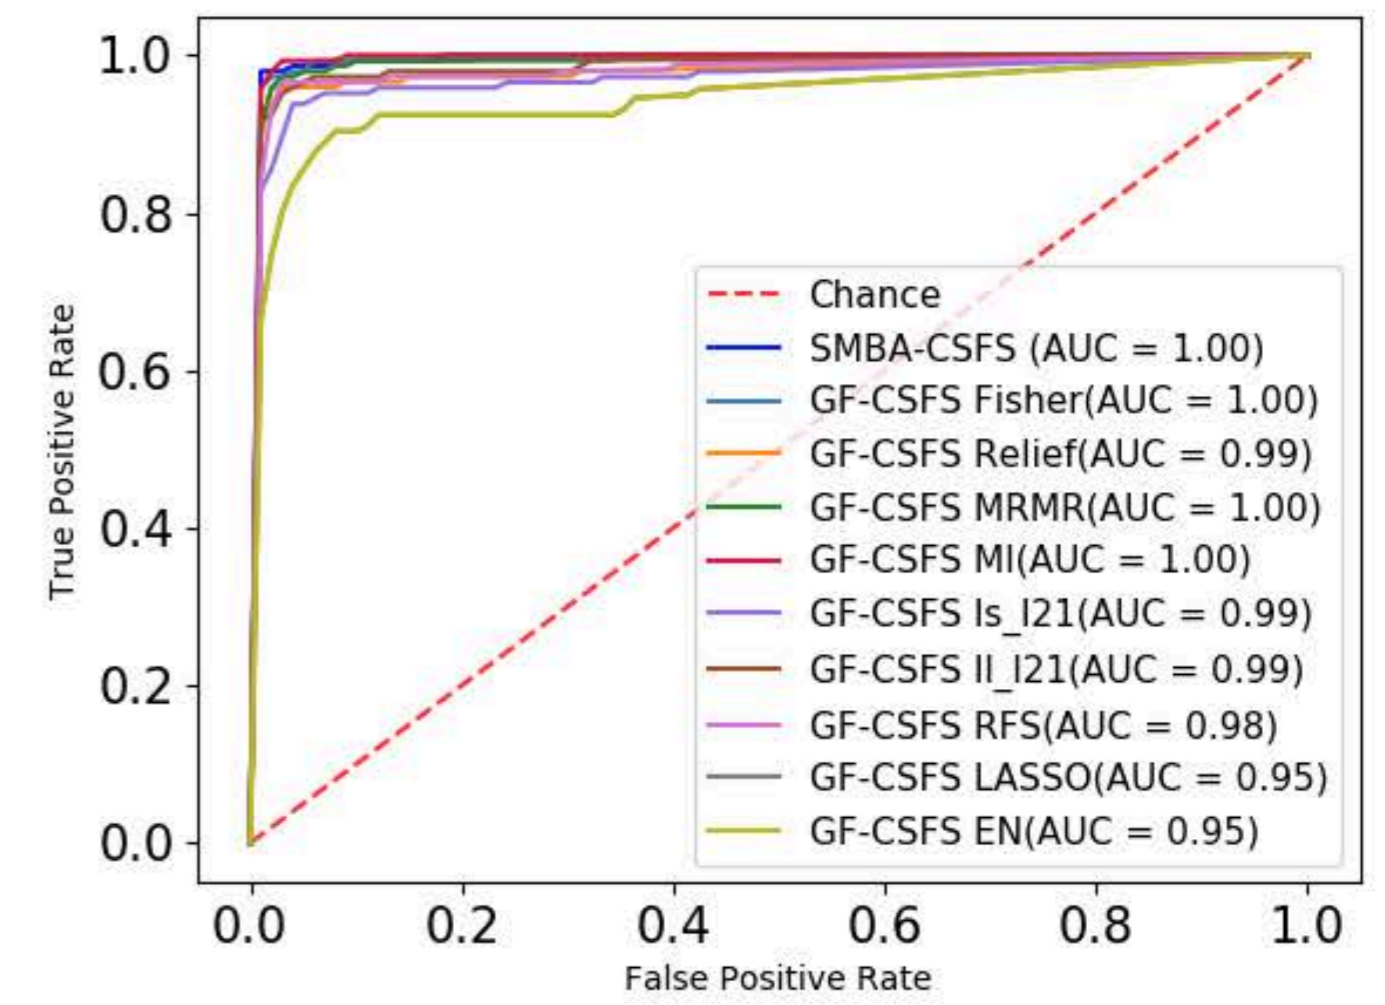

(f) LUNG\_D (7)

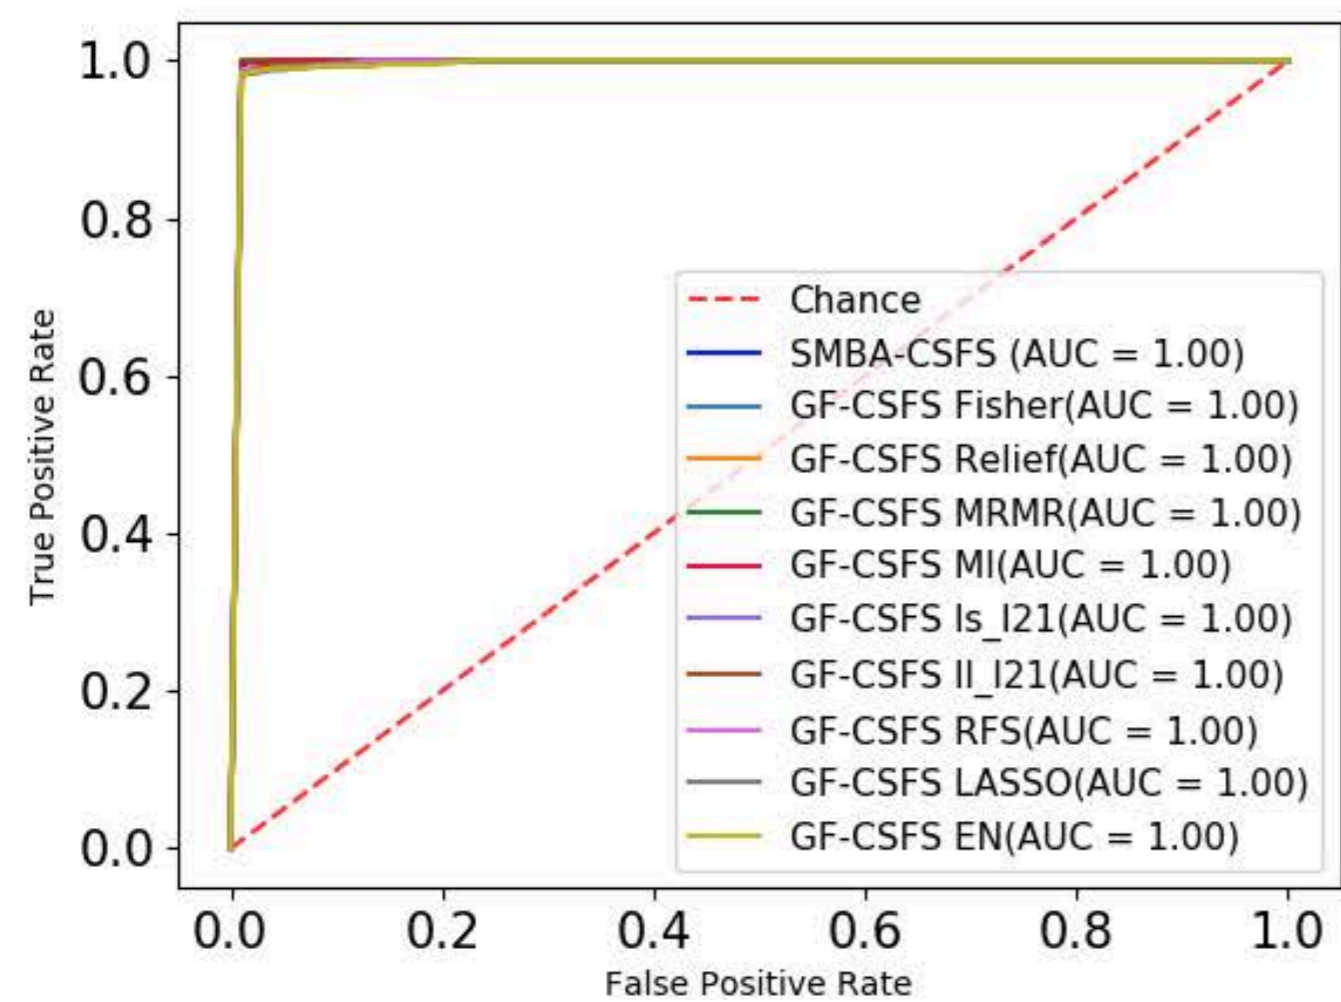

(g) DLBCL (9)

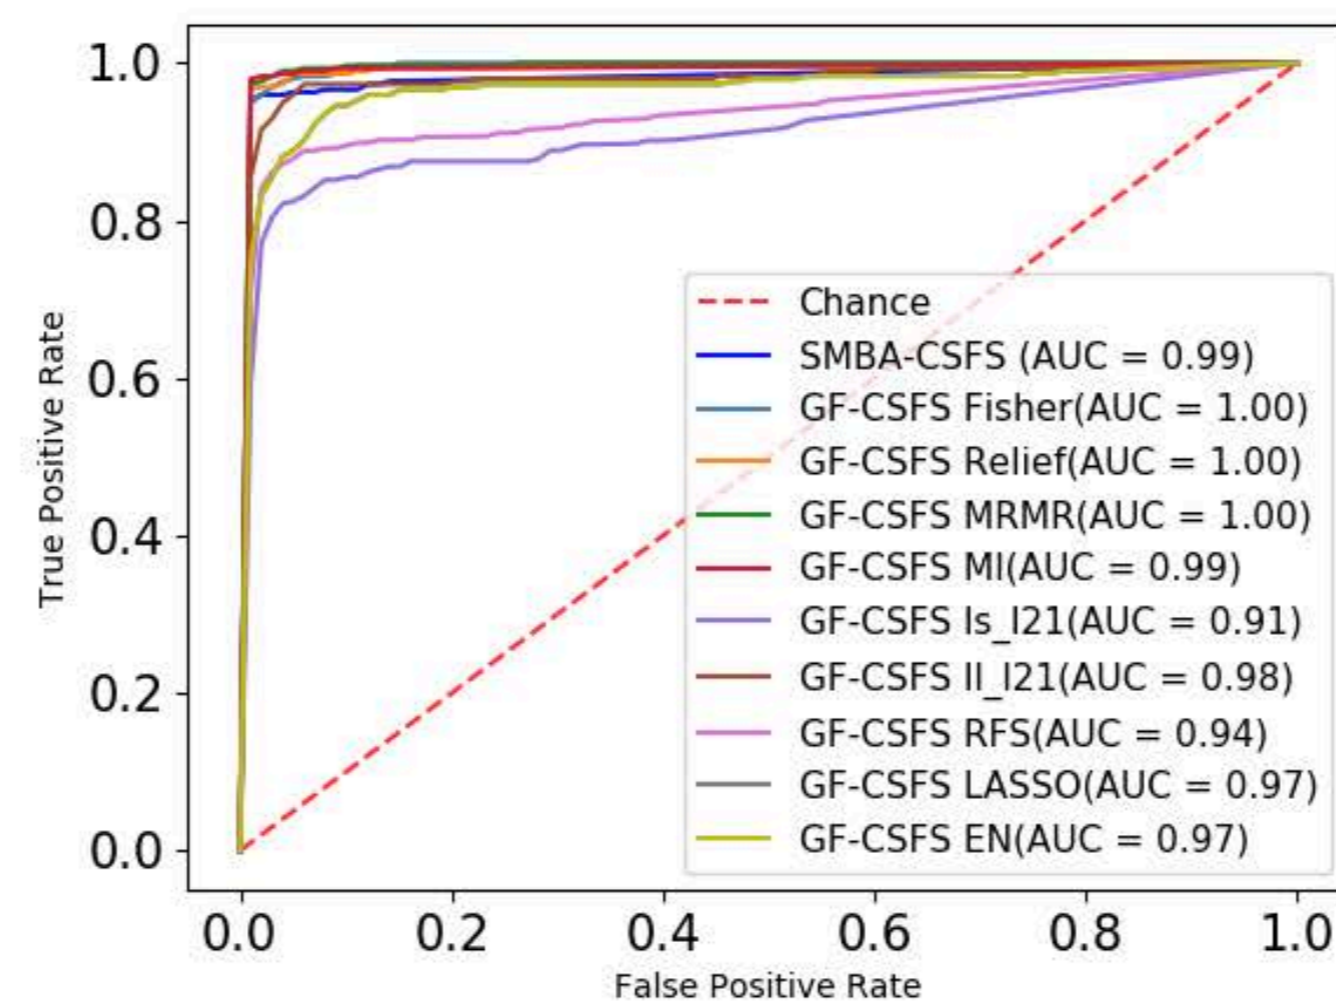

(h) CARCINOM (11)

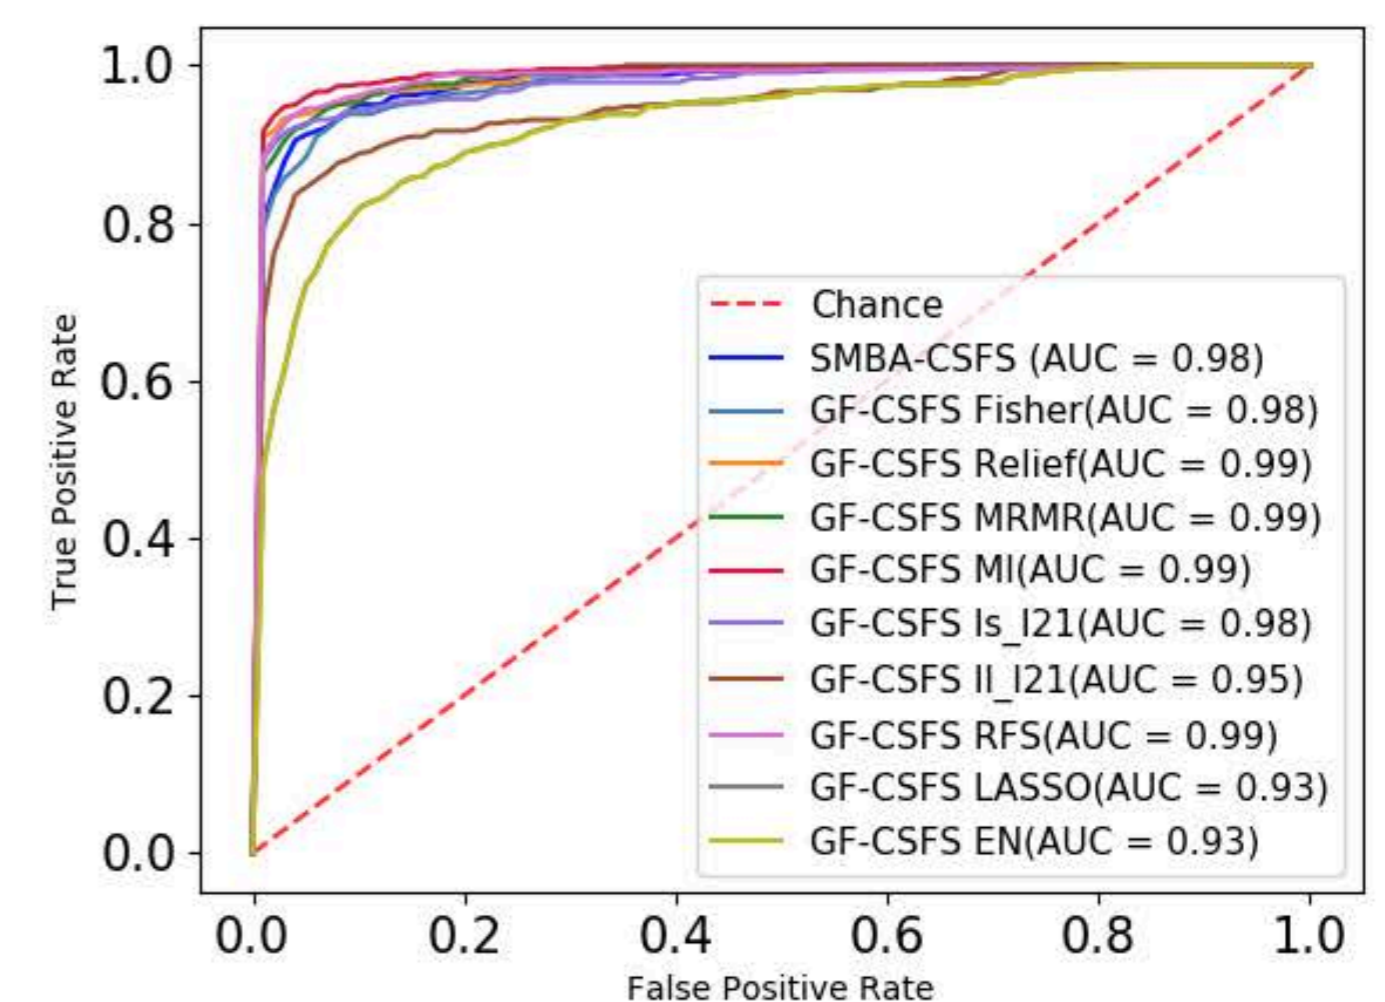

(i) GCM (14)

**Figure 6.** Averaged ROC curves comparing the performance among SMBA-CSFS and several CSFS methods for the classification of nine data sets on the first 80 features. Naive Bayes classifier with 5-fold CV was used.
