# Supplementary material for: A Sparse-Modeling Based Approach for Class Specific Feature Selection
Source: PeerJ Comput Sci. 2019 Nov 18;5:e237. doi: 10.7717/peerj-cs.237 (PMC7924712; doi:10.7717/peerj-cs.237)
Supplement: Supplemental Information 9 — The model evaluation metrics were computed taking into account the top 20 and 80 selected features with a 5 k-fold CV. [file peerj-cs-05-237-s009.xlsx]

## Sheet: No. 20 features
AVERAGE ACCURACY (SMBA-CSFS vs TFS)												AVERAGE ACCURACY (SMBA-CSFS vs GF-CSFS)
	ALLAML(2)	LEUKEMIA(2)	CLL_SUB_111(3)	GLIOMA(4)	LUNG_C(5)	LUNG_D(7)	DLBCL(9)	CAR(11)	GCM(14)				ALLAML(2)	LEUKEMIA(2)	CLL_SUB_111(3)	GLIOMA(4)	LUNG_C(5)	LUNG_D(7)	DLBCL(9)	CAR(11)	GCM(14)
Fisher	94,74±0,07(4)	97,89±0,03(8)	75,85±0,03(17)	85,0±0,06(16)	88,78±0,01(20)	89,06±0,05(19)	96,38±0,01(19)	62,28±0,07(20)	94.29+/-0.00(20)			Fisher	95,9±0,03(8)	97,33±0,03(10)	78,46±0,07(8)	70,0±0,13(17)	93,61±0,07(16)	85,05±0,1(17)	98,07±0,01(17)	93,13±0,04(16)	98.57+/-0.0(20)
Relief	97,89±0,03(18)	97,89±0,03(13)	71,83±0,07(18)	80,0±0,08(20)	95,4±0,01(20)	90,41±0,04(20)	94,93±0,02(17)	86,54±0,02(20)	93.91+/-0.01(20)			Relief	95,81±0,03(20)	94,57±0,05(5)	80,32±0,1(17)	68,0±0,07(16)	94,11±0,06(13)	85,14±0,11(18)	99,04±0,01(20)	91,43±0,07(20)	98.54+/-0.0(20)
MRMR	81,64±0,17(20)	97,89±0,03(5)	64,09±0,08(20)	71,67±0,12(13)	93,24±0,02(20)	93,89±0,02(19)	98,31±0,01(14)	85,86±0,04(20)	96.56+/-0.00(19)			MRMR	64,0±0,09(2)	97,24±0,03(8)	57,83±0,1(13)	62,0±0,1(17)	82,78±0,06(20)	82,38±0,07(16)	84,5±0,03(20)	83,3±0,04(20)	98.33+/-0.0(19)
MI	95,79±0,05(8)	97,89±0,03(8)	75,23±0,07(7)	78,33±0,1(11)	94,68±0,02(20)	84,46±0,08(17)	95,17±0,01(19)	92,59±0,02(20)	94.63+/-0.01(19)			MI	95,9±0,05(11)	97,33±0,03(17)	72,09±0,03(18)	80,0±0,11(15)	92,62±0,08(14)	81,14±0,14(20)	98,8±0,01(17)	91,97±0,07(19)	98.03+/-0.0(20)
ls_l21	80,64±0,12(9)	83,92±0,08(20)	66,0±0,08(20)	68,33±0,1(11)	89,93±0,04(19)	85,66±0,09(20)	88,88±0,06(19)	79,79±0,03(20)	94.76+/-0.01(18)			ls_l21	76,29±0,08(1)	69,14±0,17(2)	58,5±0,08(12)	60,0±0,06(20)	80,33±0,03(20)	68,57±0,05(15)	92,53±0,07(18)	41,9±0,08(19)	95.68+/-0.0(18)
ll_l21	83,98±0,09(15)	83,16±0,11(15)	71,23±0,02(20)	75,0±0,09(15)	96,4±0,01(20)	87,68±0,07(13)	89,37±0,05(20)	80,79±0,04(20)	95.95+/-0.00(19)			ll_l21	83,33±0,09(15)	78,86±0,09(20)	60,47±0,13(20)	70,0±0,06(17)	90,13±0,05(20)	65,62±0,07(19)	88,18±0,03(20)	63,83±0,04(19)	95.34+/-0.0(18)
RFS	75,44±0,15(14)	83,92±0,08(20)	71,91±0,1(16)	66,67±0,07(17)	91,51±0,03(19)	84,32±0,04(20)	89,37±0,04(20)	83,5±0,07(20)	94.93+/-0.01(20)			RFS	73,52±0,06(1)	75,05±0,24(16)	54,9±0,06(5)	66,0±0,14(20)	84,22±0,05(18)	75,33±0,03(19)	91,32±0,05(18)	62,54±0,22(20)	95.51+/-0.01(20)
LASSO	89,18±0,09(13)	69,12±0,09(20)	71,83±0,06(18)	73,33±0,12(18)	92,09±0,02(20)	87,01±0,06(20)	92,28±0,02(18)	77,43±0,06(19)	94.29+/-0.01(20)			LASSO	80,57±0,07(13)	63,81±0,08(5)	64,82±0,04(18)	72,0±0,17(18)	86,21±0,06(15)	66,19±0,13(20)	91,79±0,02(18)	56,97±0,07(17)	93.78+/-0.0(20)
EN	89,18±0,09(13)	69,12±0,09(20)	71,83±0,06(18)	73,33±0,12(18)	92,09±0,02(20)	87,01±0,06(20)	92,28±0,02(18)	77,43±0,06(19)	94.29+/-0.01(20)			EN	80,57±0,07(13)	63,81±0,08(5)	64,82±0,04(18)	72,0±0,17(18)	86,21±0,06(15)	66,19±0,13(20)	91,79±0,02(18)	56,97±0,07(17)	93.78+/-0.0(20)
SMBA	87,31±0,08(20)	83,16±0,11(15)	73,89±0,04(18)	81,67±0,08(16)	94,24±0,01(20)	88,44±0,02(20)	97,83±0,01(17)	80,79±0,04(20)	95.95+/-0.00(19)			SMBA-CSFS	85,09±0,08(20)	82,98±0,02(20)	68,47±0,11(20)	73,33±0,1(17)	97,84±0,01(17)	94,61±0,04(19)	98,8±0,02(13)	94,13±0,01(20)	98.91+/-0.0(20)
SMBA-CSFS	85,09±0,08(20)	82,98±0,02(20)	68,47±0,11(20)	73,33±0,1(17)	97,84±0,01(17)	94,61±0,04(19)	98,8±0,02(13)	94,13±0,01(20)	98.91+/-0.0(20)			BSL	81,71±0,13	75,23±0,07	70,4±0,1	64±0,12	61,06±0,06	87,81±0,07	55,26±0,09	94,27±0,04	100±0.0
BSL	81,71±0,13	75,23±0,07	70,4±0,1	64±0,12	61,06±0,06	87,81±0,07	55,26±0,09	94,27±0,04	100±0.0
PRECISION, RECALL AND F1-MEASURE (SMBA-CSFS vs TFS)
	ALLAML			LEUKEMIA			CLL_SUB_111			GLIOMA			LUNG			LUNG_DISCRETE			LYMPHOMA			CARCINOM			GCM(14)
	P	R	F	P	R	F	P	R	F	P	R	F	P	R	F	P	R	F	P	R	F	P	R	F	P	R	F1
Fisher	0.97(17)	0.97(17)	0.97	0.98(10)	0.98(10)	0.98	0.72(11)	0.72(11)	0.72	0.74(19)	0.73(19)	0.73	0.92(20)	0.91(20)	0.91	0.85(20)	0.84(20)	0.84	0.96(20)	0.96(20)	0.96	0.64(20)	0.64(20)	0.64	0.6(20)	0.6(20)	0.6
Relief	0.96(6)	0.96(6)	0.96	0.98(10)	0.98(10)	0.98	0.73(20)	0.73(20)	0.73	0.72(15)	0.73(15)	0.72	0.96(20)	0.96(20)	0.96	0.91(19)	0.9(19)	0.9	0.94(20)	0.93(19)	0.93	0.88(18)	0.88(18)	0.88	0.57(20)	0.57(20)	0.57
MRMR	0.78(20)	0.78(20)	0.78	0.98(11)	0.98(11)	0.98	0.62(20)	0.65(20)	0.63	0.66(13)	0.67(13)	0.66	0.92(20)	0.92(20)	0.92	0.9(17)	0.9(17)	0.9	0.96(16)	0.96(16)	0.96	0.93(20)	0.93(20)	0.93	0.76(19)	0.76(19)	0.76
MI	0.97(4)	0.97(4)	0.97	0.98(2)	0.98(2)	0.98	0.76(20)	0.76(20)	0.76	0.76(20)	0.75(20)	0.75	0.95(17)	0.95(17)	0.95	0.93(20)	0.93(20)	0.93	0.95(19)	0.95(19)	0.95	0.93(20)	0.93(20)	0.93	0.62(19)	0.62(19)	0.62
ls_l21	0.84(18)	0.82(18)	0.83	0.87(19)	0.82(18)	0.84	0.68(20)	0.67(15)	0.67	0.71(17)	0.7(17)	0.7	0.93(20)	0.92(20)	0.92	0.86(19)	0.86(15)	0.86	0.87(12)	0.89(19)	0.88	0.78(20)	0.78(20)	0.78	0.63(18)	0.63(18)	0.63
ll_l21	0.92(15)	0.91(15)	0.91	0.84(20)	0.84(20)	0.84	0.65(20)	0.66(20)	0.65	0.7(20)	0.68(19)	0.69	0.97(20)	0.97(20)	0.97	0.88(20)	0.88(13)	0.88	0.91(20)	0.91(20)	0.91	0.8(19)	0.8(19)	0.8	0.72(19)	0.72(19)	0.72
RFS	0.87(20)	0.86(20)	0.86	0.83(20)	0.73(13)	0.78	0.63(20)	0.63(20)	0.63	0.73(13)	0.72(17)	0.72	0.94(20)	0.94(20)	0.94	0.84(20)	0.84(20)	0.84	0.89(20)	0.9(17)	0.89	0.8(19)	0.8(19)	0.8	0.65(20)	0.65(20)	0.65
LASSO	0.86(16)	0.86(16)	0.86	0.75(20)	0.74(20)	0.74	0.71(18)	0.72(18)	0.71	0.74(19)	0.73(19)	0.73	0.92(17)	0.92(17)	0.92	0.9(20)	0.9(20)	0.9	0.93(18)	0.93(18)	0.93	0.78(19)	0.78(19)	0.78	0.6(20)	0.6(20)	0.6
EN	0.86(16)	0.86(16)	0.86	0.75(20)	0.74(20)	0.74	0.71(18)	0.72(18)	0.71	0.74(19)	0.73(19)	0.73	0.92(17)	0.92(17)	0.92	0.9(20)	0.9(20)	0.9	0.93(18)	0.93(18)	0.93	0.78(19)	0.78(19)	0.78	0.6(20)	0.6(20)	0.6
SMRS	0.92(16)	0.91(16)	0.91	0.84(20)	0.84(20)	0.84	0.72(17)	0.72(17)	0.72	0.7(19)	0.7(19)	0.7	0.97(20)	0.97(20)	0.97	0.85(17)	0.85(17)	0.85	0.98(20)	0.98(20)	0.98	0.8(19)	0.8(19)	0.8	0.72(19)	0.72(19)	0.72
SMBA-CSFS	0.86(19)	0.85(19)	0.85	0.83(20)	0.83(20)	0.83	0.67(20)	0.68(20)	0.67	0.69(17)	0.68(17)	0.68	0.99(18)	0.99(18)	0.99	0.96(16)	0.95(16)	0.95	0.99(12)	0.99(12)	0.99	0.99(20)	0.99(20)	0.99	0.90(20)	0.90(20)	0.9
BSL	0.97	0.97	0.97	0.8	0.78	0.789873	0.75	0.78	0.764706	0.8	0.71	0.752318	0.68	0.86	0.759481	0.88	0.88	0.88	0.89	0.89	0.89	0.97	0.98	0.974974	0.96	0.92	0.939574
PRECISION, RECALL AND F1-MEASURE (SMBA-CSFS vs GF-CSFS)
	ALLAML			LEUKEMIA			CLL_SUB_111			GLIOMA			LUNG			LUNG_DISCRETE			LYMPHOMA			CARCINOM			GCM(14)
	P	R	F	P	R	F	P	R	F	P	R	F	P	R	F	P	R	F	P	R	F	P	R	F	P	R	F1
Fisher	0.96(17)	0.96(17)	0.96	0.97(2)	0.97(2)	0.97	0.82(6)	0.82(6)	0.82	0.72(20)	0.72(20)	0.72	0.98(20)	0.98(20)	0.98	0.97(12)	0.97(11)	0.97	0.99(16)	0.99(16)	0.99	0.97(19)	0.97(19)	0.97	0.9(20)	0.9(20)	0.9
Relief	0.98(20)	0.98(20)	0.98	0.97(2)	0.97(2)	0.97	0.83(20)	0.83(20)	0.83	0.67(18)	0.67(18)	0.67	0.98(19)	0.98(19)	0.98	0.96(20)	0.96(20)	0.96	0.99(15)	0.99(15)	0.99	0.96(19)	0.96(12)	0.96	0.9(20)	0.9(20)	0.9
MRMR	0.66(8)	0.66(8)	0.66	0.97(18)	0.97(18)	0.97	0.86(15)	0.86(15)	0.86	0.74(16)	0.73(16)	0.73	0.97(20)	0.97(20)	0.97	0.95(19)	0.95(19)	0.95	0.99(15)	0.99(15)	0.99	0.98(19)	0.98(19)	0.98	0.88(19)	0.88(19)	0.88
MI	0.97(11)	0.97(11)	0.97	0.97(2)	0.97(2)	0.97	0.81(20)	0.81(20)	0.81	0.66(13)	0.65(9)	0.65	0.99(19)	0.99(19)	0.99	0.96(12)	0.96(15)	0.96	0.99(19)	0.99(19)	0.99	0.98(20)	0.98(20)	0.98	0.86(20)	0.86(20)	0.86
ls_l21	0.85(18)	0.81(18)	0.83	0.89(12)	0.87(12)	0.88	0.72(18)	0.71(18)	0.71	0.7(19)	0.7(19)	0.7	0.93(20)	0.93(20)	0.93	0.89(20)	0.88(20)	0.88	0.87(20)	0.89(20)	0.88	0.72(19)	0.72(19)	0.72	0.7(18)	0.7(18)	0.7
ll_l21	0.89(15)	0.89(15)	0.89	0.87(15)	0.87(15)	0.87	0.69(20)	0.69(20)	0.69	0.69(15)	0.68(15)	0.68	0.97(20)	0.97(20)	0.97	0.91(20)	0.9(20)	0.9	0.9(20)	0.91(20)	0.9	0.79(19)	0.79(19)	0.79	0.67(18)	0.67(18)	0.67
RFS	0.85(13)	0.83(13)	0.84	0.93(16)	0.91(16)	0.92	0.65(13)	0.65(13)	0.65	0.59(16)	0.6(16)	0.59	0.94(20)	0.94(20)	0.94	0.92(20)	0.9(20)	0.91	0.9(18)	0.89(19)	0.89	0.8(18)	0.8(18)	0.8	0.69(20)	0.69(20)	0.69
LASSO	0.86(16)	0.86(16)	0.86	0.72(6)	0.71(6)	0.71	0.76(18)	0.76(18)	0.76	0.7(19)	0.65(19)	0.67	0.92(19)	0.92(19)	0.92	0.85(20)	0.86(20)	0.85	0.93(18)	0.92(18)	0.92	0.78(17)	0.78(17)	0.78	0.56(20)	0.56(20)	0.56
EN	0.86(16)	0.86(16)	0.86	0.72(6)	0.71(6)	0.71	0.76(18)	0.76(18)	0.76	0.7(19)	0.65(19)	0.67	0.92(19)	0.92(19)	0.92	0.85(20)	0.86(20)	0.85	0.93(18)	0.92(18)	0.92	0.78(17)	0.78(17)	0.78	0.56(20)	0.56(20)	0.56
SMBA-CSFS	0.86(19)	0.85(19)	0.85	0.83(20)	0.83(20)	0.83	0.67(20)	0.68(20)	0.67	0.69(17)	0.68(17)	0.68	0.99(18)	0.99(18)	0.99	0.96(16)	0.95(16)	0.95	0.99(12)	0.99(12)	0.99	0.99(20)	0.99(20)	0.99	0.90(20)	0.90(20)	0.9
BSL	0.97	0.97	0.97	0.8	0.78	0.789873	0.75	0.78	0.764706	0.8	0.71	0.752318	0.68	0.86	0.759481	0.88	0.88	0.88	0.89	0.89	0.89	0.97	0.98	0.974974	0.96	0.92	0.939574
FRIEDMAN TEST (SMBA-CSFS vs TFS)													FRIEDMAN TEST (SMBA-CSFS vs GF-CSFS)
	ALLAML(2)	LEUKEMIA(2)	CLL_SUB_111(3)	GLIOMA(4)	LUNG_C(5)	LUNG_D(7)	DLBCL(9)	CAR(11)	GCM(14)	CR	CR≥5			ALLAML(2)	LEUKEMIA(2)	CLL_SUB_111(3)	GLIOMA(4)	LUNG_C(5)	LUNG_D(7)	DLBCL(9)	CAR(11)	GCM(14)	CR	CR≥5
Fisher	2.25	2.17	2.35	1.43	8.63	8.8	5.2	10.55	7.4	48.78	40.58		Fisher	1.77	1.93	1.75	3.45	2.8	3.13	2.9	1.85	2.35	21.93	13.03
Relief	1.5	3.17	4.1	2.42	3.42	4.1	5	3	9.93	36.64	25.45		Relief	2.95	3.42	1.3	4.72	3.15	3.67	2.38	3.7	1.85	27.14	14.75
MRMR	7.33	2.52	9.8	8.13	7.35	2.6	2.45	5.3	2.05	47.53	19.75		MRMR	10.63	2.35	6.8	8.47	7.85	2.7	5.85	5.6	4	54.25	26
MI	2.25	2.13	2.35	4	3.15	7.05	4.4	2.05	4.45	31.83	21.1		MI	1.27	2.3	3.05	1.18	2.6	4.65	1.68	2.2	4.35	23.28	15.48
ls_l21	6.95	9.28	7.95	8.32	9.97	7.65	9.7	8.65	6.65	75.12	42.62		ls_l21	7.5	9.07	7.05	9.05	9.75	8.05	6.25	9.8	6.25	72.77	40.1
ll_l21	9.65	5.95	6.9	5.8	4	7.25	10.4	7.9	6.6	64.45	36.15		ll_l21	7.85	6.85	7.65	4.92	5.42	9.03	8.9	8.2	8.9	67.72	40.45
RFS	9.75	9.57	9	9.7	9.3	9.05	9.35	4.95	6.92	77.59	39.57		RFS	8.22	7.97	8.1	8.9	8.22	6.67	7.25	6.65	7.4	69.38	36.19
LASSO	6.05	9.4	6.17	7.67	7.47	5.85	7.1	7.35	7.08	64.14	34.85		LASSO	6.45	10	7.63	5.4	6.88	8.05	6.3	7.25	8.7	66.66	37.18
EN	6.05	9.4	6.17	7.67	7.47	5.85	7.1	7.35	7.08	64.14	34.85		EN	6.45	10	7.63	5.4	6.88	8.05	6.3	7.25	8.7	66.66	37.18
SMBA	5.55	5.95	2.7	5	4.17	6.8	3.65	7.9	6.6	48.32	29.12		SMBA-CSFS	8.05	6.55	4.05	3.5	1.35	1	2.5	1.25	2.5	30.75	8.6
SMBA-CSFS	8.68	6.45	8.5	5.85	1.05	1	1.5	1	1.25	35.28	5.8
POST-HOC TEST (SMBA-CSFS vs TFS)												POST-HOC TEST (SMBA-CSFS vs GF-CSFS)
	ALLAML(2)	LEUKEMIA(2)	CLL_SUB_111(3)	GLIOMA(4)	LUNG_C(5)	LUNG_D(7)	DLBCL(9)	CAR(11)	GCM(14)				ALLAML(2)	LEUKEMIA(2)	CLL_SUB_111(3)	GLIOMA(4)	LUNG_C(5)	LUNG_D(7)	DLBCL(9)	CAR(11)	GCM(14)
Fisher	4.95646e-08	0.00251937	2.48823e-07	0.0013492	2.80764e-11	5.66658e-12	0.0391777	0	2.48823e-07			Fisher	1.20502e-07	0.000569157	0.733212	1	1	1	1	1	1
Relief	4.32248e-10	0.098597	0.00149924	0.0600758	1	0.171559	0.0771472	1	1.22125e-14			Relief	6.37005e-05	0.158759	0.183384	1	1	0.234311	1	1	1
MRMR	1	0.0100273	1	1	1.04062e-07	1	1	0.00227341	1			MRMR	0.774507	0.00341756	0.183384	9.15227e-06	1.04213e-09	1	0.00764374	0.00221473	1
MI	4.95646e-08	0.00205036	2.48823e-07	1	1	4.40025e-07	0.480754	1	0.125411			MI	5.76975e-09	0.00279041	1	0.682484	1	0.00619557	1	1	1
ls_l21	1	0.388847	1	1	0	1.2594e-08	9.03722e-13	1.65479e-11	1.44265e-05			ls_l21	1	0.883436	0.0777578	3.0419e-07	0	8.06355e-12	0.00791462	1.39888e-13	0.00403883
ll_l21	1	1	1	1	0.270189	1.39462e-07	0	2.60682e-09	1.85801e-05			ll_l21	1	1	0.00764374	1	0.00148473	0	5.14213e-10	2.31591e-08	1.04213e-09
RFS	1	0.158759	1	0.013297	1.95399e-13	9.03722e-13	1.16018e-11	0.00911714	3.44898e-06			RFS	1	1	0.0010512	7.6471e-07	6.66467e-11	1.38543e-07	4.45039e-05	0.000194131	1.39043e-05
LASSO	0.677608	0.270189	1	1	4.95646e-08	0.000206732	1.11769e-05	7.7476e-08	1.53634e-06			LASSO	1	0.0552117	0.00848197	1	6.5689e-07	8.06355e-12	0.00629592	7.95087e-06	4.24711e-09
EN	0.677608	0.270189	1	1	4.95646e-08	0.000206732	1.11769e-05	7.7476e-08	1.53634e-06			EN	1	0.0552117	0.00848197	1	6.5689e-07	8.06355e-12	0.00629592	7.95087e-06	4.24711e-09
SMBA	0.158759	1	1.76044e-06	1	0.158759	1.76044e-06	1	2.60682e-09	1.85801e-05

## Sheet: No. 80 features
AVERAGE ACCURACY (SMBA-CSFS vs TFS)												AVERAGE ACCURACY (SMBA-CSFS vs GF-CSFS)
	ALLAML(2)	LEUKEMIA(2)	CLL_SUB_111(3)	GLIOMA(4)	LUNG_C(5)	LUNG_D(7)	DLBCL(9)	CAR(11)	GCM(14)				ALLAML(2)	LEUKEMIA(2)	CLL_SUB_111(3)	GLIOMA(4)	LUNG_C(5)	LUNG_D(7)	DLBCL(9)	CAR(11)	GCM(14)
Fisher	96,84±0,03(41)	97,89±0,03(8)	75,85±0,03(17)	90,0±0,03(78)	98,13±0,01(77)	97,26±0,03(79)	98,55±0,02(41)	93,95±0,03(80)	97.76+/-0.00(80)			Fisher	97,24±0,03(51)	97,33±0,03(10)	82,85±0,05(64)	82,0±0,12(76)	95,56±0,03(71)	87,81±0,07(76)	99,28±0,01(41)	96,57±0,03(61)	99.39+/-0.0(79)
Relief	97,89±0,03(18)	97,89±0,03(13)	74,54±0,04(69)	85,0±0,06(21)	98,56±0,01(80)	98,64±0,02(67)	97,83±0,02(71)	96,97±0,01(79)	98.37+/-0.01(76)			Relief	97,24±0,03(21)	95,9±0,03(21)	81,11±0,09(75)	76,0±0,1(51)	95,55±0,04(69)	89,14±0,09(50)	99,12±0,01(49)	97,71±0,03(70)	99.56+/-0.0(79)
MRMR	88,25±0,05(42)	97,89±0,03(5)	71,96±0,06(77)	71,67±0,12(13)	97,99±0,01(60)	97,98±0,03(60)	99,04±0,01(26)	95,62±0,02(61)	99.05+/-0.00(77)			MRMR	76,57±0,11(79)	97,24±0,03(8)	57,83±0,1(13)	64,0±0,1(79)	91,61±0,03(71)	89,14±0,07(49)	91,41±0,04(80)	91,32±0,03(80)	99.46+/-0.0(77)
MI	96,84±0,04(27)	97,89±0,03(8)	77,14±0,03(44)	85,0±0,06(51)	98,27±0,01(62)	97,29±0,01(52)	98,55±0,01(77)	97,97±0,02(74)	97.79+/-0.01(80)			MI	97,24±0,03(35)	97,33±0,03(17)	75,69±0,06(44)	80,0±0,09(28)	96,52±0,03(69)	87,81±0,07(59)	99,28±0,01(38)	96,55±0,01(45)	99.46+/-0.0(76)
ls_l21	80,64±0,12(9)	83,92±0,08(20)	68,02±0,1(57)	71,67±0,1(72)	93,38±0,05(48)	97,98±0,03(69)	91,3±0,04(41)	94,26±0,04(76)	98.74+/-0.00(79)			ls_l21	77,43±0,23(35)	69,52±0,22(22)	58,5±0,08(12)	68,0±0,07(48)	86,68±0,03(47)	89,14±0,07(45)	93,01±0,05(27)	78,17±0,03(73)	98.5+/-0.0(62)
ll_l21	95,73±0,04(67)	92,57±0,04(52)	75,18±0,05(28)	86,67±0,04(34)	98,42±0,01(38)	96,57±0,02(79)	96,86±0,03(62)	93,24±0,03(77)	98.81+/-0.00(75)			ll_l21	88,86±0,06(55)	90,19±0,06(69)	63,91±0,07(44)	72,0±0,17(47)	93,61±0,07(36)	82,19±0,09(79)	96,14±0,02(78)	78,79±0,06(72)	97.99+/-0.01(79)
RFS	86,02±0,1(67)	85,96±0,1(31)	73,14±0,04(36)	73,33±0,08(37)	94,53±0,03(31)	97,29±0,03(72)	90,09±0,05(32)	95,95±0,03(79)	99.18+/-0.00(74)			RFS	84,76±0,08(54)	75,05±0,24(16)	60,4±0,04(70)	74,0±0,14(39)	84,27±0,04(21)	87,81±0,08(68)	93,01±0,04(28)	84,49±0,04(80)	98.91+/-0.0(76)
LASSO	93,63±0,06(38)	90,35±0,06(62)	77,14±0,07(56)	81,67±0,06(41)	98,13±0,01(37)	95,22±0,04(65)	97,11±0,01(33)	94,94±0,03(80)	98.2+/-0.01(76)			LASSO	90,29±0,07(57)	85,05±0,11(56)	64,82±0,04(18)	76,0±0,14(40)	94,59±0,01(53)	78,29±0,06(77)	97,35±0,01(59)	80,52±0,1(78)	97.59+/-0.0(74)
EN	93,63±0,06(38)	90,35±0,06(62)	77,14±0,07(56)	81,67±0,06(41)	98,13±0,01(37)	95,22±0,04(65)	97,11±0,01(33)	94,94±0,03(80)	98.2+/-0.01(76)			EN	90,29±0,07(57)	85,05±0,11(56)	64,82±0,04(18)	76,0±0,14(40)	94,59±0,01(53)	78,29±0,06(77)	97,35±0,01(59)	80,52±0,1(78)	97.59+/-0.0(74)
SMBA	96,84±0,03(79)	92,57±0,04(52)	79,78±0,04(80)	88,33±0,04(32)	98,56±0,01(62)	97,26±0,03(68)	99,04±0,01(69)	93,24±0,03(77)	98.81+/-0.00(75)			SMBA-CSFS	95,73±0,02(42)	89,47±0,07(58)	73,08±0,09(29)	80,0±0,07(40)	99,14±0,01(49)	97,98±0,03(70)	99,51±0,01(35)	98,03±0,02(66)	99.71+/-0.01(69)
SMBA-CSFS	95,73±0,02(42)	89,47±0,07(58)	73,08±0,09(29)	80,0±0,07(40)	99,14±0,01(49)	97,98±0,03(70)	99,51±0,01(35)	98,03±0,02(66)	99.71+/-0.01(69)			BSL	81,71±0,13	75,23±0,07	70,4±0,1	64±0,12	61,06±0,06	87,81±0,07	55,26±0,09	94,27±0,04	100±0.0
BSL	81.71±0.13	75.23±0.07	70.4±0.1	64±0.12	61.06±0.06	87.81±0.07	55.26±0.09	94.27±0.04	100±0.0
PRECISION, RECALL AND F1-MEASURE (SMBA-CSFS vs TFS)
	ALLAML			LEUKEMIA			CLL_SUB_111			GLIOMA			LUNG			LUNG_DISCRETE			LYMPHOMA			CARCINOM			GCM(14)
	P	R	F	P	R	F	P	R	F	P	R	F	P	R	F	P	R	F	P	R	F	P	R	F	P	R	F1
Fisher	0.98(75)	0.98(75)	0.98	0.98(10)	0.98(10)	0.98	0.73(73)	0.73(73)	0.73	0.8(35)	0.8(35)	0.8	0.98(75)	0.98(75)	0.98	0.96(79)	0.96(79)	0.96	0.99(65)	0.99(65)	0.99	0.96(80)	0.96(80)	0.96	0.84(80)	0.84(80)	0.84
Relief	0.98(33)	0.98(33)	0.98	0.98(10)	0.98(10)	0.98	0.78(30)	0.78(30)	0.78	0.81(36)	0.8(80)	0.8	0.98(78)	0.98(78)	0.98	0.95(65)	0.95(65)	0.95	0.97(53)	0.97(53)	0.97	0.99(75)	0.99(75)	0.99	0.89(76)	0.89(76)	0.89
MRMR	0.9(68)	0.88(68)	0.89	0.98(11)	0.98(11)	0.98	0.7(72)	0.71(65)	0.7	0.72(80)	0.72(80)	0.72	0.98(80)	0.98(80)	0.98	0.97(71)	0.97(71)	0.97	0.99(39)	0.99(39)	0.99	0.98(73)	0.98(73)	0.98	0.93(77)	0.93(77)	0.93
MI	0.97(4)	0.97(4)	0.97	0.98(2)	0.98(2)	0.98	0.79(31)	0.79(31)	0.79	0.84(26)	0.83(26)	0.83	0.98(76)	0.98(66)	0.98	0.97(59)	0.97(59)	0.97	0.98(67)	0.98(42)	0.98	0.99(52)	0.99(52)	0.99	0.85(80)	0.85(80)	0.85
ls_l21	0.85(32)	0.82(18)	0.83	0.87(19)	0.82(18)	0.84	0.73(79)	0.7(24)	0.71	0.78(66)	0.75(66)	0.76	0.96(38)	0.95(38)	0.95	0.98(64)	0.97(64)	0.97	0.91(49)	0.9(49)	0.9	0.95(79)	0.95(79)	0.95	0.91(79)	0.91(79)	0.91
ll_l21	0.95(61)	0.95(61)	0.95	0.95(73)	0.95(73)	0.95	0.71(35)	0.72(35)	0.71	0.77(57)	0.78(57)	0.77	0.98(36)	0.98(36)	0.98	0.96(77)	0.96(77)	0.96	0.97(55)	0.97(51)	0.97	0.94(78)	0.94(78)	0.94	0.92(75)	0.92(75)	0.92
RFS	0.89(37)	0.86(20)	0.87	0.86(39)	0.81(39)	0.83	0.71(46)	0.67(24)	0.69	0.83(70)	0.82(70)	0.82	0.94(20)	0.94(20)	0.94	0.98(73)	0.97(73)	0.97	0.92(34)	0.91(23)	0.91	0.95(80)	0.95(78)	0.95	0.94(74)	0.94(74)	0.94
LASSO	0.97(68)	0.97(68)	0.97	0.94(63)	0.93(63)	0.93	0.75(58)	0.76(58)	0.75	0.86(59)	0.83(59)	0.84	0.99(42)	0.99(42)	0.99	0.96(43)	0.96(43)	0.96	0.98(76)	0.98(75)	0.98	0.94(80)	0.94(80)	0.94	0.87(76)	0.87(76)	0.87
EN	0.97(68)	0.97(68)	0.97	0.94(63)	0.93(63)	0.93	0.75(58)	0.76(58)	0.75	0.86(59)	0.83(59)	0.84	0.99(42)	0.99(42)	0.99	0.96(43)	0.96(43)	0.96	0.98(76)	0.98(75)	0.98	0.94(80)	0.94(80)	0.94	0.87(76)	0.87(76)	0.87
SMRS	0.94(45)	0.94(31)	0.94	0.95(73)	0.95(73)	0.95	0.72(17)	0.72(17)	0.72	0.8(52)	0.8(52)	0.8	0.99(71)	0.99(71)	0.99	0.95(53)	0.95(53)	0.95	0.99(77)	0.99(77)	0.99	0.94(78)	0.94(78)	0.94	0.92(75)	0.92(75)	0.92
SMBA-CSFS	0.94(48)	0.94(48)	0.94	0.93(53)	0.93(53)	0.93	0.71(47)	0.72(47)	0.71	0.81(50)	0.82(50)	0.81	0.99(47)	0.99(42)	0.99	0.97(52)	0.97(52)	0.97	1.0(57)	1.0(57)	1	0.99(73)	0.99(51)	0.99	0.98(79)	0.98(79)	0.98
BSL	0.97	0.97	0.97	0.8	0.78	0.789873	0.75	0.78	0.764706	0.8	0.71	0.752318	0.68	0.86	0.759481	0.88	0.88	0.88	0.89	0.89	0.89	0.97	0.98	0.974974	0.96	0.92	0.939574
PRECISION, RECALL AND F1-MEASURE (SMBA-CSFS vs GF-CSFS)
	ALLAML			LEUKEMIA			CLL_SUB_111			GLIOMA			LUNG			LUNG_DISCRETE			LYMPHOMA			CARCINOM			GCM(14)
	P	R	F	P	R	F	P	R	F	P	R	F	P	R	F	P	R	F	P	R	F	P	R	F	P	R	F1
Fisher	0.97(33)	0.97(33)	0.97	0.97(2)	0.97(2)	0.97	0.82(6)	0.82(6)	0.82	0.75(61)	0.75(61)	0.75	0.99(75)	0.99(75)	0.99	0.97(12)	0.97(11)	0.97	1.0(40)	1.0(40)	1	0.99(63)	0.99(63)	0.99	0.96(47)	0.96(47)	0.96
Relief	0.99(38)	0.99(38)	0.99	0.97(2)	0.97(2)	0.97	0.86(30)	0.86(29)	0.86	0.76(39)	0.75(39)	0.75	0.99(48)	0.99(48)	0.99	0.97(76)	0.97(76)	0.97	1.0(40)	1.0(40)	1	0.99(80)	0.99(80)	0.99	0.97(79)	0.97(79)	0.97
MRMR	0.82(51)	0.82(51)	0.82	0.97(18)	0.97(18)	0.97	0.86(15)	0.86(15)	0.86	0.81(45)	0.8(31)	0.8	0.99(41)	0.99(38)	0.99	0.96(34)	0.96(34)	0.96	1.0(45)	1.0(45)	1	0.99(52)	0.99(52)	0.99	0.96(77)	0.96(77)	0.96
MI	0.97(23)	0.97(11)	0.97	0.97(2)	0.97(2)	0.97	0.84(74)	0.84(74)	0.84	0.75(32)	0.75(32)	0.75	0.99(60)	0.99(60)	0.99	0.97(28)	0.97(28)	0.97	1.0(53)	1.0(53)	1	0.97(50)	0.97(50)	0.99	0.96(76)	0.96(76)	0.96
ls_l21	0.88(37)	0.84(37)	0.86	0.89(12)	0.87(12)	0.88	0.72(18)	0.71(18)	0.71	0.75(39)	0.75(39)	0.75	0.96(26)	0.96(26)	0.96	0.96(71)	0.96(70)	0.96	0.92(31)	0.91(56)	0.91	0.9(80)	0.9(80)	0.9	0.9(62)	0.9(62)	0.9
ll_l21	0.95(65)	0.95(65)	0.95	0.94(80)	0.94(80)	0.94	0.76(47)	0.76(47)	0.76	0.72(44)	0.72(35)	0.72	0.98(42)	0.98(42)	0.98	0.95(75)	0.95(75)	0.95	0.97(51)	0.96(51)	0.96	0.96(75)	0.96(75)	0.96	0.86(79)	0.86(79)	0.86
RFS	0.87(43)	0.83(13)	0.85	0.93(16)	0.91(16)	0.92	0.73(79)	0.71(40)	0.72	0.74(78)	0.73(78)	0.73	0.97(36)	0.97(36)	0.97	0.96(41)	0.95(35)	0.95	0.93(69)	0.93(69)	0.93	0.92(77)	0.92(77)	0.92	0.92(76)	0.92(76)	0.92
LASSO	0.96(78)	0.96(78)	0.96	0.9(55)	0.88(56)	0.89	0.76(58)	0.76(57)	0.76	0.81(72)	0.8(72)	0.8	0.98(49)	0.98(46)	0.98	0.91(45)	0.91(45)	0.91	0.98(72)	0.98(72)	0.98	0.94(80)	0.94(69)	0.94	0.83(74)	0.83(74)	0.83
EN	0.96(78)	0.96(78)	0.96	0.9(55)	0.88(56)	0.89	0.76(58)	0.76(57)	0.76	0.81(72)	0.8(72)	0.8	0.98(49)	0.98(46)	0.98	0.91(45)	0.91(45)	0.91	0.98(72)	0.98(72)	0.98	0.94(80)	0.94(69)	0.94	0.83(74)	0.83(74)	0.83
SMBA-CSFS	0.94(48)	0.94(48)	0.94	0.93(53)	0.93(53)	0.93	0.71(47)	0.72(47)	0.71	0.81(50)	0.82(50)	0.81	0.99(47)	0.99(42)	0.99	0.97(52)	0.97(52)	0.97	1.0(57)	1.0(57)	1	0.99(73)	0.99(51)	0.99	0.98(79)	0.98(79)	0.98
BSL	0.97	0.97	0.97	0.8	0.78	0.789873	0.75	0.78	0.764706	0.8	0.71	0.752318	0.68	0.86	0.759481	0.88	0.88	0.88	0.89	0.89	0.89	0.97	0.98	0.974974	0.96	0.92	0.939574
FRIEDMAN TEST (SMBA-CSFS vs TFS)													FRIEDMAN TEST (SMBA-CSFS vs GF-CSFS)
	ALLAML(2)	LEUKEMIA(2)	CLL_SUB_111(3)	GLIOMA(4)	LUNG_C(5)	LUNG_D(7)	DLBCL(9)	CAR(11)	GCM(14)	CR	CR≥5			ALLAML(2)	LEUKEMIA(2)	CLL_SUB_111(3)	GLIOMA(4)	LUNG_C(5)	LUNG_D(7)	DLBCL(9)	CAR(11)	GCM(14)	CR	CR≥5
Fisher	2.31	2.21	5.09	2.33	8.69	7.13	3.64	10.76	9.81	51.97	40.03		Fisher	2.61	2.39	1.74	2.88	3.17	4.99	2.43	2.52	2.99	25.72	16.1
Relief	1.21	3.23	5.38	5.27	4.43	2.67	6.24	3.86	8.01	40.3	25.21		Relief	1.56	3.24	1.46	4.85	3.18	3.65	1.72	3.38	2.36	25.4	14.29
MRMR	8.86	2.34	9.22	10.11	7.48	2.23	1.99	4.25	2.2	48.68	18.15		MRMR	10.71	1.97	8.23	9.53	7.81	3.83	5.21	5.3	3.65	56.24	25.8
MI	2.52	2.22	2.49	3.26	5.07	6.5	5.13	1.69	8.48	37.36	26.87		MI	1.86	2.42	3.1	2.39	3.21	4.31	2.33	2.74	4.53	26.89	17.12
ls_l21	9.95	10.42	10.05	9.51	10.32	5.61	10.09	7.34	6.18	79.47	39.54		ls_l21	9.44	10.2	8.85	8.82	9.32	5.24	7.97	9.94	6.7	76.48	39.17
ll_l21	7.2	5.86	5.52	3.66	3.51	8.76	9	8.38	4.79	56.68	34.44		ll_l21	6.94	6.52	6.08	6.46	5.74	8.61	7.59	7.84	8.22	64	38
RFS	9.63	9.24	8.8	9.2	10.2	6.95	10.42	4.24	4.31	72.99	36.12		RFS	8.51	9.54	8.07	7.83	9.38	5.59	7.98	6.59	6.46	69.95	36
LASSO	5.75	8.72	3.98	6.22	6.04	8.59	7.1	7.88	8.18	62.46	37.79		LASSO	7.09	8.91	6.86	4.64	6.03	8.89	5.73	7.71	9.3	65.16	37.66
EN	5.75	8.72	3.98	6.22	6.04	8.59	7.1	7.88	8.18	62.46	37.79		EN	7.09	8.91	6.86	4.64	6.03	8.89	5.73	7.71	9.3	65.16	37.66
SMBA	5.18	5.86	3.83	3.06	3.1	6.87	1.98	8.38	4.79	43.05	25.12		SMBA-CSFS	5.74	6.06	3.74	2.96	1.11	1	1.28	1.06	1.48	24.43	5.93
SMBA-CSFS	7.65	7.17	7.69	7.16	1.12	2.09	1.02	1.15	1.06	36.11	6.44
POST-HOC TEST (SMBA-CSFS vs TFS)												POST-HOC TEST (SMBA-CSFS vs GF-CSFS)
	ALLAML(2)	LEUKEMIA(2)	CLL_SUB_111(3)	GLIOMA(4)	LUNG_C(5)	LUNG_D(7)	DLBCL(9)	CAR(11)	GCM(14)				ALLAML(2)	LEUKEMIA(2)	CLL_SUB_111(3)	GLIOMA(4)	LUNG_C(5)	LUNG_D(7)	DLBCL(9)	CAR(11)	GCM(14)
Fisher	0	0	3.91713e-05	0	0	0	1	0	0			Fisher	1.29645e-07	1.33006e-10	0.00132417	1	0.000739906	0	0.501162	0.707448	0.0679944
Relief	0	3.00426e-12	0.000569157	0.0175477	1.46974e-08	1	1.43493e-06	9.67817e-05	0			Relief	8.54872e-14	4.20865e-06	9.04931e-05	0.00343091	0.000697444	1.39519e-06	4.13765e-05	0.0011802	1
MRMR	1	0	0.19253	1.01776e-06	0	1	0.612144	1.76044e-06	1			MRMR	0	3.17524e-13	0	0	0	1.62358e-07	3.9968e-14	0	0.000249062
MI	0	0	0	6.20393e-12	2.73559e-12	0	0.03148	1	0			MI	8.12128e-12	2.21155e-10	1	1	0.000549709	2.03837e-10	0.0191522	0.175948	7.74834e-09
ls_l21	0.000635208	3.40292e-08	0.000364861	0.000385898	0	9.86461e-10	0	0	0			ls_l21	9.45e-11	1.70974e-13	0	0	0	0	0	0	0
ll_l21	1	0.677608	0.00194678	1.36685e-09	0.000291174	0	0	0	6.14531e-11			ll_l21	1	1	4.40279e-05	1.08014e-11	0	0	0	0	0
RFS	0.00911714	0.00438989	1	0.00535039	0	0	0	2.01611e-06	3.40292e-08			RFS	7.11291e-06	1.88973e-09	0	0	0	0	0	0	0
LASSO	0.0160065	0.178306	7.95886e-11	1	0	0	3.0641e-11	0	0			LASSO	0.533619	3.22666e-06	3.00118e-09	0.0190515	0	0	0.000129598	0	0
EN	0.0160065	0.178306	7.95886e-11	1	0	0	3.0641e-11	0	0			EN	0.533619	3.22666e-06	3.00118e-09	0.0190515	0	0	0.000129598	0	0
SMBA	0.000137776	0.677608	9.7089e-12	2.93099e-13	0.00869178	0	0.591606	0	6.14531e-11
