# Supplementary material for: A Sparse-Modeling Based Approach for Class Specific Feature Selection
Source: PeerJ Comput Sci. 2019 Nov 18;5:e237. doi: 10.7717/peerj-cs.237 (PMC7924712; doi:10.7717/peerj-cs.237)
Supplement: Supplemental Information 10 — The model evaluation metrics were computed taking into account the top 20 and 80 selected features with a 5 k-fold CV. [file peerj-cs-05-237-s010.xlsx]

## Sheet: No. 20 features
AVERAGE ACCURACY (SMBA-CSFS vs TFS)												AVERAGE ACCURACY (SMBA-CSFS vs GF-CSFS)
	ALLAML(2)	LEUKEMIA(2)	CLL_SUB_111(3)	GLIOMA(4)	LUNG_C(5)	LUNG_D(7)	DLBCL(9)	CAR(11)	GCM(14)				ALLAML(2)	LEUKEMIA(2)	CLL_SUB_111(3)	GLIOMA(4)	LUNG_C(5)	LUNG_D(7)	DLBCL(9)	CAR(11)	GCM(14)
Fisher	95,79±0,05(8)	98,95±0,02(8)	75,2±0,06(10)	81,67±0,11(15)	91,8±0,02(20)	81,63±0,06(18)	97,83±0,01(16)	61,28±0,05(20)	95.1+/-0.01(19)			Fisher	94,48±0,03(7)	98,67±0,03(8)	78,38±0,07(14)	78,0±0,1(19)	93,13±0,07(16)	84,95±0,07(18)	97,83±0,02(16)	89,13±0,07(8)	97.69+/-0.0(20)
Relief	95,79±0,06(6)	97,89±0,03(3)	71,94±0,04(4)	80,0±0,08(17)	95,4±0,02(20)	87,72±0,05(15)	98,07±0,01(20)	82,83±0,04(20)	94.32+/-0.01(20)			Relief	93,05±0,05(8)	95,9±0,03(9)	81,11±0,05(9)	70,0±0,15(18)	93,15±0,05(20)	79,71±0,09(13)	98,55±0,01(15)	82,81±0,06(10)	97.28+/-0.0(15)
MRMR	75,38±0,09(5)	97,89±0,03(19)	62,8±0,11(12)	75,0±0,11(19)	93,24±0,03(16)	87,06±0,07(19)	98,79±0,01(12)	83,84±0,05(20)	96.53+/-0.01(19)			MRMR	73,62±0,05(10)	97,24±0,03(6)	57,59±0,05(8)	60,0±0,11(14)	84,27±0,06(19)	86,48±0,07(14)	99,76±0,0(5)	82,24±0,05(19)	97.69+/-0.0(18)
MI	95,79±0,06(6)	98,95±0,02(8)	74,58±0,09(9)	80,0±0,08(11)	95,11±0,01(16)	82,32±0,08(17)	95,65±0,01(20)	91,93±0,02(20)	95.44+/-0.00(20)			MI	94,57±0,05(14)	98,67±0,03(11)	70,24±0,13(20)	78,0±0,07(7)	94,57±0,04(20)	79,81±0,13(20)	98,31±0,02(5)	89,13±0,08(14)	98.47+/-0.0(20)
ls_l21	80,58±0,15(20)	82,11±0,1(20)	71,29±0,07(19)	68,33±0,1(13)	90,22±0,03(14)	80,23±0,08(20)	90,09±0,04(11)	72,74±0,06(19)	95.41+/-0.01(20)			ls_l21	75,24±0,18(10)	72,1±0,1(19)	56,64±0,11(20)	62,0±0,12(15)	80,77±0,03(19)	78,29±0,11(20)	89,87±0,06(9)	38,52±0,08(20)	95.03+/-0.0(18)
ll_l21	81,64±0,14(20)	80,88±0,07(20)	64,09±0,08(8)	73,33±0,1(16)	95,83±0,01(20)	83,59±0,08(16)	90,34±0,03(14)	76,75±0,04(19)	95.54+/-0.01(18)			ll_l21	75,05±0,07(15)	73,24±0,11(18)	56,6±0,11(2)	62,0±0,13(18)	90,17±0,05(20)	76,95±0,08(18)	89,14±0,03(17)	57,51±0,08(20)	93.98+/-0.01(18)
RFS	79,71±0,13(20)	86,2±0,07(20)	69,29±0,06(18)	70,0±0,08(19)	91,08±0,04(15)	80,92±0,08(20)	91,54±0,04(19)	79,47±0,06(20)	95.0+/-0.00(20)			RFS	80,57±0,12(13)	83,33±0,11(20)	57,55±0,1(19)	62,0±0,12(16)	82,3±0,05(18)	80,95±0,06(20)	92,28±0,04(19)	58,5±0,18(17)	95.03+/-0.0(18)
LASSO	83,92±0,06(13)	72,34±0,04(15)	67,98±0,06(18)	68,33±0,06(15)	88,63±0,02(13)	79,49±0,08(11)	92,77±0,03(18)	70,72±0,06(19)	94.56+/-0.01(12)			LASSO	80,76±0,11(12)	70,67±0,07(8)	54,9±0,11(11)	66,0±0,16(8)	88,22±0,07(17)	67,14±0,12(19)	92,52±0,04(20)	55,76±0,07(17)	93.16+/-0.01(14)
EN	83,92±0,06(13)	72,34±0,04(15)	67,98±0,06(18)	68,33±0,06(15)	88,63±0,02(13)	79,49±0,08(11)	92,77±0,03(18)	70,72±0,06(19)	94.56+/-0.01(12)			EN	80,76±0,11(12)	70,67±0,07(8)	54,9±0,11(11)	66,0±0,16(8)	88,22±0,07(17)	67,14±0,12(19)	92,52±0,04(20)	55,76±0,07(17)	93.16+/-0.01(14)
SMBA	87,25±0,02(12)	80,88±0,07(20)	73,89±0,04(12)	75,0±0,07(16)	94,39±0,01(14)	88,41±0,03(20)	98,55±0,01(19)	76,75±0,04(19)	95.54+/-0.01(18)			SMBA-CSFS	82,98±0,05(13)	82,98±0,07(20)	67,18±0,09(5)	66,67±0,07(17)	96,12±0,01(16)	89,79±0,03(18)	98,89±0,02(20)	96,19±0,03(20)	97.99+/-0.0(8)
SMBA-CSFS	82,98±0,05(13)	82,98±0,07(20)	67,18±0,09(5)	66,67±0,07(17)	96,12±0,01(16)	89,79±0,03(18)	98,89±0,02(20)	96,19±0,03(20)	97.99+/-0.0(8)			BSL	82±0,11	87,43±0,03	53,28±0,11	80±0,11	94,1±0,03	79,52±0,08	89,63±0,073	76,42±0,023	100±0.0
BSL	82±0,11	87,43±0,03	53,28±0,11	80±0,11	94,1±0,03	79,52±0,08	89,63±0,073	76,42±0,023	100±0.0
PRECISION, RECALL AND F1-MEASURE (SMBA-CSFS vs TFS)
	ALLAML(2)			LEUKEMIA(2)			CLL_SUB_111(3)			GLIOMA(3)			LUNG_C(5)			LUNG_D(7)			DLBCL(9)			CAR(11)			GCM(14)
	P	R	F1	P	R	F1	P	R	F1	P	R	F1	P	R	F1	P	R	F1	P	R	F1	P	R	F1	P	R	F1
Fisher	0.97(19)	0.97(19)	0.97	0.98(12)	0.98(12)	0.98	0.74(6)	0.74(6)	0.74	0.78(14)	0.77(14)	0.77	0.93(19)	0.93(19)	0.93	0.84(20)	0.8(20)	0.82	0.98(19)	0.98(19)	0.98	0.66(20)	0.66(20)	0.66	0.68(19)	0.66(19)	0.67
Relief	0.97(20)	0.97(20)	0.97	0.99(4)	0.99(4)	0.99	0.75(20)	0.75(20)	0.75	0.74(14)	0.73(7)	0.73	0.96(20)	0.96(20)	0.96	0.89(19)	0.89(19)	0.89	0.97(19)	0.97(19)	0.97	0.85(18)	0.84(18)	0.84	0.61(20)	0.6(20)	0.6
MRMR	0.8(20)	0.8(20)	0.8	0.98(10)	0.98(10)	0.98	0.66(19)	0.67(10)	0.66	0.65(18)	0.65(11)	0.65	0.92(20)	0.91(18)	0.91	0.87(20)	0.86(20)	0.86	0.97(17)	0.97(17)	0.97	0.9(14)	0.9(16)	0.9	0.78(20)	0.76(19)	0.77
MI	0.96(2)	0.96(2)	0.96	0.98(2)	0.98(2)	0.98	0.76(13)	0.76(13)	0.76	0.71(18)	0.7(18)	0.7	0.95(20)	0.95(20)	0.95	0.9(20)	0.87(20)	0.88	0.96(20)	0.95(19)	0.95	0.92(19)	0.92(19)	0.92	0.71(17)	0.68(20)	0.69
ls_l21	0.85(18)	0.83(20)	0.84	0.9(19)	0.87(18)	0.88	0.6(13)	0.6(13)	0.6	0.64(16)	0.62(16)	0.63	0.92(20)	0.91(20)	0.91	0.85(16)	0.82(16)	0.83	0.91(12)	0.9(16)	0.9	0.76(20)	0.74(20)	0.75	0.72(20)	0.68(20)	0.7
ll_l21	0.8(19)	0.79(19)	0.79	0.82(20)	0.79(14)	0.8	0.71(20)	0.71(20)	0.71	0.66(15)	0.63(15)	0.64	0.96(20)	0.96(20)	0.96	0.88(16)	0.86(16)	0.87	0.93(17)	0.92(17)	0.92	0.77(19)	0.77(19)	0.77	0.72(18)	0.69(18)	0.7
RFS	0.84(20)	0.83(20)	0.83	0.82(18)	0.77(19)	0.79	0.62(19)	0.63(18)	0.62	0.71(19)	0.7(19)	0.7	0.92(18)	0.91(18)	0.91	0.83(19)	0.81(14)	0.82	0.9(13)	0.9(16)	0.9	0.72(19)	0.73(19)	0.72	0.67(19)	0.65(20)	0.66
LASSO	0.83(13)	0.83(11)	0.83	0.75(20)	0.7(9)	0.72	0.68(8)	0.69(8)	0.68	0.66(14)	0.65(14)	0.65	0.91(15)	0.89(15)	0.9	0.86(19)	0.84(19)	0.85	0.94(15)	0.93(15)	0.93	0.71(20)	0.71(20)	0.71	0.64(18)	0.62(12)	0.63
EN	0.83(13)	0.83(11)	0.83	0.75(20)	0.7(9)	0.72	0.68(8)	0.69(8)	0.68	0.66(14)	0.65(14)	0.65	0.91(15)	0.89(15)	0.9	0.86(19)	0.84(19)	0.85	0.94(15)	0.93(15)	0.93	0.71(20)	0.71(20)	0.71	0.64(18)	0.62(12)	0.63
SMRS	0.87(17)	0.85(19)	0.86	0.82(20)	0.79(14)	0.8	0.75(20)	0.75(20)	0.75	0.63(18)	0.63(18)	0.63	0.96(20)	0.95(20)	0.95	0.87(17)	0.86(17)	0.86	0.98(17)	0.98(17)	0.98	0.77(19)	0.77(19)	0.77	0.72(18)	0.69(18)	0.7
SMBA-CSFS	0.8(10)	0.8(10)	0.8	0.84(19)	0.8(19)	0.82	0.67(20)	0.68(20)	0.67	0.69(18)	0.62(18)	0.65	0.96(12)	0.96(12)	0.96	0.97(18)	0.97(18)	0.97	0.99(14)	0.99(13)	0.99	0.94(19)	0.92(17)	0.93	0.74(19)	0.71(20)	0.72
BSL	0.9	0.86	0.879545	0.95	0.92	0.934759	0.73	0.72	0.724966	0.85	0.71	0.773718	0.91	0.75	0.822289	0.73	0.74	0.734966	0.95	0.94	0.944974	0.93	0.92	0.924973	0.86	0.8	0.828916
PRECISION, RECALL AND F1-MEASURE (SMBA-CSFS vs GF-CSFS)
	ALLAML(2)			LEUKEMIA(2)			CLL_SUB_111(3)			GLIOMA(3)			LUNG_C(5)			LUNG_D(7)			DLBCL(9)			CAR(11)			GCM(14)
	P	R	F1	P	R	F1	P	R	F1	P	R	F1	P	R	F1	P	R	F1	P	R	F1	P	R	F1	P	R	F1
Fisher	0.95(11)	0.95(11)	0.95	0.98(2)	0.98(2)	0.98	0.8(19)	0.8(11)	0.8	0.73(5)	0.72(5)	0.72	0.98(19)	0.98(19)	0.98	0.95(11)	0.95(20)	0.95	0.98(8)	0.98(8)	0.98	0.97(19)	0.97(19)	0.97	0.86(20)	0.84(20)	0.85
Relief	0.96(10)	0.96(10)	0.96	0.98(2)	0.98(7)	0.98	0.81(8)	0.8(8)	0.8	0.72(15)	0.72(15)	0.72	0.98(19)	0.98(19)	0.98	0.94(11)	0.94(11)	0.94	0.99(19)	0.99(19)	0.99	0.94(17)	0.94(17)	0.94	0.84(15)	0.81(15)	0.82
MRMR	0.78(5)	0.77(5)	0.77	0.97(12)	0.97(12)	0.97	0.8(5)	0.8(5)	0.8	0.74(11)	0.73(11)	0.73	0.94(18)	0.93(18)	0.93	0.94(20)	0.93(20)	0.93	0.99(15)	0.99(15)	0.99	0.97(11)	0.97(11)	0.97	0.86(18)	0.84(18)	0.85
MI	0.97(10)	0.97(10)	0.97	0.98(2)	0.98(2)	0.98	0.8(14)	0.8(14)	0.8	0.76(9)	0.75(9)	0.75	0.99(10)	0.99(10)	0.99	0.94(13)	0.93(12)	0.93	0.99(7)	0.99(7)	0.99	0.97(20)	0.97(20)	0.97	0.9(18)	0.89(20)	0.89
ls_l21	0.85(17)	0.81(17)	0.83	0.86(12)	0.85(12)	0.85	0.68(16)	0.69(16)	0.68	0.76(18)	0.72(18)	0.74	0.92(15)	0.91(15)	0.91	0.87(17)	0.82(14)	0.84	0.92(20)	0.9(18)	0.91	0.68(20)	0.68(20)	0.68	0.71(17)	0.65(18)	0.68
ll_l21	0.76(19)	0.74(15)	0.75	0.86(20)	0.83(20)	0.84	0.65(20)	0.66(20)	0.65	0.65(16)	0.62(16)	0.63	0.95(20)	0.95(20)	0.95	0.89(17)	0.87(17)	0.88	0.92(16)	0.91(17)	0.91	0.76(20)	0.76(20)	0.76	0.64(18)	0.58(18)	0.61
RFS	0.79(12)	0.76(10)	0.77	0.86(16)	0.82(16)	0.84	0.69(17)	0.68(17)	0.68	0.64(20)	0.58(16)	0.61	0.92(11)	0.91(11)	0.91	0.89(20)	0.85(20)	0.87	0.91(16)	0.89(19)	0.9	0.76(18)	0.75(19)	0.75	0.69(20)	0.65(18)	0.67
LASSO	0.9(15)	0.89(15)	0.89	0.79(14)	0.74(14)	0.76	0.69(9)	0.7(9)	0.69	0.64(10)	0.62(6)	0.63	0.9(15)	0.89(15)	0.89	0.84(18)	0.82(18)	0.83	0.92(20)	0.92(19)	0.92	0.7(20)	0.71(19)	0.7	0.56(20)	0.52(14)	0.54
EN	0.9(15)	0.89(15)	0.89	0.79(14)	0.74(14)	0.76	0.69(9)	0.7(9)	0.69	0.64(10)	0.62(6)	0.63	0.9(15)	0.89(15)	0.89	0.84(18)	0.82(18)	0.83	0.92(20)	0.92(19)	0.92	0.7(20)	0.71(19)	0.7	0.56(20)	0.52(14)	0.54
SMBA-CSFS	0.8(10)	0.8(10)	0.8	0.84(19)	0.8(19)	0.82	0.67(20)	0.68(20)	0.67	0.69(18)	0.62(18)	0.65	0.96(12)	0.96(12)	0.96	0.97(18)	0.97(18)	0.97	0.99(14)	0.99(13)	0.99	0.94(19)	0.92(17)	0.93	0.74(19)	0.71(20)	0.72
BSL	0.9	0.86	0.879545	0.95	0.92	0.934759	0.73	0.72	0.724966	0.85	0.71	0.773718	0.91	0.75	0.822289	0.73	0.74	0.734966	0.95	0.94	0.944974	0.93	0.92	0.924973	0.86	0.8	0.828916
FRIEDMAN TEST (SMBA-CSFS vs TFS)													FRIEDMAN TEST (SMBA-CSFS vs GF-CSFS)
	ALLAML(2)	LEUKEMIA(2)	CLL_SUB_111(3)	GLIOMA(4)	LUNG_C(5)	LUNG_D(7)	DLBCL(9)	CAR(11)	GCM(14)	CR	CR≥5			ALLAML(2)	LEUKEMIA(2)	CLL_SUB_111(3)	GLIOMA(4)	LUNG_C(5)	LUNG_D(7)	DLBCL(9)	CAR(11)	GCM(14)	CR	CR≥5
Fisher	2.08	3.13	2.35	1.82	7.75	8.7	5.9	10.7	6.72	49.15	39.77		Fisher	2.17	1.65	1.7	1.63	2.77	2.95	4	1.85	2.95	21.67	14.52
Relief	2.23	2.55	4.35	3.88	3.63	2.98	4.38	3.1	10	37.1	24.09		Relief	2.73	3.35	1.4	5.78	3.73	4.58	3.67	4.03	3.58	32.85	19.59
MRMR	7.9	2.55	9.45	6.75	7.6	3	3.15	4.55	2.1	47.05	20.4		MRMR	8.43	2.48	8.25	7.28	7.65	2.4	1.6	5.03	4.08	47.2	20.76
MI	1.7	1.77	1.9	1.93	2.25	5.8	5	1.7	3.45	25.5	18.2		MI	1.1	2.52	3.2	1.48	2.4	4.83	3.27	2	1	21.8	13.5
ls_l21	7.58	9.15	6.5	8.97	8.4	7.92	9	9.3	7.58	74.4	42.2		ls_l21	7.92	7.72	6.85	8	9.75	8	8.4	9.85	6.52	73.01	42.52
ll_l21	8.88	6.35	8.8	6.8	4	7.8	10.2	7.2	6.58	66.61	35.78		ll_l21	8.88	7.35	8.7	6.8	6.05	8.15	9.9	8.3	8.55	72.68	40.95
RFS	8.78	8.95	7.45	8.6	8.22	8.72	9.15	5.9	8.05	73.82	40.04		RFS	5.88	6.08	6.6	8.8	8.55	6.3	7	6.25	6.72	62.18	34.82
LASSO	6.55	9.4	6.83	7.33	9.2	7.85	7.2	7.53	6.95	68.84	38.73		LASSO	5.6	8.93	7.28	5.92	6.5	8.35	7.35	7.75	9.1	66.78	39.05
EN	6.55	9.4	6.83	7.33	9.2	7.85	7.2	7.53	6.95	68.84	38.73		EN	5.6	8.93	7.28	5.92	6.5	8.35	7.35	7.75	9.1	66.78	39.05
SMRS	5.9	6.35	2.8	5.4	4.55	4.25	3.58	7.2	6.58	46.61	26.16		SMBA-CSFS	6.7	6	3.75	3.4	1.1	1.1	2.03	1.5	3.4	28.98	9.13
SMBA-CSFS	7.88	6.4	8.75	7.2	1.2	1.13	1.25	1.3	1.05	36.16	5.93
POST-HOC TEST (SMBA-CSFS vs TFS)												POST-HOC TEST (SMBA-CSFS vs GF-CSFS)
	ALLAML(2)	LEUKEMIA(2)	CLL_SUB_111(3)	GLIOMA(4)	LUNG_C(5)	LUNG_D(7)	DLBCL(9)	CAR(11)	GCM(14)				ALLAML(2)	LEUKEMIA(2)	CLL_SUB_111(3)	GLIOMA(4)	LUNG_C(5)	LUNG_D(7)	DLBCL(9)	CAR(11)	GCM(14)
Fisher	1.76044e-06	0.098597	5.75543e-08	1.63766e-05	2.32822e-08	2.80764e-11	0.000509696	0	3.44898e-06			Fisher	0.000102938	0.000249062	1	1	1	1	1	1	1
Relief	3.93899e-06	0.013297	0.00149924	0.0837655	1	1	0.158759	1	0			Relief	0.00148473	0.253935	0.634872	0.590216	0.27503	0.0127777	1	1	1
MRMR	1	0.013297	1	1	5.75543e-08	1	1	0.106885	1			MRMR	1	0.010424	0.000117017	0.00233148	3.53267e-10	1	1	0.142713	1
MI	2.15473e-07	0.000569157	3.58802e-09	2.70447e-05	1	0.000456198	0.0192269	1	1			MI	2.22529e-07	0.0127777	1	1	1	0.00449919	1	1	0.54836
ls_l21	1	0.480754	1	1	3.65885e-10	4.92755e-09	8.12128e-12	1.31894e-12	2.71104e-08			ls_l21	1	1	0.0541964	6.97973e-05	0	2.57694e-11	2.31591e-08	5.9952e-14	0.0494407
ll_l21	1	1	1	1	0.417561	1.07856e-08	0	1.01776e-06	7.59042e-06			ll_l21	1	1	1.05282e-05	0.0172576	1.05282e-05	8.06355e-12	3.19744e-13	8.43765e-09	3.37054e-06
RFS	1	0.827394	1	1	1.16151e-09	2.35578e-11	2.73559e-12	0.000635208	1.36685e-09			RFS	1	1	0.131104	7.6471e-07	3.19744e-13	2.51861e-06	9.04931e-05	0.0010512	0.0231734
LASSO	1	0.232718	1	1	1.31894e-12	7.89739e-09	7.71289e-07	1.61315e-07	1.01776e-06			LASSO	1	0.101256	0.010424	0.376086	7.6471e-07	1.64868e-12	1.39043e-05	3.0419e-07	1.18142e-07
EN	1	0.232718	1	1	1.31894e-12	7.89739e-09	7.71289e-07	1.61315e-07	1.01776e-06			EN	1	0.101256	0.010424	0.376086	7.6471e-07	1.64868e-12	1.39043e-05	3.0419e-07	1.18142e-07
SMRS	1	1	7.71289e-07	1	0.0771472	0.158759	1	1.01776e-06	7.59042e-06

## Sheet: No. 80 features
AVERAGE ACCURACY (SMBA-CSFS vs TFS)												AVERAGE ACCURACY (SMBA-CSFS vs GF-CSFS)
	ALLAML(2)	LEUKEMIA(2)	CLL_SUB_111(3)	GLIOMA(4)	LUNG_C(5)	LUNG_D(7)	DLBCL(9)	CAR(11)	GCM(14)				ALLAML(2)	LEUKEMIA(2)	CLL_SUB_111(3)	GLIOMA(4)	LUNG_C(5)	LUNG_D(7)	DLBCL(9)	CAR(11)	GCM(14)
Fisher	96,84±0,04(37)	98,95±0,02(8)	75,2±0,06(10)	81,67±0,11(15)	96,83±0,01(48)	89,08±0,06(64)	98,79±0,02(42)	87,19±0,04(80)	96.77+/-0.01(76)			Fisher	97,24±0,03(38)	98,67±0,03(8)	78,46±0,09(59)	80,0±0,14(37)	95,56±0,04(32)	86,48±0,09(36)	98,07±0,02(24)	91,98±0,05(52)	97.89+/-0.0(44)
Relief	96,84±0,04(24)	97,89±0,03(3)	74,49±0,04(76)	83,33±0,07(29)	96,98±0,01(63)	93,91±0,04(64)	98,55±0,02(35)	92,26±0,03(62)	95.68+/-0.01(59)			Relief	97,24±0,03(73)	97,24±0,03(75)	81,19±0,07(60)	78,0±0,12(61)	95,09±0,03(67)	86,48±0,07(71)	98,8±0,02(27)	86,84±0,07(79)	97.96+/-0.0(61)
MRMR	84,09±0,07(70)	97,89±0,03(19)	70,02±0,07(50)	76,67±0,13(69)	95,54±0,02(35)	93,2±0,02(66)	98,79±0,01(12)	93,59±0,04(73)	97.41+/-0.01(68)			MRMR	73,62±0,05(10)	97,24±0,03(6)	57,59±0,05(8)	60,0±0,11(14)	90,16±0,06(59)	86,48±0,07(14)	99,76±0,0(5)	83,39±0,06(26)	97.76+/-0.0(39)
MI	96,84±0,03(53)	98,95±0,02(8)	79,14±0,06(45)	81,67±0,06(31)	97,41±0,01(51)	90,44±0,06(80)	95,89±0,02(80)	96,97±0,01(72)	96.53+/-0.00(52)			MI	98,57±0,03(77)	98,67±0,03(11)	75,61±0,08(75)	84,0±0,05(31)	95,57±0,04(34)	83,9±0,12(58)	98,31±0,02(5)	90,84±0,07(61)	98.47+/-0.0(20)
ls_l21	95,73±0,04(78)	87,25±0,08(57)	71,94±0,06(79)	80,0±0,08(75)	92,66±0,02(77)	92,53±0,04(78)	92,75±0,04(66)	89,54±0,04(79)	96.7+/-0.01(78)			ls_l21	88,95±0,06(68)	91,71±0,05(69)	65,02±0,12(70)	76,0±0,14(75)	91,66±0,05(78)	82,48±0,11(54)	91,08±0,06(37)	70,12±0,04(66)	96.77+/-0.0(71)
ll_l21	91,35±0,07(66)	80,88±0,07(20)	69,87±0,06(78)	85,0±0,06(78)	98,13±0,01(51)	86,39±0,09(79)	90,82±0,03(54)	84,82±0,04(73)	96.5+/-0.01(64)			ll_l21	80,76±0,12(80)	84,38±0,12(53)	56,6±0,11(2)	82,0±0,12(45)	93,62±0,06(68)	78,19±0,12(79)	90,35±0,04(61)	69,56±0,05(60)	95.44+/-0.0(79)
RFS	95,73±0,02(80)	90,53±0,06(55)	78,43±0,04(57)	81,67±0,06(54)	92,52±0,02(50)	91,84±0,03(80)	92,26±0,04(23)	91,89±0,05(74)	97.59+/-0.01(71)			RFS	90,57±0,09(60)	91,62±0,05(45)	62,13±0,09(33)	76,0±0,14(72)	91,17±0,05(72)	83,71±0,08(21)	92,51±0,01(78)	76,99±0,09(78)	96.94+/-0.0(59)
LASSO	83,92±0,06(13)	76,61±0,09(53)	73,83±0,06(52)	78,33±0,07(56)	94,39±0,03(46)	82,92±0,07(58)	93,24±0,03(66)	87,22±0,05(80)	95.71+/-0.01(38)			LASSO	81,9±0,06(44)	83,05±0,13(37)	61,11±0,09(67)	80,0±0,14(66)	92,1±0,05(38)	74,0±0,13(80)	94,21±0,04(41)	67,26±0,09(74)	94.05+/-0.0(79)
EN	83,92±0,06(13)	76,61±0,09(53)	73,83±0,06(52)	78,33±0,07(56)	94,39±0,03(46)	82,92±0,07(58)	93,24±0,03(66)	87,22±0,05(80)	95.71+/-0.01(38)			EN	81,9±0,06(44)	83,05±0,13(37)	61,11±0,09(67)	80,0±0,14(66)	92,1±0,05(38)	74,0±0,13(80)	94,21±0,04(41)	67,26±0,09(74)	94.05+/-0.0(79)
SMBA	87,25±0,02(12)	80,88±0,07(20)	74,6±0,07(58)	86,67±0,08(80)	97,99±0,02(74)	93,17±0,04(65)	98,58±0,01(78)	84,82±0,04(73)	96.5+/-0.01(64)			SMBA-CSFS	82,98±0,05(13)	84,21±0,12(52)	69,23±0,12(43)	80,0±0,08(71)	98,13±0,01(43)	91,2±0,03(28)	99,88±0,03(33)	99,78±0,02(65)	98.2+/-0.01(44)
SMBA-CSFS	82,98±0,05(13)	84,21±0,12(52)	69,23±0,12(43)	80,0±0,08(71)	98,13±0,01(43)	91,2±0,03(28)	99,88±0,03(33)	99,78±0,02(65)	98.2+/-0.01(44)			BSL	82±0,11	87,43±0,03	53,28±0,11	80±0,11	94,1±0,03	79,52±0,08	89,63±0,073	76,42±0,023	100±0.0
BSL	82±0,11	87,43±0,03	53,28±0,11	80±0,11	94,1±0,03	79,52±0,08	89,63±0,073	76,42±0,023	100±0.0
PRECISION, RECALL AND F1-MEASURE (SMBA-CSFS vs TFS)
	ALLAML(2)			LEUKEMIA(2)			CLL_SUB_111(3)			GLIOMA(3)			LUNG_C(5)			LUNG_D(7)			DLBCL(9)			CAR(11)			GCM(14)
	P	R	F1	P	R	F1	P	R	F1	P	R	F1	P	R	F1	P	R	F1	P	R	F1	P	R	F1	P	R	F1
Fisher	0.98(44)	0.98(44)	0.98	0.98(12)	0.98(12)	0.98	0.76(37)	0.76(37)	0.76	0.78(14)	0.77(14)	0.77	0.96(79)	0.96(78)	0.96	0.89(57)	0.87(57)	0.88	0.98(54)	0.98(54)	0.98	0.9(80)	0.9(80)	0.9	0.79(66)	0.77(76)	0.78
Relief	0.98(24)	0.98(24)	0.98	0.99(4)	0.99(4)	0.99	0.76(21)	0.76(21)	0.76	0.8(56)	0.8(56)	0.8	0.98(71)	0.98(66)	0.98	0.93(71)	0.93(71)	0.93	0.99(49)	0.99(49)	0.99	0.94(66)	0.94(80)	0.94	0.74(62)	0.7(59)	0.72
MRMR	0.81(42)	0.81(42)	0.81	0.98(10)	0.98(10)	0.98	0.7(35)	0.71(35)	0.7	0.75(31)	0.73(31)	0.74	0.95(40)	0.95(39)	0.95	0.93(62)	0.93(62)	0.93	0.98(80)	0.98(80)	0.98	0.97(67)	0.97(67)	0.97	0.84(75)	0.82(75)	0.83
MI	0.98(41)	0.98(41)	0.98	0.98(2)	0.98(2)	0.98	0.8(38)	0.79(80)	0.79	0.74(30)	0.73(30)	0.73	0.98(63)	0.98(60)	0.98	0.91(67)	0.89(41)	0.9	0.97(48)	0.96(48)	0.96	0.96(76)	0.96(58)	0.96	0.78(79)	0.76(52)	0.77
ls_l21	0.95(55)	0.95(55)	0.95	0.91(23)	0.88(22)	0.89	0.74(74)	0.73(74)	0.73	0.78(64)	0.77(64)	0.77	0.93(32)	0.92(32)	0.92	0.94(67)	0.94(67)	0.94	0.92(59)	0.92(59)	0.93	0.93(74)	0.93(74)	0.93	0.81(78)	0.77(78)	0.79
ll_l21	0.94(53)	0.94(53)	0.94	0.84(32)	0.79(14)	0.81	0.74(32)	0.75(32)	0.74	0.81(78)	0.78(78)	0.79	0.98(41)	0.98(41)	0.98	0.9(59)	0.87(59)	0.88	0.93(17)	0.92(17)	0.92	0.86(73)	0.86(73)	0.86	0.82(74)	0.75(64)	0.78
RFS	0.96(64)	0.96(64)	0.96	0.9(39)	0.87(39)	0.88	0.75(80)	0.76(80)	0.75	0.79(76)	0.78(45)	0.78	0.94(52)	0.93(52)	0.93	0.93(80)	0.92(79)	0.92	0.93(55)	0.92(37)	0.92	0.92(77)	0.91(77)	0.91	0.86(71)	0.83(71)	0.84
LASSO	0.83(13)	0.83(11)	0.83	0.81(51)	0.73(44)	0.77	0.74(36)	0.75(36)	0.74	0.79(73)	0.77(61)	0.78	0.95(45)	0.94(45)	0.94	0.9(68)	0.89(68)	0.89	0.94(41)	0.94(36)	0.94	0.86(77)	0.84(77)	0.85	0.73(79)	0.7(38)	0.71
EN	0.83(13)	0.83(11)	0.83	0.81(51)	0.73(44)	0.77	0.74(36)	0.75(36)	0.74	0.79(73)	0.77(61)	0.78	0.95(45)	0.94(45)	0.94	0.9(68)	0.89(68)	0.89	0.94(41)	0.94(36)	0.94	0.86(77)	0.84(77)	0.85	0.73(79)	0.7(38)	0.71
SMBA	0.89(31)	0.86(21)	0.87	0.84(32)	0.79(14)	0.81	0.77(21)	0.76(21)	0.76	0.78(80)	0.78(80)	0.78	0.98(77)	0.98(77)	0.98	0.96(79)	0.95(71)	0.95	0.99(66)	0.99(42)	0.99	0.86(73)	0.86(73)	0.86	0.82(74)	0.75(64)	0.78
SMBA-CSFS	0.82(23)	0.82(23)	0.82	0.87(69)	0.83(69)	0.85	0.7(21)	0.71(21)	0.7	0.77(61)	0.73(61)	0.75	0.98(43)	0.98(43)	0.98	0.96(67)	0.96(67)	0.96	0.99(14)	0.99(13)	0.99	0.99(79)	0.99(79)	0.99	0.83(73)	0.84(73)	0.83
BSL	0.9	0.86	0.879545	0.95	0.92	0.934759	0.73	0.72	0.724966	0.85	0.71	0.773718	0.91	0.75	0.822289	0.73	0.74	0.734966	0.95	0.94	0.944974	0.93	0.92	0.924973	0.86	0.8	0.828916
PRECISION, RECALL AND F1-MEASURE (SMBA-CSFS vs GF-CSFS)
	ALLAML(2)			LEUKEMIA(2)			CLL_SUB_111(3)			GLIOMA(3)			LUNG_C(5)			LUNG_D(7)			DLBCL(9)			CAR(11)			GCM(14)
	P	R	F1	P	R	F1	P	R	F1	P	R	F1	P	R	F1	P	R	F1	P	R	F1	P	R	F1	P	R	F1
Fisher	0.98(59)	0.98(67)	0.98	0.98(2)	0.98(2)	0.98	0.83(64)	0.82(64)	0.82	0.73(5)	0.72(5)	0.72	0.98(19)	0.98(19)	0.98	0.96(30)	0.95(27)	0.95	0.98(8)	0.98(8)	0.98	0.98(62)	0.98(62)	0.98	0.88(52)	0.85(44)	0.86
Relief	0.99(50)	0.99(50)	0.99	0.98(2)	0.98(7)	0.98	0.81(8)	0.8(8)	0.8	0.74(43)	0.73(24)	0.73	0.98(39)	0.98(24)	0.98	0.94(33)	0.94(33)	0.94	0.99(19)	0.99(19)	0.99	0.98(77)	0.98(77)	0.98	0.89(39)	0.86(61)	0.87
MRMR	0.78(5)	0.77(5)	0.77	0.98(21)	0.98(21)	0.98	0.81(33)	0.8(5)	0.8	0.77(64)	0.77(64)	0.77	0.95(49)	0.94(49)	0.94	0.95(55)	0.95(49)	0.95	0.99(22)	0.99(15)	0.99	0.98(29)	0.98(29)	0.98	0.86(75)	0.84(39)	0.85
MI	0.98(79)	0.98(79)	0.98	0.98(2)	0.98(2)	0.98	0.83(67)	0.82(67)	0.82	0.8(56)	0.77(30)	0.78	0.99(10)	0.99(10)	0.99	0.95(58)	0.94(57)	0.94	0.99(7)	0.99(7)	0.99	0.98(67)	0.97(68)	0.97	0.9(18)	0.89(20)	0.89
ls_l21	0.95(79)	0.95(79)	0.95	0.9(40)	0.87(40)	0.88	0.78(62)	0.78(62)	0.78	0.76(18)	0.72(18)	0.74	0.93(59)	0.92(59)	0.92	0.94(80)	0.92(80)	0.93	0.93(59)	0.93(59)	0.93	0.78(80)	0.78(80)	0.78	0.82(71)	0.77(71)	0.79
ll_l21	0.93(80)	0.93(80)	0.93	0.87(21)	0.83(20)	0.85	0.71(21)	0.71(21)	0.71	0.78(77)	0.72(77)	0.75	0.98(42)	0.98(42)	0.98	0.9(32)	0.88(32)	0.89	0.92(21)	0.91(21)	0.91	0.85(71)	0.85(71)	0.85	0.76(79)	0.68(79)	0.72
RFS	0.95(53)	0.95(53)	0.95	0.91(71)	0.89(71)	0.9	0.8(77)	0.8(63)	0.8	0.77(74)	0.72(74)	0.74	0.93(80)	0.92(79)	0.92	0.94(73)	0.93(74)	0.93	0.95(79)	0.94(77)	0.94	0.87(75)	0.85(79)	0.86	0.82(59)	0.79(60)	0.8
LASSO	0.9(15)	0.89(15)	0.89	0.87(66)	0.82(47)	0.84	0.73(43)	0.74(29)	0.73	0.79(58)	0.75(58)	0.77	0.95(43)	0.94(42)	0.94	0.9(67)	0.87(67)	0.88	0.94(26)	0.94(25)	0.94	0.89(78)	0.88(78)	0.88	0.63(80)	0.58(79)	0.6
EN	0.9(15)	0.89(15)	0.89	0.87(66)	0.82(47)	0.84	0.73(43)	0.74(29)	0.73	0.79(58)	0.75(58)	0.77	0.95(43)	0.94(42)	0.94	0.9(67)	0.87(67)	0.88	0.94(26)	0.94(25)	0.94	0.89(78)	0.88(78)	0.88	0.63(80)	0.58(79)	0.6
SMBA-CSFS	0.82(23)	0.82(23)	0.82	0.87(69)	0.83(69)	0.85	0.7(21)	0.71(21)	0.7	0.77(61)	0.73(61)	0.75	0.98(43)	0.98(43)	0.98	0.96(67)	0.96(67)	0.96	0.99(14)	0.99(13)	0.99	0.99(79)	0.99(79)	0.99	0.83(73)	0.84(73)	0.83
BSL	0.9	0.86	0.879545	0.95	0.92	0.934759	0.73	0.72	0.724966	0.85	0.71	0.773718	0.91	0.75	0.822289	0.73	0.74	0.734966	0.95	0.94	0.944974	0.93	0.92	0.924973	0.86	0.8	0.828916
FRIEDMAN TEST (SMBA-CSFS vs TFS)													FRIEDMAN TEST (SMBA-CSFS vs GF-CSFS)
	ALLAML(2)	LEUKEMIA(2)	CLL_SUB_111(3)	GLIOMA(4)	LUNG_C(5)	LUNG_D(7)	DLBCL(9)	CAR(11)	GCM(14)	CR	CR≥5			ALLAML(2)	LEUKEMIA(2)	CLL_SUB_111(3)	GLIOMA(4)	LUNG_C(5)	LUNG_D(7)	DLBCL(9)	CAR(11)	GCM(14)	CR	CR≥5
Fisher	1.73	3.01	4.56	6.5	6.36	7.84	3.67	10.4	5.21	49.28	33.48		Fisher	1.47	2.29	1.93	2.81	3.24	4.39	4.01	2.19	3.49	25.82	17.32
Relief	2.14	1.88	5.05	3.66	4.71	1.92	4.27	3.86	10.22	37.71	24.98		Relief	2.91	2.66	1.15	5.42	3.53	3.43	3.17	4.11	3.89	30.27	18.13
MRMR	9.19	2.28	9.09	8.13	6.87	3.1	3.77	3.98	2.2	48.61	19.92		MRMR	9.29	2.39	9.18	9.3	8.56	3.29	1.24	4.89	4.32	52.46	22.3
MI	2.14	2.83	1.44	2.09	3.31	6.27	5.75	1.93	4.9	30.66	22.16		MI	1.63	2.66	3.01	2.95	2.37	4.71	4.5	2.53	1.15	25.51	15.26
ls_l21	5.79	6.91	6.57	7.81	9.77	5.07	9.32	7.1	5.93	64.27	37.19		ls_l21	6.13	6.33	5.66	8.2	9.15	5.68	8.76	9	6.77	65.68	39.36
ll_l21	6.79	8.21	9.72	4.7	2.63	8.35	10.74	8.31	7.31	66.76	37.34		ll_l21	8.37	8.05	9	5.42	5.3	8.16	9.96	7.56	8.14	69.96	39.12
RFS	6.05	6.18	3.84	6.91	9.17	7.35	9.49	4.56	4.14	57.69	34.71		RFS	4.59	5.55	6.54	7.48	7.79	6.01	7.76	6.19	6.29	58.2	34.04
LASSO	8.42	9.93	5.8	7.55	9.16	9.81	7.44	8.24	8.88	75.23	43.53		LASSO	6.31	8.91	7.29	4.84	7.02	9.15	6.76	8.61	9.4	68.29	40.94
EN	8.42	9.93	5.8	7.55	9.16	9.81	7.44	8.24	8.88	75.23	43.53		EN	6.31	8.91	7.29	4.84	7.02	9.15	6.76	8.61	9.4	68.29	40.94
SMBA	6.19	8.21	4.7	3.48	2.97	3.16	2.39	8.5	7.31	46.91	24.33		SMBA-CSFS	8.01	7.26	3.96	3.73	1.02	1.02	1.09	1.3	2.15	29.54	6.58
SMBA-CSFS	8.15	6.63	9.64	7.63	2.01	2.31	1.6	1.07	1.01	40.05	8
POST-HOC TEST (SMBA-CSFS vs TFS)												POST-HOC TEST (SMBA-CSFS vs GF-CSFS)
	ALLAML(2)	LEUKEMIA(2)	CLL_SUB_111(3)	GLIOMA(4)	LUNG_C(5)	LUNG_D(7)	DLBCL(9)	CAR(11)	GCM(14)				ALLAML(2)	LEUKEMIA(2)	CLL_SUB_111(3)	GLIOMA(4)	LUNG_C(5)	LUNG_D(7)	DLBCL(9)	CAR(11)	GCM(14)
Fisher	0	2.85e-10	0	1	0	0	0.0100273	0	6.10623e-14			Fisher	0	0	0.000935694	1	0.000171223	8.83e-11	0.00275397	1	0.234311
Relief	0	0	0	2.28e-12	1.44e-05	0.241615	6e-05	6.24e-06	0			Relief	0	0	1.9e-07	0.0190515	7.41e-06	2.25e-05	1	2.06e-07	0.0121466
MRMR	1	0	1	1	0	1	0.00484771	1.76e-06	1			MRMR	0.334836	0	0	0	0	0.000102938	1	2.72e-12	0.000264961
MI	0	2.16e-11	0	0	0.700768	2.82e-06	7.57e-13	1	6.77791e-12			MI	0	0	1	1	0.225022	6.59e-13	2.1e-05	0.455011	1
ls_l21	8.54e-09	1	2.67e-07	1	0	0.0872673	0	0	0			ls_l21	0.00362322	1	0.0172576	0	0	0	0	0	0
ll_l21	0.000364861	0.141187	1	1.34e-06	1	0	0	0	0			ll_l21	1	1	0	0.0190515	0	0	0	0	0
RFS	1.86e-07	1	0	1	0	3.29e-12	0	1.74e-09	1.29645e-07			RFS	3.78e-11	0.0156225	3.37e-06	2.1e-13	0	0	0	0	0
LASSO	1	1.85e-08	1.39e-11	1	0	0	0	0	0			LASSO	0.016421	0.0267949	1.69e-10	0.9058	0	0	0	0	0
EN	1	1.85e-08	1.39e-11	1	0	0	0	0	0			EN	0.016421	0.0267949	1.69e-10	0.9058	0	0	0	0	0
SMBA	8.86e-07	0.141187	0	1.34e-13	1	1	1	0	0
